# Supplementary material for: 24-Methylenecycloartanyl Ferulate Induces PPAR-&gamma;2 Mediated Regulation of Angiogenesis-Related Genes and Inhibits Akt/mTOR Signaling
Source: Preprints.org preprint supplement (doi:10.20944/preprints201807.0297.v1), 2018-07-17
Supplement: Supplementary file 2 [file supplementary]

## Sheet: Sheet1
Supplementary 1. Gene expression profiles of 24-MCF treated MCF7 cells (DMSO vs 24 MCF)
Systematic	Gene Symbol	Normalized	Flags	Raw	Control	Common	Genbank	RefSeqAccession	REFSEQ	GeneSymbol	GenomicCoordinates	GO	UniGeneID	EnsemblID	Description	Cytoband	TIGRID	GO_ID	GeneName	Sequence	EntrezGeneID	GO cellular component	GO molecular function	Summary	GO biological process	Keywords	Function	Product	Phenotype	Pathways	PubMedID
A_24_P151121	A1BG	1.40434	A	7.83033	5.57579	A1B; ABG; GAB; HYST2477; DKFZp686F0970				A1BG	chr19:058857206-058857147	GO:0003674(molecular_function)|GO:0005576(extracellular region)|GO:0008150(biological_process)	Hs.529161		Homo sapiens cDNA FLJ31639 fis, clone NT2RI2003655, weakly similar to ZINC FINGER PROTEIN 195. [AK056201]	hs|19q13.43	THC2461029		alpha-1-B glycoprotein	GCTAGTGATCTGGTTTACTGCCTTAGTAATATCTAGTTCCTAATATGCCTATGCCTTTTA	1	GO:5576(extracellular region)	GO:3674(molecular_function)	The protein encoded by this gene is a plasma glycoprotein of unknown function. The protein shows sequence similarity to the variable regions of some immunoglobulin supergene family member proteins.	GO:8150(biological_process)			alpha 1B-glycoprotein			16335952; 15489334; 15461460; 15221005; 14760718; 14702039; 12477932; 8889549; 3610142; 3458201; 2591067
A_33_P3685216	A1BG	0.706872	P	338.637	479.065		NM_130786	NM_130786	NM_130786	A1BG	chr19:058858293-058858234	GO:0003674(molecular_function)|GO:0005576(extracellular region)|GO:0008150(biological_process)	Hs.529161	ENST00000263100	Homo sapiens alpha-1-B glycoprotein (A1BG), mRNA [NM_130786]	hs|19q13.43	THC2461029	GO:0003674(molecular_function)|GO:0005576(extracellular region)|GO:0008150(biological_process)	alpha-1-B glycoprotein	TCTCTGGGGGGCTGGAGAAGCCTCCCTCATTCCTCCCAGGAATTAATAAATGTGAAGAGA	1
A_24_P721699	A1BG-AS1	1.38087	A	7.53354	5.45563	FLJ23569	NR_015380	NR_015380	NR_015380	A1BG-AS1	chr19:058866199-058866258		Hs.709582		Homo sapiens A1BG antisense RNA 1 (non-protein coding) (A1BG-AS1), non-coding RNA [NR_015380]	hs|19q13.43	NP1154677		A1BG antisense RNA 1 (non-protein coding)	AGGGTGTGCACAGAACTCAGAAGTCAGACCACTGAACAGTGACAGAACCTTTCAGCCCAT	503538					FLI_CDNA; oligo capping; fis (full insert sequence)					12477932
A_23_P104224	A1CF	0.858276	P	1157.07	1348.13	ACF; ASP; ACF64; ACF65; MGC163391; RP11-564C4.2	NM_138933	NM_138933	NM_138933	A1CF	chr10:052570857-052570800	GO:0000166(nucleotide binding)|GO:0003676(nucleic acid binding)|GO:0003723(RNA binding)|GO:0003725(double-stranded RNA binding)|GO:0003727(single-stranded RNA binding)|GO:0003729(mRNA binding)|GO:0004131(cytosine deaminase activity)|GO:0005515(protein binding)|GO:0005622(intracellular)|GO:0005634(nucleus)|GO:0005654(nucleoplasm)|GO:0005720(nuclear heterochromatin)|GO:0005737(cytoplasm)|GO:0005783…	Hs.282795	ENST00000395489	Homo sapiens APOBEC1 complementation factor (A1CF), transcript variant 3, mRNA [NM_138933]	hs|10q11.23	NP220852	GO:0000166(nucleotide binding)|GO:0003725(double-stranded RNA binding)|GO:0003727(single-stranded RNA binding)|GO:0005515(protein binding)|GO:0005634(nucleus)|GO:0005737(cytoplasm)|GO:0005783(endoplasmic reticulum)|GO:0006397(mRNA processing)|GO:0030895(apolipoprotein B mRNA editing enzyme complex)|GO:0050821(protein stabilization)	APOBEC1 complementation factor	GACAGCTATTCTTGTACAAAATAACTATTCCTGCTCTAGCCAGCCAGAATCCTGCAATCC	29974	GO:30895(apolipoprotein B mRNA editing enzyme complex); GO:5737(cytoplasm); GO:5634(nucleus)	GO:3725(double-stranded RNA binding); GO:3676(nucleic acid binding); GO:166(nucleotide binding); GO:5515(protein binding); GO:3727(single-stranded RNA binding)	Mammalian apolipoprotein B mRNA undergoes site-specific C to U deamination, which is mediated by a multi-component enzyme complex containing a minimal core composed of APOBEC-1 and a complementation factor encoded by this gene. The gene product has three non-identical RNA recognition motifs and belongs to the hnRNP R family of RNA-binding proteins. It has been proposed that this complementation f…	GO:6381(mRNA editing); GO:6397(mRNA processing); GO:50821(protein stabilization)			apobec-1 complementation factor isoform 3			16055734; 15164054; 15148397; 14702039; 12896982; 12881431; 12477932; 11871661; 11815617; 11752456; 11718896; 11577082; 11571303; 11352648; 11329013; 11134005; 11072063; 10833526; 10781591; 10669759
A_32_P110872	A2LD1	1.00451	P	254.067	252.926	LOC87769	NM_033110	NM_033110	NM_033110	A2LD1	chr13:101183916-101183857	GO:0003839(gamma-glutamylcyclotransferase activity)|GO:0016746(transferase activity, transferring acyl groups)|GO:0042219(cellular modified amino acid catabolic process)	Hs.350868	ENST00000455100	Homo sapiens AIG2-like domain 1 (A2LD1), transcript variant 1, mRNA [NM_033110]	hs|13q32.3	THC2610190		AIG2-like domain 1	GCTGTATATCAGAGTGCGTATAGCACCATTCTTCCTAATTTTCAGATCAAGCTTCACAGC	87769		GO:0005554(molecular function unknown)					LOC87769 protein			14702039; 12477932
A_23_P116898	A2M	0.847035	P	38659.9	45641.4	CPAMD5; FWP007; S863-7; alpha 2M; DKFZp779B086	NM_000014	NM_000014	NM_000014	A2M	chr12:009221418-009221359	GO:0001869(negative regulation of complement activation, lectin pathway)|GO:0002576(platelet degranulation)|GO:0004867(serine-type endopeptidase inhibitor activity)|GO:0005515(protein binding)|GO:0005576(extracellular region)|GO:0005615(extracellular space)|GO:0005829(cytosol)|GO:0007264(small GTPase mediated signal transduction)|GO:0007596(blood coagulation)|GO:0007597(blood coagulation, intrins…	Hs.212838	ENST00000540099	Homo sapiens alpha-2-macroglobulin (A2M), mRNA [NM_000014]	hs|12p13.31	NP1159902	GO:0001869(negative regulation of complement activation, lectin pathway)|GO:0004867(serine-type endopeptidase inhibitor activity)|GO:0005576(extracellular region)|GO:0005615(extracellular space)|GO:0006953(acute-phase response)|GO:0007584(response to nutrient)|GO:0010037(response to carbon dioxide)|GO:0019899(enzyme binding)|GO:0019959(interleukin-8 binding)|GO:0019966(interleukin-1 binding)|GO:0…	alpha-2-macroglobulin	CTTGTTCTTCACGGTTCTGCAAGATGTCCCAGTAAGAGATCTGAAACCAGCCATAGTGAA	2	GO:5576(extracellular region)	GO:19899(enzyme binding); GO:19966(interleukin-1 binding); GO:19959(interleukin-8 binding); GO:8320(protein carrier activity); GO:4867(serine-type endopeptidase inhibitor activity); GO:43120(tumor necrosis factor binding); GO:17114(wide-spectrum protease inhibitor activity)	Alpha-2-macroglobulin is a protease inhibitor and cytokine transporter. It inhibits many proteases, including trypsin, thrombin and collagenase. A2M is implicated in Alzheimer disease (AD) due to its ability to mediate the clearance and degradation of A-beta, the major component of beta-amyloid deposits.	GO:6886(intracellular protein transport); GO:51260(protein homooligomerization)			alpha-2-macroglobulin precursor	Alzheimer disease, susceptibility to; Emphysema due to alpha-2-macroglobulin deficiency	KEGG pathway: Alzheimer's disease 05010; KEGG pathway: Complement and coagulation cascades 04610; Reactome Event:Hemostasis 109582	17071617; 16910174; 16784755; 16641085; 16407218; 16335952; 16297527; 16232083; 15931081; 15910735; 15908432; 15611997; 15511627; 15489334; 15023809; 14760718; 14718574; 14715656; 14678766; 14675603; 14637088; 14506912; 12966032; 12755687; 12755614; 12754519; 12631277; 12477932; 12221172; 12194978; 12175343; 12062545; 12042276; 12015318; 11916201; 11910179; 11901360; 11823454; 11811950; 11435418;…
A_33_P3525263	A2ML1	1.38556	A	6.89393	4.97554		NM_144670	NM_144670	NM_144670	A2ML1	chr12:009027061-009027120	GO:0004867(serine-type endopeptidase inhibitor activity)|GO:0005576(extracellular region)|GO:0005615(extracellular space)|GO:0010466(negative regulation of peptidase activity)|GO:0030414(peptidase inhibitor activity)|GO:0052548(regulation of endopeptidase activity)	Hs.620532	ENST00000541459	Homo sapiens alpha-2-macroglobulin-like 1 (A2ML1), mRNA [NM_144670]	hs|12p13.31	NP1162821	GO:0004867(serine-type endopeptidase inhibitor activity)|GO:0005515(protein binding)|GO:0005576(extracellular region)|GO:0005615(extracellular space)|GO:0052548(regulation of endopeptidase activity)	alpha-2-macroglobulin-like 1	AAAGTGTGCTGGTCACCAACTTGAAACCAGCAACCATCAAGGTCTATGACTACTACCTAC	144568
A_24_P151122	A1BG	1.06216	A	16759.7	19758.3	A1B; ABG; GAB; HYST2477; DKFZp686F0971				A1BG	chr19:058857206-058857148	GO:0003674(molecular_function)|GO:0005576(extracellular region)|GO:0008150(biological_process)	Hs.529161		Homo sapiens cDNA FLJ31639 fis, clone NT2RI2003655, weakly similar to ZINC FINGER PROTEIN 195. [AK056201]	hs|19q13.43	THC2461029		alpha-1-B glycoprotein	GCTAGTGATCTGGTTTACTGCCTTAGTAATATCTAGTTCCTAATATGCCTATGCCTTTTA	111970	GO:5576(extracellular region)	GO:3674(molecular_function)	The protein encoded by this gene is a plasma glycoprotein of unknown function. The protein shows sequence similarity to the variable regions of some immunoglobulin supergene family member proteins.	GO:8150(biological_process)			alpha 1B-glycoprotein			16335952; 15489334; 15461460; 15221005; 14760718; 14702039; 12477932; 8889549; 3610142; 3458201; 2591068
A_33_P3685217	A1BG	1.05672	P	19505.7	22992.9		NM_130786	NM_130786	NM_130786	A1BG	chr19:058858293-058858235	GO:0003674(molecular_function)|GO:0005576(extracellular region)|GO:0008150(biological_process)	Hs.529161	ENST00000263100	Homo sapiens alpha-1-B glycoprotein (A1BG), mRNA [NM_130786]	hs|19q13.43	THC2461029	GO:0003674(molecular_function)|GO:0005576(extracellular region)|GO:0008150(biological_process)	alpha-1-B glycoprotein	TCTCTGGGGGGCTGGAGAAGCCTCCCTCATTCCTCCCAGGAATTAATAAATGTGAAGAGA	112610
A_24_P721700	A1BG-AS2	1.05127	A	22251.6	26227.6	FLJ23570	NR_015380	NR_015380	NR_015380	A1BG-AS2	chr19:058866199-058866259		Hs.709582		Homo sapiens A1BG antisense RNA 1 (non-protein coding) (A1BG-AS1), non-coding RNA [NR_015380]	hs|19q13.43	NP712973		A1BG antisense RNA 1 (non-protein coding)	AGGGTGTGCACAGAACTCAGAAGTCAGACCACTGAACAGTGACAGAACCTTTCAGCCCAT	113251					FLI_CDNA; oligo capping; fis (full insert sequence)					12477933
A_23_P104225	A1CF	1.04583	P	24997.5	29462.2	ACF; ASP; ACF64; ACF65; MGC163391; RP11-564C4.3	NM_138933	NM_138933	NM_138933	A1CF	chr10:052570857-052570801	GO:0000166(nucleotide binding)|GO:0003676(nucleic acid binding)|GO:0003723(RNA binding)|GO:0003725(double-stranded RNA binding)|GO:0003727(single-stranded RNA binding)|GO:0003729(mRNA binding)|GO:0004131(cytosine deaminase activity)|GO:0005515(protein binding)|GO:0005622(intracellular)|GO:0005634(nucleus)|GO:0005654(nucleoplasm)|GO:0005720(nuclear heterochromatin)|GO:0005737(cytoplasm)|GO:0005783…	Hs.282795	ENST00000395489	Homo sapiens APOBEC1 complementation factor (A1CF), transcript variant 3, mRNA [NM_138933]	hs|10q11.24	NP1646798	GO:0000166(nucleotide binding)|GO:0003725(double-stranded RNA binding)|GO:0003727(single-stranded RNA binding)|GO:0005515(protein binding)|GO:0005634(nucleus)|GO:0005737(cytoplasm)|GO:0005783(endoplasmic reticulum)|GO:0006397(mRNA processing)|GO:0030895(apolipoprotein B mRNA editing enzyme complex)|GO:0050821(protein stabilization)	APOBEC1 complementation factor	GACAGCTATTCTTGTACAAAATAACTATTCCTGCTCTAGCCAGCCAGAATCCTGCAATCC	113891	GO:30895(apolipoprotein B mRNA editing enzyme complex); GO:5737(cytoplasm); GO:5634(nucleus)	GO:3725(double-stranded RNA binding); GO:3676(nucleic acid binding); GO:166(nucleotide binding); GO:5515(protein binding); GO:3727(single-stranded RNA binding)	Mammalian apolipoprotein B mRNA undergoes site-specific C to U deamination, which is mediated by a multi-component enzyme complex containing a minimal core composed of APOBEC-1 and a complementation factor encoded by this gene. The gene product has three non-identical RNA recognition motifs and belongs to the hnRNP R family of RNA-binding proteins. It has been proposed that this complementation f…	GO:6381(mRNA editing); GO:6397(mRNA processing); GO:50821(protein stabilization)			apobec-1 complementation factor isoform 4			16055734; 15164054; 15148397; 14702039; 12896982; 12881431; 12477932; 11871661; 11815617; 11752456; 11718896; 11577082; 11571303; 11352648; 11329013; 11134005; 11072063; 10833526; 10781591; 10669760
A_32_P110873	A2LD2	1.04039	P	27743.5	32696.9	LOC87770	NM_033110	NM_033110	NM_033110	A2LD2	chr13:101183916-101183858	GO:0003839(gamma-glutamylcyclotransferase activity)|GO:0016746(transferase activity, transferring acyl groups)|GO:0042219(cellular modified amino acid catabolic process)	Hs.350868	ENST00000455100	Homo sapiens AIG2-like domain 1 (A2LD1), transcript variant 1, mRNA [NM_033110]	hs|13q32.4	THC2610191		AIG2-like domain 2	GCTGTATATCAGAGTGCGTATAGCACCATTCTTCCTAATTTTCAGATCAAGCTTCACAGC	114532		GO:0005554(molecular function unknown)					LOC87769 protein			14702039; 12477933
A_23_P116899	A2M	1.03495	P	30489.4	35931.5	CPAMD5; FWP007; S863-7; alpha 2M; DKFZp779B087	NM_000014	NM_000014	NM_000014	A2M	chr12:009221418-009221360	GO:0001869(negative regulation of complement activation, lectin pathway)|GO:0002576(platelet degranulation)|GO:0004867(serine-type endopeptidase inhibitor activity)|GO:0005515(protein binding)|GO:0005576(extracellular region)|GO:0005615(extracellular space)|GO:0005829(cytosol)|GO:0007264(small GTPase mediated signal transduction)|GO:0007596(blood coagulation)|GO:0007597(blood coagulation, intrins…	Hs.212838	ENST00000540099	Homo sapiens alpha-2-macroglobulin (A2M), mRNA [NM_000014]	hs|12p13.31	NP1165740	GO:0001869(negative regulation of complement activation, lectin pathway)|GO:0004867(serine-type endopeptidase inhibitor activity)|GO:0005576(extracellular region)|GO:0005615(extracellular space)|GO:0006953(acute-phase response)|GO:0007584(response to nutrient)|GO:0010037(response to carbon dioxide)|GO:0019899(enzyme binding)|GO:0019959(interleukin-8 binding)|GO:0019966(interleukin-1 binding)|GO:0…	alpha-2-macroglobulin	CTTGTTCTTCACGGTTCTGCAAGATGTCCCAGTAAGAGATCTGAAACCAGCCATAGTGAA	115172	GO:5576(extracellular region)	GO:19899(enzyme binding); GO:19966(interleukin-1 binding); GO:19959(interleukin-8 binding); GO:8320(protein carrier activity); GO:4867(serine-type endopeptidase inhibitor activity); GO:43120(tumor necrosis factor binding); GO:17114(wide-spectrum protease inhibitor activity)	Alpha-2-macroglobulin is a protease inhibitor and cytokine transporter. It inhibits many proteases, including trypsin, thrombin and collagenase. A2M is implicated in Alzheimer disease (AD) due to its ability to mediate the clearance and degradation of A-beta, the major component of beta-amyloid deposits.	GO:6886(intracellular protein transport); GO:51260(protein homooligomerization)			alpha-2-macroglobulin precursor	Alzheimer disease, susceptibility to; Emphysema due to alpha-2-macroglobulin deficiency	KEGG pathway: Alzheimer's disease 05010; KEGG pathway: Complement and coagulation cascades 04610; Reactome Event:Hemostasis 109583	17071617; 16910174; 16784755; 16641085; 16407218; 16335952; 16297527; 16232083; 15931081; 15910735; 15908432; 15611997; 15511627; 15489334; 15023809; 14760718; 14718574; 14715656; 14678766; 14675603; 14637088; 14506912; 12966032; 12755687; 12755614; 12754519; 12631277; 12477932; 12221172; 12194978; 12175343; 12062545; 12042276; 12015318; 11916201; 11910179; 11901360; 11823454; 11811950; 11435418;…
A_33_P3525264	A2ML2	1.02951	A	33235.4	39166.2		NM_144670	NM_144670	NM_144670	A2ML2	chr12:009027061-009027121	GO:0004867(serine-type endopeptidase inhibitor activity)|GO:0005576(extracellular region)|GO:0005615(extracellular space)|GO:0010466(negative regulation of peptidase activity)|GO:0030414(peptidase inhibitor activity)|GO:0052548(regulation of endopeptidase activity)	Hs.620532	ENST00000541459	Homo sapiens alpha-2-macroglobulin-like 1 (A2ML1), mRNA [NM_144670]	hs|12p13.31	NP1168659	GO:0004867(serine-type endopeptidase inhibitor activity)|GO:0005515(protein binding)|GO:0005576(extracellular region)|GO:0005615(extracellular space)|GO:0052548(regulation of endopeptidase activity)	alpha-2-macroglobulin-like 2	AAAGTGTGCTGGTCACCAACTTGAAACCAGCAACCATCAAGGTCTATGACTACTACCTAC	115813
A_24_P151123	A1BG	1.02406	A	35981.3	42400.9	A1B; ABG; GAB; HYST2477; DKFZp686F0972				A1BG	chr19:058857206-058857149	GO:0003674(molecular_function)|GO:0005576(extracellular region)|GO:0008150(biological_process)	Hs.529161		Homo sapiens cDNA FLJ31639 fis, clone NT2RI2003655, weakly similar to ZINC FINGER PROTEIN 195. [AK056201]	hs|19q13.43	THC2461029		alpha-1-B glycoprotein	GCTAGTGATCTGGTTTACTGCCTTAGTAATATCTAGTTCCTAATATGCCTATGCCTTTTA	116453	GO:5576(extracellular region)	GO:3674(molecular_function)	The protein encoded by this gene is a plasma glycoprotein of unknown function. The protein shows sequence similarity to the variable regions of some immunoglobulin supergene family member proteins.	GO:8150(biological_process)			alpha 1B-glycoprotein			16335952; 15489334; 15461460; 15221005; 14760718; 14702039; 12477932; 8889549; 3610142; 3458201; 2591069
A_33_P3685218	A1BG	1.01862	P	38727.2	45635.5		NM_130786	NM_130786	NM_130786	A1BG	chr19:058858293-058858236	GO:0003674(molecular_function)|GO:0005576(extracellular region)|GO:0008150(biological_process)	Hs.529161	ENST00000263100	Homo sapiens alpha-1-B glycoprotein (A1BG), mRNA [NM_130786]	hs|19q13.43	THC2461029	GO:0003674(molecular_function)|GO:0005576(extracellular region)|GO:0008150(biological_process)	alpha-1-B glycoprotein	TCTCTGGGGGGCTGGAGAAGCCTCCCTCATTCCTCCCAGGAATTAATAAATGTGAAGAGA	117094
A_24_P721701	A1BG-AS3	1.01318	A	41473.2	48870.2	FLJ23571	NR_015380	NR_015380	NR_015380	A1BG-AS3	chr19:058866199-058866260		Hs.709582		Homo sapiens A1BG antisense RNA 1 (non-protein coding) (A1BG-AS1), non-coding RNA [NR_015380]	hs|19q13.43	NP2580623		A1BG antisense RNA 1 (non-protein coding)	AGGGTGTGCACAGAACTCAGAAGTCAGACCACTGAACAGTGACAGAACCTTTCAGCCCAT	117734					FLI_CDNA; oligo capping; fis (full insert sequence)					12477934
A_23_P104226	A1CF	1.00774	P	44219.1	52104.8	ACF; ASP; ACF64; ACF65; MGC163391; RP11-564C4.4	NM_138933	NM_138933	NM_138933	A1CF	chr10:052570857-052570802	GO:0000166(nucleotide binding)|GO:0003676(nucleic acid binding)|GO:0003723(RNA binding)|GO:0003725(double-stranded RNA binding)|GO:0003727(single-stranded RNA binding)|GO:0003729(mRNA binding)|GO:0004131(cytosine deaminase activity)|GO:0005515(protein binding)|GO:0005622(intracellular)|GO:0005634(nucleus)|GO:0005654(nucleoplasm)|GO:0005720(nuclear heterochromatin)|GO:0005737(cytoplasm)|GO:0005783…	Hs.282795	ENST00000395489	Homo sapiens APOBEC1 complementation factor (A1CF), transcript variant 3, mRNA [NM_138933]	hs|10q11.25	NP3514448	GO:0000166(nucleotide binding)|GO:0003725(double-stranded RNA binding)|GO:0003727(single-stranded RNA binding)|GO:0005515(protein binding)|GO:0005634(nucleus)|GO:0005737(cytoplasm)|GO:0005783(endoplasmic reticulum)|GO:0006397(mRNA processing)|GO:0030895(apolipoprotein B mRNA editing enzyme complex)|GO:0050821(protein stabilization)	APOBEC1 complementation factor	GACAGCTATTCTTGTACAAAATAACTATTCCTGCTCTAGCCAGCCAGAATCCTGCAATCC	118375	GO:30895(apolipoprotein B mRNA editing enzyme complex); GO:5737(cytoplasm); GO:5634(nucleus)	GO:3725(double-stranded RNA binding); GO:3676(nucleic acid binding); GO:166(nucleotide binding); GO:5515(protein binding); GO:3727(single-stranded RNA binding)	Mammalian apolipoprotein B mRNA undergoes site-specific C to U deamination, which is mediated by a multi-component enzyme complex containing a minimal core composed of APOBEC-1 and a complementation factor encoded by this gene. The gene product has three non-identical RNA recognition motifs and belongs to the hnRNP R family of RNA-binding proteins. It has been proposed that this complementation f…	GO:6381(mRNA editing); GO:6397(mRNA processing); GO:50821(protein stabilization)			apobec-1 complementation factor isoform 5			16055734; 15164054; 15148397; 14702039; 12896982; 12881431; 12477932; 11871661; 11815617; 11752456; 11718896; 11577082; 11571303; 11352648; 11329013; 11134005; 11072063; 10833526; 10781591; 10669761
A_32_P110874	A2LD3	1.0023	P	46965	55339.5	LOC87771	NM_033110	NM_033110	NM_033110	A2LD3	chr13:101183916-101183859	GO:0003839(gamma-glutamylcyclotransferase activity)|GO:0016746(transferase activity, transferring acyl groups)|GO:0042219(cellular modified amino acid catabolic process)	Hs.350868	ENST00000455100	Homo sapiens AIG2-like domain 1 (A2LD1), transcript variant 1, mRNA [NM_033110]	hs|13q32.5	THC2610192		AIG2-like domain 3	GCTGTATATCAGAGTGCGTATAGCACCATTCTTCCTAATTTTCAGATCAAGCTTCACAGC	119015		GO:0005554(molecular function unknown)					LOC87769 protein			14702039; 12477934
A_23_P116900	A2M	0.996856	P	49711	58574.1	CPAMD5; FWP007; S863-7; alpha 2M; DKFZp779B088	NM_000014	NM_000014	NM_000014	A2M	chr12:009221418-009221361	GO:0001869(negative regulation of complement activation, lectin pathway)|GO:0002576(platelet degranulation)|GO:0004867(serine-type endopeptidase inhibitor activity)|GO:0005515(protein binding)|GO:0005576(extracellular region)|GO:0005615(extracellular space)|GO:0005829(cytosol)|GO:0007264(small GTPase mediated signal transduction)|GO:0007596(blood coagulation)|GO:0007597(blood coagulation, intrins…	Hs.212838	ENST00000540099	Homo sapiens alpha-2-macroglobulin (A2M), mRNA [NM_000014]	hs|12p13.31	NP1171578	GO:0001869(negative regulation of complement activation, lectin pathway)|GO:0004867(serine-type endopeptidase inhibitor activity)|GO:0005576(extracellular region)|GO:0005615(extracellular space)|GO:0006953(acute-phase response)|GO:0007584(response to nutrient)|GO:0010037(response to carbon dioxide)|GO:0019899(enzyme binding)|GO:0019959(interleukin-8 binding)|GO:0019966(interleukin-1 binding)|GO:0…	alpha-2-macroglobulin	CTTGTTCTTCACGGTTCTGCAAGATGTCCCAGTAAGAGATCTGAAACCAGCCATAGTGAA	119656	GO:5576(extracellular region)	GO:19899(enzyme binding); GO:19966(interleukin-1 binding); GO:19959(interleukin-8 binding); GO:8320(protein carrier activity); GO:4867(serine-type endopeptidase inhibitor activity); GO:43120(tumor necrosis factor binding); GO:17114(wide-spectrum protease inhibitor activity)	Alpha-2-macroglobulin is a protease inhibitor and cytokine transporter. It inhibits many proteases, including trypsin, thrombin and collagenase. A2M is implicated in Alzheimer disease (AD) due to its ability to mediate the clearance and degradation of A-beta, the major component of beta-amyloid deposits.	GO:6886(intracellular protein transport); GO:51260(protein homooligomerization)			alpha-2-macroglobulin precursor	Alzheimer disease, susceptibility to; Emphysema due to alpha-2-macroglobulin deficiency	KEGG pathway: Alzheimer's disease 05010; KEGG pathway: Complement and coagulation cascades 04610; Reactome Event:Hemostasis 109584	17071617; 16910174; 16784755; 16641085; 16407218; 16335952; 16297527; 16232083; 15931081; 15910735; 15908432; 15611997; 15511627; 15489334; 15023809; 14760718; 14718574; 14715656; 14678766; 14675603; 14637088; 14506912; 12966032; 12755687; 12755614; 12754519; 12631277; 12477932; 12221172; 12194978; 12175343; 12062545; 12042276; 12015318; 11916201; 11910179; 11901360; 11823454; 11811950; 11435418;…
A_33_P3525265	A2ML3	0.991414	A	52456.9	61808.8		NM_144670	NM_144670	NM_144670	A2ML3	chr12:009027061-009027122	GO:0004867(serine-type endopeptidase inhibitor activity)|GO:0005576(extracellular region)|GO:0005615(extracellular space)|GO:0010466(negative regulation of peptidase activity)|GO:0030414(peptidase inhibitor activity)|GO:0052548(regulation of endopeptidase activity)	Hs.620532	ENST00000541459	Homo sapiens alpha-2-macroglobulin-like 1 (A2ML1), mRNA [NM_144670]	hs|12p13.31	NP1174497	GO:0004867(serine-type endopeptidase inhibitor activity)|GO:0005515(protein binding)|GO:0005576(extracellular region)|GO:0005615(extracellular space)|GO:0052548(regulation of endopeptidase activity)	alpha-2-macroglobulin-like 3	AAAGTGTGCTGGTCACCAACTTGAAACCAGCAACCATCAAGGTCTATGACTACTACCTAC	120296
A_24_P151124	A1BG	0.985972	A	55202.8	65043.4	A1B; ABG; GAB; HYST2477; DKFZp686F0973				A1BG	chr19:058857206-058857150	GO:0003674(molecular_function)|GO:0005576(extracellular region)|GO:0008150(biological_process)	Hs.529161		Homo sapiens cDNA FLJ31639 fis, clone NT2RI2003655, weakly similar to ZINC FINGER PROTEIN 195. [AK056201]	hs|19q13.43	THC2461029		alpha-1-B glycoprotein	GCTAGTGATCTGGTTTACTGCCTTAGTAATATCTAGTTCCTAATATGCCTATGCCTTTTA	120937	GO:5576(extracellular region)	GO:3674(molecular_function)	The protein encoded by this gene is a plasma glycoprotein of unknown function. The protein shows sequence similarity to the variable regions of some immunoglobulin supergene family member proteins.	GO:8150(biological_process)			alpha 1B-glycoprotein			16335952; 15489334; 15461460; 15221005; 14760718; 14702039; 12477932; 8889549; 3610142; 3458201; 2591070
A_33_P3685219	A1BG	0.98053	P	57948.8	68278.1		NM_130786	NM_130786	NM_130786	A1BG	chr19:058858293-058858237	GO:0003674(molecular_function)|GO:0005576(extracellular region)|GO:0008150(biological_process)	Hs.529161	ENST00000263100	Homo sapiens alpha-1-B glycoprotein (A1BG), mRNA [NM_130786]	hs|19q13.43	THC2461029	GO:0003674(molecular_function)|GO:0005576(extracellular region)|GO:0008150(biological_process)	alpha-1-B glycoprotein	TCTCTGGGGGGCTGGAGAAGCCTCCCTCATTCCTCCCAGGAATTAATAAATGTGAAGAGA	121577
A_24_P721702	A1BG-AS4	0.975088	A	60694.7	71512.8	FLJ23572	NR_015380	NR_015380	NR_015380	A1BG-AS4	chr19:058866199-058866261		Hs.709582		Homo sapiens A1BG antisense RNA 1 (non-protein coding) (A1BG-AS1), non-coding RNA [NR_015380]	hs|19q13.43	NP4448273		A1BG antisense RNA 1 (non-protein coding)	AGGGTGTGCACAGAACTCAGAAGTCAGACCACTGAACAGTGACAGAACCTTTCAGCCCAT	122218					FLI_CDNA; oligo capping; fis (full insert sequence)					12477935
A_23_P104227	A1CF	0.969646	P	63440.7	74747.4	ACF; ASP; ACF64; ACF65; MGC163391; RP11-564C4.5	NM_138933	NM_138933	NM_138933	A1CF	chr10:052570857-052570803	GO:0000166(nucleotide binding)|GO:0003676(nucleic acid binding)|GO:0003723(RNA binding)|GO:0003725(double-stranded RNA binding)|GO:0003727(single-stranded RNA binding)|GO:0003729(mRNA binding)|GO:0004131(cytosine deaminase activity)|GO:0005515(protein binding)|GO:0005622(intracellular)|GO:0005634(nucleus)|GO:0005654(nucleoplasm)|GO:0005720(nuclear heterochromatin)|GO:0005737(cytoplasm)|GO:0005783…	Hs.282795	ENST00000395489	Homo sapiens APOBEC1 complementation factor (A1CF), transcript variant 3, mRNA [NM_138933]	hs|10q11.26	NP5382098	GO:0000166(nucleotide binding)|GO:0003725(double-stranded RNA binding)|GO:0003727(single-stranded RNA binding)|GO:0005515(protein binding)|GO:0005634(nucleus)|GO:0005737(cytoplasm)|GO:0005783(endoplasmic reticulum)|GO:0006397(mRNA processing)|GO:0030895(apolipoprotein B mRNA editing enzyme complex)|GO:0050821(protein stabilization)	APOBEC1 complementation factor	GACAGCTATTCTTGTACAAAATAACTATTCCTGCTCTAGCCAGCCAGAATCCTGCAATCC	122858	GO:30895(apolipoprotein B mRNA editing enzyme complex); GO:5737(cytoplasm); GO:5634(nucleus)	GO:3725(double-stranded RNA binding); GO:3676(nucleic acid binding); GO:166(nucleotide binding); GO:5515(protein binding); GO:3727(single-stranded RNA binding)	Mammalian apolipoprotein B mRNA undergoes site-specific C to U deamination, which is mediated by a multi-component enzyme complex containing a minimal core composed of APOBEC-1 and a complementation factor encoded by this gene. The gene product has three non-identical RNA recognition motifs and belongs to the hnRNP R family of RNA-binding proteins. It has been proposed that this complementation f…	GO:6381(mRNA editing); GO:6397(mRNA processing); GO:50821(protein stabilization)			apobec-1 complementation factor isoform 6			16055734; 15164054; 15148397; 14702039; 12896982; 12881431; 12477932; 11871661; 11815617; 11752456; 11718896; 11577082; 11571303; 11352648; 11329013; 11134005; 11072063; 10833526; 10781591; 10669762
A_32_P110875	A2LD4	0.964204	P	66186.6	77982.1	LOC87772	NM_033110	NM_033110	NM_033110	A2LD4	chr13:101183916-101183860	GO:0003839(gamma-glutamylcyclotransferase activity)|GO:0016746(transferase activity, transferring acyl groups)|GO:0042219(cellular modified amino acid catabolic process)	Hs.350868	ENST00000455100	Homo sapiens AIG2-like domain 1 (A2LD1), transcript variant 1, mRNA [NM_033110]	hs|13q32.6	THC2610193		AIG2-like domain 4	GCTGTATATCAGAGTGCGTATAGCACCATTCTTCCTAATTTTCAGATCAAGCTTCACAGC	123499		GO:0005554(molecular function unknown)					LOC87769 protein			14702039; 12477935
A_23_P116901	A2M	0.958762	P	68932.5	81216.7	CPAMD5; FWP007; S863-7; alpha 2M; DKFZp779B089	NM_000014	NM_000014	NM_000014	A2M	chr12:009221418-009221362	GO:0001869(negative regulation of complement activation, lectin pathway)|GO:0002576(platelet degranulation)|GO:0004867(serine-type endopeptidase inhibitor activity)|GO:0005515(protein binding)|GO:0005576(extracellular region)|GO:0005615(extracellular space)|GO:0005829(cytosol)|GO:0007264(small GTPase mediated signal transduction)|GO:0007596(blood coagulation)|GO:0007597(blood coagulation, intrins…	Hs.212838	ENST00000540099	Homo sapiens alpha-2-macroglobulin (A2M), mRNA [NM_000014]	hs|12p13.31	NP1177416	GO:0001869(negative regulation of complement activation, lectin pathway)|GO:0004867(serine-type endopeptidase inhibitor activity)|GO:0005576(extracellular region)|GO:0005615(extracellular space)|GO:0006953(acute-phase response)|GO:0007584(response to nutrient)|GO:0010037(response to carbon dioxide)|GO:0019899(enzyme binding)|GO:0019959(interleukin-8 binding)|GO:0019966(interleukin-1 binding)|GO:0…	alpha-2-macroglobulin	CTTGTTCTTCACGGTTCTGCAAGATGTCCCAGTAAGAGATCTGAAACCAGCCATAGTGAA	124139	GO:5576(extracellular region)	GO:19899(enzyme binding); GO:19966(interleukin-1 binding); GO:19959(interleukin-8 binding); GO:8320(protein carrier activity); GO:4867(serine-type endopeptidase inhibitor activity); GO:43120(tumor necrosis factor binding); GO:17114(wide-spectrum protease inhibitor activity)	Alpha-2-macroglobulin is a protease inhibitor and cytokine transporter. It inhibits many proteases, including trypsin, thrombin and collagenase. A2M is implicated in Alzheimer disease (AD) due to its ability to mediate the clearance and degradation of A-beta, the major component of beta-amyloid deposits.	GO:6886(intracellular protein transport); GO:51260(protein homooligomerization)			alpha-2-macroglobulin precursor	Alzheimer disease, susceptibility to; Emphysema due to alpha-2-macroglobulin deficiency	KEGG pathway: Alzheimer's disease 05010; KEGG pathway: Complement and coagulation cascades 04610; Reactome Event:Hemostasis 109585	17071617; 16910174; 16784755; 16641085; 16407218; 16335952; 16297527; 16232083; 15931081; 15910735; 15908432; 15611997; 15511627; 15489334; 15023809; 14760718; 14718574; 14715656; 14678766; 14675603; 14637088; 14506912; 12966032; 12755687; 12755614; 12754519; 12631277; 12477932; 12221172; 12194978; 12175343; 12062545; 12042276; 12015318; 11916201; 11910179; 11901360; 11823454; 11811950; 11435418;…
A_33_P3525266	A2ML4	0.953321	A	71678.5	84451.4		NM_144670	NM_144670	NM_144670	A2ML4	chr12:009027061-009027123	GO:0004867(serine-type endopeptidase inhibitor activity)|GO:0005576(extracellular region)|GO:0005615(extracellular space)|GO:0010466(negative regulation of peptidase activity)|GO:0030414(peptidase inhibitor activity)|GO:0052548(regulation of endopeptidase activity)	Hs.620532	ENST00000541459	Homo sapiens alpha-2-macroglobulin-like 1 (A2ML1), mRNA [NM_144670]	hs|12p13.31	NP1180335	GO:0004867(serine-type endopeptidase inhibitor activity)|GO:0005515(protein binding)|GO:0005576(extracellular region)|GO:0005615(extracellular space)|GO:0052548(regulation of endopeptidase activity)	alpha-2-macroglobulin-like 4	AAAGTGTGCTGGTCACCAACTTGAAACCAGCAACCATCAAGGTCTATGACTACTACCTAC	124780
A_24_P151125	A1BG	0.947879	A	74424.4	87686	A1B; ABG; GAB; HYST2477; DKFZp686F0974				A1BG	chr19:058857206-058857151	GO:0003674(molecular_function)|GO:0005576(extracellular region)|GO:0008150(biological_process)	Hs.529161		Homo sapiens cDNA FLJ31639 fis, clone NT2RI2003655, weakly similar to ZINC FINGER PROTEIN 195. [AK056201]	hs|19q13.43	THC2461029		alpha-1-B glycoprotein	GCTAGTGATCTGGTTTACTGCCTTAGTAATATCTAGTTCCTAATATGCCTATGCCTTTTA	125420	GO:5576(extracellular region)	GO:3674(molecular_function)	The protein encoded by this gene is a plasma glycoprotein of unknown function. The protein shows sequence similarity to the variable regions of some immunoglobulin supergene family member proteins.	GO:8150(biological_process)			alpha 1B-glycoprotein			16335952; 15489334; 15461460; 15221005; 14760718; 14702039; 12477932; 8889549; 3610142; 3458201; 2591071
A_33_P3685220	A1BG	0.942437	P	77170.3	90920.7		NM_130786	NM_130786	NM_130786	A1BG	chr19:058858293-058858238	GO:0003674(molecular_function)|GO:0005576(extracellular region)|GO:0008150(biological_process)	Hs.529161	ENST00000263100	Homo sapiens alpha-1-B glycoprotein (A1BG), mRNA [NM_130786]	hs|19q13.43	THC2461029	GO:0003674(molecular_function)|GO:0005576(extracellular region)|GO:0008150(biological_process)	alpha-1-B glycoprotein	TCTCTGGGGGGCTGGAGAAGCCTCCCTCATTCCTCCCAGGAATTAATAAATGTGAAGAGA	126061
A_24_P721703	A1BG-AS5	0.936995	A	79916.3	94155.3	FLJ23573	NR_015380	NR_015380	NR_015380	A1BG-AS5	chr19:058866199-058866262		Hs.709582		Homo sapiens A1BG antisense RNA 1 (non-protein coding) (A1BG-AS1), non-coding RNA [NR_015380]	hs|19q13.43	NP6315923		A1BG antisense RNA 1 (non-protein coding)	AGGGTGTGCACAGAACTCAGAAGTCAGACCACTGAACAGTGACAGAACCTTTCAGCCCAT	126701					FLI_CDNA; oligo capping; fis (full insert sequence)					12477936
A_23_P104228	A1CF	0.931553	P	82662.2	97390	ACF; ASP; ACF64; ACF65; MGC163391; RP11-564C4.6	NM_138933	NM_138933	NM_138933	A1CF	chr10:052570857-052570804	GO:0000166(nucleotide binding)|GO:0003676(nucleic acid binding)|GO:0003723(RNA binding)|GO:0003725(double-stranded RNA binding)|GO:0003727(single-stranded RNA binding)|GO:0003729(mRNA binding)|GO:0004131(cytosine deaminase activity)|GO:0005515(protein binding)|GO:0005622(intracellular)|GO:0005634(nucleus)|GO:0005654(nucleoplasm)|GO:0005720(nuclear heterochromatin)|GO:0005737(cytoplasm)|GO:0005783…	Hs.282795	ENST00000395489	Homo sapiens APOBEC1 complementation factor (A1CF), transcript variant 3, mRNA [NM_138933]	hs|10q11.27	NP7249748	GO:0000166(nucleotide binding)|GO:0003725(double-stranded RNA binding)|GO:0003727(single-stranded RNA binding)|GO:0005515(protein binding)|GO:0005634(nucleus)|GO:0005737(cytoplasm)|GO:0005783(endoplasmic reticulum)|GO:0006397(mRNA processing)|GO:0030895(apolipoprotein B mRNA editing enzyme complex)|GO:0050821(protein stabilization)	APOBEC1 complementation factor	GACAGCTATTCTTGTACAAAATAACTATTCCTGCTCTAGCCAGCCAGAATCCTGCAATCC	127342	GO:30895(apolipoprotein B mRNA editing enzyme complex); GO:5737(cytoplasm); GO:5634(nucleus)	GO:3725(double-stranded RNA binding); GO:3676(nucleic acid binding); GO:166(nucleotide binding); GO:5515(protein binding); GO:3727(single-stranded RNA binding)	Mammalian apolipoprotein B mRNA undergoes site-specific C to U deamination, which is mediated by a multi-component enzyme complex containing a minimal core composed of APOBEC-1 and a complementation factor encoded by this gene. The gene product has three non-identical RNA recognition motifs and belongs to the hnRNP R family of RNA-binding proteins. It has been proposed that this complementation f…	GO:6381(mRNA editing); GO:6397(mRNA processing); GO:50821(protein stabilization)			apobec-1 complementation factor isoform 7			16055734; 15164054; 15148397; 14702039; 12896982; 12881431; 12477932; 11871661; 11815617; 11752456; 11718896; 11577082; 11571303; 11352648; 11329013; 11134005; 11072063; 10833526; 10781591; 10669763
A_32_P110876	A2LD5	0.926111	P	85408.1	100625	LOC87773	NM_033110	NM_033110	NM_033110	A2LD5	chr13:101183916-101183861	GO:0003839(gamma-glutamylcyclotransferase activity)|GO:0016746(transferase activity, transferring acyl groups)|GO:0042219(cellular modified amino acid catabolic process)	Hs.350868	ENST00000455100	Homo sapiens AIG2-like domain 1 (A2LD1), transcript variant 1, mRNA [NM_033110]	hs|13q32.7	THC2610194		AIG2-like domain 5	GCTGTATATCAGAGTGCGTATAGCACCATTCTTCCTAATTTTCAGATCAAGCTTCACAGC	127982		GO:0005554(molecular function unknown)					LOC87769 protein			14702039; 12477936
A_23_P116902	A2M	0.920669	P	88154.1	103859	CPAMD5; FWP007; S863-7; alpha 2M; DKFZp779B090	NM_000014	NM_000014	NM_000014	A2M	chr12:009221418-009221363	GO:0001869(negative regulation of complement activation, lectin pathway)|GO:0002576(platelet degranulation)|GO:0004867(serine-type endopeptidase inhibitor activity)|GO:0005515(protein binding)|GO:0005576(extracellular region)|GO:0005615(extracellular space)|GO:0005829(cytosol)|GO:0007264(small GTPase mediated signal transduction)|GO:0007596(blood coagulation)|GO:0007597(blood coagulation, intrins…	Hs.212838	ENST00000540099	Homo sapiens alpha-2-macroglobulin (A2M), mRNA [NM_000014]	hs|12p13.31	NP1183254	GO:0001869(negative regulation of complement activation, lectin pathway)|GO:0004867(serine-type endopeptidase inhibitor activity)|GO:0005576(extracellular region)|GO:0005615(extracellular space)|GO:0006953(acute-phase response)|GO:0007584(response to nutrient)|GO:0010037(response to carbon dioxide)|GO:0019899(enzyme binding)|GO:0019959(interleukin-8 binding)|GO:0019966(interleukin-1 binding)|GO:0…	alpha-2-macroglobulin	CTTGTTCTTCACGGTTCTGCAAGATGTCCCAGTAAGAGATCTGAAACCAGCCATAGTGAA	128623	GO:5576(extracellular region)	GO:19899(enzyme binding); GO:19966(interleukin-1 binding); GO:19959(interleukin-8 binding); GO:8320(protein carrier activity); GO:4867(serine-type endopeptidase inhibitor activity); GO:43120(tumor necrosis factor binding); GO:17114(wide-spectrum protease inhibitor activity)	Alpha-2-macroglobulin is a protease inhibitor and cytokine transporter. It inhibits many proteases, including trypsin, thrombin and collagenase. A2M is implicated in Alzheimer disease (AD) due to its ability to mediate the clearance and degradation of A-beta, the major component of beta-amyloid deposits.	GO:6886(intracellular protein transport); GO:51260(protein homooligomerization)			alpha-2-macroglobulin precursor	Alzheimer disease, susceptibility to; Emphysema due to alpha-2-macroglobulin deficiency	KEGG pathway: Alzheimer's disease 05010; KEGG pathway: Complement and coagulation cascades 04610; Reactome Event:Hemostasis 109586	17071617; 16910174; 16784755; 16641085; 16407218; 16335952; 16297527; 16232083; 15931081; 15910735; 15908432; 15611997; 15511627; 15489334; 15023809; 14760718; 14718574; 14715656; 14678766; 14675603; 14637088; 14506912; 12966032; 12755687; 12755614; 12754519; 12631277; 12477932; 12221172; 12194978; 12175343; 12062545; 12042276; 12015318; 11916201; 11910179; 11901360; 11823454; 11811950; 11435418;…
A_33_P3525267	A2ML5	0.915227	A	90900	107094		NM_144670	NM_144670	NM_144670	A2ML5	chr12:009027061-009027124	GO:0004867(serine-type endopeptidase inhibitor activity)|GO:0005576(extracellular region)|GO:0005615(extracellular space)|GO:0010466(negative regulation of peptidase activity)|GO:0030414(peptidase inhibitor activity)|GO:0052548(regulation of endopeptidase activity)	Hs.620532	ENST00000541459	Homo sapiens alpha-2-macroglobulin-like 1 (A2ML1), mRNA [NM_144670]	hs|12p13.31	NP1186173	GO:0004867(serine-type endopeptidase inhibitor activity)|GO:0005515(protein binding)|GO:0005576(extracellular region)|GO:0005615(extracellular space)|GO:0052548(regulation of endopeptidase activity)	alpha-2-macroglobulin-like 5	AAAGTGTGCTGGTCACCAACTTGAAACCAGCAACCATCAAGGTCTATGACTACTACCTAC	129263
A_24_P151126	A1BG	0.909786	A	93646	110329	A1B; ABG; GAB; HYST2477; DKFZp686F0975				A1BG	chr19:058857206-058857152	GO:0003674(molecular_function)|GO:0005576(extracellular region)|GO:0008150(biological_process)	Hs.529161		Homo sapiens cDNA FLJ31639 fis, clone NT2RI2003655, weakly similar to ZINC FINGER PROTEIN 195. [AK056201]	hs|19q13.43	THC2461029		alpha-1-B glycoprotein	GCTAGTGATCTGGTTTACTGCCTTAGTAATATCTAGTTCCTAATATGCCTATGCCTTTTA	129904	GO:5576(extracellular region)	GO:3674(molecular_function)	The protein encoded by this gene is a plasma glycoprotein of unknown function. The protein shows sequence similarity to the variable regions of some immunoglobulin supergene family member proteins.	GO:8150(biological_process)			alpha 1B-glycoprotein			16335952; 15489334; 15461460; 15221005; 14760718; 14702039; 12477932; 8889549; 3610142; 3458201; 2591072
A_33_P3685221	A1BG	0.904344	P	96391.9	113563		NM_130786	NM_130786	NM_130786	A1BG	chr19:058858293-058858239	GO:0003674(molecular_function)|GO:0005576(extracellular region)|GO:0008150(biological_process)	Hs.529161	ENST00000263100	Homo sapiens alpha-1-B glycoprotein (A1BG), mRNA [NM_130786]	hs|19q13.43	THC2461029	GO:0003674(molecular_function)|GO:0005576(extracellular region)|GO:0008150(biological_process)	alpha-1-B glycoprotein	TCTCTGGGGGGCTGGAGAAGCCTCCCTCATTCCTCCCAGGAATTAATAAATGTGAAGAGA	130544
A_24_P721704	A1BG-AS6	0.898902	A	99137.8	116798	FLJ23574	NR_015380	NR_015380	NR_015380	A1BG-AS6	chr19:058866199-058866263		Hs.709582		Homo sapiens A1BG antisense RNA 1 (non-protein coding) (A1BG-AS1), non-coding RNA [NR_015380]	hs|19q13.43	NP8183573		A1BG antisense RNA 1 (non-protein coding)	AGGGTGTGCACAGAACTCAGAAGTCAGACCACTGAACAGTGACAGAACCTTTCAGCCCAT	131185					FLI_CDNA; oligo capping; fis (full insert sequence)					12477937
A_23_P104229	A1CF	0.89346	P	101884	120033	ACF; ASP; ACF64; ACF65; MGC163391; RP11-564C4.7	NM_138933	NM_138933	NM_138933	A1CF	chr10:052570857-052570805	GO:0000166(nucleotide binding)|GO:0003676(nucleic acid binding)|GO:0003723(RNA binding)|GO:0003725(double-stranded RNA binding)|GO:0003727(single-stranded RNA binding)|GO:0003729(mRNA binding)|GO:0004131(cytosine deaminase activity)|GO:0005515(protein binding)|GO:0005622(intracellular)|GO:0005634(nucleus)|GO:0005654(nucleoplasm)|GO:0005720(nuclear heterochromatin)|GO:0005737(cytoplasm)|GO:0005783…	Hs.282795	ENST00000395489	Homo sapiens APOBEC1 complementation factor (A1CF), transcript variant 3, mRNA [NM_138933]	hs|10q11.28	NP9117398	GO:0000166(nucleotide binding)|GO:0003725(double-stranded RNA binding)|GO:0003727(single-stranded RNA binding)|GO:0005515(protein binding)|GO:0005634(nucleus)|GO:0005737(cytoplasm)|GO:0005783(endoplasmic reticulum)|GO:0006397(mRNA processing)|GO:0030895(apolipoprotein B mRNA editing enzyme complex)|GO:0050821(protein stabilization)	APOBEC1 complementation factor	GACAGCTATTCTTGTACAAAATAACTATTCCTGCTCTAGCCAGCCAGAATCCTGCAATCC	131825	GO:30895(apolipoprotein B mRNA editing enzyme complex); GO:5737(cytoplasm); GO:5634(nucleus)	GO:3725(double-stranded RNA binding); GO:3676(nucleic acid binding); GO:166(nucleotide binding); GO:5515(protein binding); GO:3727(single-stranded RNA binding)	Mammalian apolipoprotein B mRNA undergoes site-specific C to U deamination, which is mediated by a multi-component enzyme complex containing a minimal core composed of APOBEC-1 and a complementation factor encoded by this gene. The gene product has three non-identical RNA recognition motifs and belongs to the hnRNP R family of RNA-binding proteins. It has been proposed that this complementation f…	GO:6381(mRNA editing); GO:6397(mRNA processing); GO:50821(protein stabilization)			apobec-1 complementation factor isoform 8			16055734; 15164054; 15148397; 14702039; 12896982; 12881431; 12477932; 11871661; 11815617; 11752456; 11718896; 11577082; 11571303; 11352648; 11329013; 11134005; 11072063; 10833526; 10781591; 10669764
A_32_P110877	A2LD6	0.888018	P	104630	123267	LOC87774	NM_033110	NM_033110	NM_033110	A2LD6	chr13:101183916-101183862	GO:0003839(gamma-glutamylcyclotransferase activity)|GO:0016746(transferase activity, transferring acyl groups)|GO:0042219(cellular modified amino acid catabolic process)	Hs.350868	ENST00000455100	Homo sapiens AIG2-like domain 1 (A2LD1), transcript variant 1, mRNA [NM_033110]	hs|13q32.8	THC2610195		AIG2-like domain 6	GCTGTATATCAGAGTGCGTATAGCACCATTCTTCCTAATTTTCAGATCAAGCTTCACAGC	132466		GO:0005554(molecular function unknown)					LOC87769 protein			14702039; 12477937
A_23_P116903	A2M	0.882576	P	107376	126502	CPAMD5; FWP007; S863-7; alpha 2M; DKFZp779B091	NM_000014	NM_000014	NM_000014	A2M	chr12:009221418-009221364	GO:0001869(negative regulation of complement activation, lectin pathway)|GO:0002576(platelet degranulation)|GO:0004867(serine-type endopeptidase inhibitor activity)|GO:0005515(protein binding)|GO:0005576(extracellular region)|GO:0005615(extracellular space)|GO:0005829(cytosol)|GO:0007264(small GTPase mediated signal transduction)|GO:0007596(blood coagulation)|GO:0007597(blood coagulation, intrins…	Hs.212838	ENST00000540099	Homo sapiens alpha-2-macroglobulin (A2M), mRNA [NM_000014]	hs|12p13.31	NP1189092	GO:0001869(negative regulation of complement activation, lectin pathway)|GO:0004867(serine-type endopeptidase inhibitor activity)|GO:0005576(extracellular region)|GO:0005615(extracellular space)|GO:0006953(acute-phase response)|GO:0007584(response to nutrient)|GO:0010037(response to carbon dioxide)|GO:0019899(enzyme binding)|GO:0019959(interleukin-8 binding)|GO:0019966(interleukin-1 binding)|GO:0…	alpha-2-macroglobulin	CTTGTTCTTCACGGTTCTGCAAGATGTCCCAGTAAGAGATCTGAAACCAGCCATAGTGAA	133106	GO:5576(extracellular region)	GO:19899(enzyme binding); GO:19966(interleukin-1 binding); GO:19959(interleukin-8 binding); GO:8320(protein carrier activity); GO:4867(serine-type endopeptidase inhibitor activity); GO:43120(tumor necrosis factor binding); GO:17114(wide-spectrum protease inhibitor activity)	Alpha-2-macroglobulin is a protease inhibitor and cytokine transporter. It inhibits many proteases, including trypsin, thrombin and collagenase. A2M is implicated in Alzheimer disease (AD) due to its ability to mediate the clearance and degradation of A-beta, the major component of beta-amyloid deposits.	GO:6886(intracellular protein transport); GO:51260(protein homooligomerization)			alpha-2-macroglobulin precursor	Alzheimer disease, susceptibility to; Emphysema due to alpha-2-macroglobulin deficiency	KEGG pathway: Alzheimer's disease 05010; KEGG pathway: Complement and coagulation cascades 04610; Reactome Event:Hemostasis 109587	17071617; 16910174; 16784755; 16641085; 16407218; 16335952; 16297527; 16232083; 15931081; 15910735; 15908432; 15611997; 15511627; 15489334; 15023809; 14760718; 14718574; 14715656; 14678766; 14675603; 14637088; 14506912; 12966032; 12755687; 12755614; 12754519; 12631277; 12477932; 12221172; 12194978; 12175343; 12062545; 12042276; 12015318; 11916201; 11910179; 11901360; 11823454; 11811950; 11435418;…
A_33_P3525268	A2ML6	0.877134	A	110122	129737		NM_144670	NM_144670	NM_144670	A2ML6	chr12:009027061-009027125	GO:0004867(serine-type endopeptidase inhibitor activity)|GO:0005576(extracellular region)|GO:0005615(extracellular space)|GO:0010466(negative regulation of peptidase activity)|GO:0030414(peptidase inhibitor activity)|GO:0052548(regulation of endopeptidase activity)	Hs.620532	ENST00000541459	Homo sapiens alpha-2-macroglobulin-like 1 (A2ML1), mRNA [NM_144670]	hs|12p13.31	NP1192011	GO:0004867(serine-type endopeptidase inhibitor activity)|GO:0005515(protein binding)|GO:0005576(extracellular region)|GO:0005615(extracellular space)|GO:0052548(regulation of endopeptidase activity)	alpha-2-macroglobulin-like 6	AAAGTGTGCTGGTCACCAACTTGAAACCAGCAACCATCAAGGTCTATGACTACTACCTAC	133747
A_24_P151127	A1BG	0.871692	A	112868	132971	A1B; ABG; GAB; HYST2477; DKFZp686F0976				A1BG	chr19:058857206-058857153	GO:0003674(molecular_function)|GO:0005576(extracellular region)|GO:0008150(biological_process)	Hs.529161		Homo sapiens cDNA FLJ31639 fis, clone NT2RI2003655, weakly similar to ZINC FINGER PROTEIN 195. [AK056201]	hs|19q13.43	THC2461029		alpha-1-B glycoprotein	GCTAGTGATCTGGTTTACTGCCTTAGTAATATCTAGTTCCTAATATGCCTATGCCTTTTA	134387	GO:5576(extracellular region)	GO:3674(molecular_function)	The protein encoded by this gene is a plasma glycoprotein of unknown function. The protein shows sequence similarity to the variable regions of some immunoglobulin supergene family member proteins.	GO:8150(biological_process)			alpha 1B-glycoprotein			16335952; 15489334; 15461460; 15221005; 14760718; 14702039; 12477932; 8889549; 3610142; 3458201; 2591073
A_33_P3685222	A1BG	0.866251	P	115613	136206		NM_130786	NM_130786	NM_130786	A1BG	chr19:058858293-058858240	GO:0003674(molecular_function)|GO:0005576(extracellular region)|GO:0008150(biological_process)	Hs.529161	ENST00000263100	Homo sapiens alpha-1-B glycoprotein (A1BG), mRNA [NM_130786]	hs|19q13.43	THC2461029	GO:0003674(molecular_function)|GO:0005576(extracellular region)|GO:0008150(biological_process)	alpha-1-B glycoprotein	TCTCTGGGGGGCTGGAGAAGCCTCCCTCATTCCTCCCAGGAATTAATAAATGTGAAGAGA	135028
A_24_P721705	A1BG-AS7	0.860809	A	118359	139441	FLJ23575	NR_015380	NR_015380	NR_015380	A1BG-AS7	chr19:058866199-058866264		Hs.709582		Homo sapiens A1BG antisense RNA 1 (non-protein coding) (A1BG-AS1), non-coding RNA [NR_015380]	hs|19q13.43	NP10051223		A1BG antisense RNA 1 (non-protein coding)	AGGGTGTGCACAGAACTCAGAAGTCAGACCACTGAACAGTGACAGAACCTTTCAGCCCAT	135668					FLI_CDNA; oligo capping; fis (full insert sequence)					12477938
A_23_P104230	A1CF	0.855367	P	121105	142675	ACF; ASP; ACF64; ACF65; MGC163391; RP11-564C4.8	NM_138933	NM_138933	NM_138933	A1CF	chr10:052570857-052570806	GO:0000166(nucleotide binding)|GO:0003676(nucleic acid binding)|GO:0003723(RNA binding)|GO:0003725(double-stranded RNA binding)|GO:0003727(single-stranded RNA binding)|GO:0003729(mRNA binding)|GO:0004131(cytosine deaminase activity)|GO:0005515(protein binding)|GO:0005622(intracellular)|GO:0005634(nucleus)|GO:0005654(nucleoplasm)|GO:0005720(nuclear heterochromatin)|GO:0005737(cytoplasm)|GO:0005783…	Hs.282795	ENST00000395489	Homo sapiens APOBEC1 complementation factor (A1CF), transcript variant 3, mRNA [NM_138933]	hs|10q11.29	NP10985048	GO:0000166(nucleotide binding)|GO:0003725(double-stranded RNA binding)|GO:0003727(single-stranded RNA binding)|GO:0005515(protein binding)|GO:0005634(nucleus)|GO:0005737(cytoplasm)|GO:0005783(endoplasmic reticulum)|GO:0006397(mRNA processing)|GO:0030895(apolipoprotein B mRNA editing enzyme complex)|GO:0050821(protein stabilization)	APOBEC1 complementation factor	GACAGCTATTCTTGTACAAAATAACTATTCCTGCTCTAGCCAGCCAGAATCCTGCAATCC	136309	GO:30895(apolipoprotein B mRNA editing enzyme complex); GO:5737(cytoplasm); GO:5634(nucleus)	GO:3725(double-stranded RNA binding); GO:3676(nucleic acid binding); GO:166(nucleotide binding); GO:5515(protein binding); GO:3727(single-stranded RNA binding)	Mammalian apolipoprotein B mRNA undergoes site-specific C to U deamination, which is mediated by a multi-component enzyme complex containing a minimal core composed of APOBEC-1 and a complementation factor encoded by this gene. The gene product has three non-identical RNA recognition motifs and belongs to the hnRNP R family of RNA-binding proteins. It has been proposed that this complementation f…	GO:6381(mRNA editing); GO:6397(mRNA processing); GO:50821(protein stabilization)			apobec-1 complementation factor isoform 9			16055734; 15164054; 15148397; 14702039; 12896982; 12881431; 12477932; 11871661; 11815617; 11752456; 11718896; 11577082; 11571303; 11352648; 11329013; 11134005; 11072063; 10833526; 10781591; 10669765
A_32_P110878	A2LD7	0.849925	P	123851	145910	LOC87775	NM_033110	NM_033110	NM_033110	A2LD7	chr13:101183916-101183863	GO:0003839(gamma-glutamylcyclotransferase activity)|GO:0016746(transferase activity, transferring acyl groups)|GO:0042219(cellular modified amino acid catabolic process)	Hs.350868	ENST00000455100	Homo sapiens AIG2-like domain 1 (A2LD1), transcript variant 1, mRNA [NM_033110]	hs|13q32.9	THC2610196		AIG2-like domain 7	GCTGTATATCAGAGTGCGTATAGCACCATTCTTCCTAATTTTCAGATCAAGCTTCACAGC	136949		GO:0005554(molecular function unknown)					LOC87769 protein			14702039; 12477938
A_23_P116904	A2M	0.844483	P	126597	149144	CPAMD5; FWP007; S863-7; alpha 2M; DKFZp779B092	NM_000014	NM_000014	NM_000014	A2M	chr12:009221418-009221365	GO:0001869(negative regulation of complement activation, lectin pathway)|GO:0002576(platelet degranulation)|GO:0004867(serine-type endopeptidase inhibitor activity)|GO:0005515(protein binding)|GO:0005576(extracellular region)|GO:0005615(extracellular space)|GO:0005829(cytosol)|GO:0007264(small GTPase mediated signal transduction)|GO:0007596(blood coagulation)|GO:0007597(blood coagulation, intrins…	Hs.212838	ENST00000540099	Homo sapiens alpha-2-macroglobulin (A2M), mRNA [NM_000014]	hs|12p13.31	NP1194930	GO:0001869(negative regulation of complement activation, lectin pathway)|GO:0004867(serine-type endopeptidase inhibitor activity)|GO:0005576(extracellular region)|GO:0005615(extracellular space)|GO:0006953(acute-phase response)|GO:0007584(response to nutrient)|GO:0010037(response to carbon dioxide)|GO:0019899(enzyme binding)|GO:0019959(interleukin-8 binding)|GO:0019966(interleukin-1 binding)|GO:0…	alpha-2-macroglobulin	CTTGTTCTTCACGGTTCTGCAAGATGTCCCAGTAAGAGATCTGAAACCAGCCATAGTGAA	137590	GO:5576(extracellular region)	GO:19899(enzyme binding); GO:19966(interleukin-1 binding); GO:19959(interleukin-8 binding); GO:8320(protein carrier activity); GO:4867(serine-type endopeptidase inhibitor activity); GO:43120(tumor necrosis factor binding); GO:17114(wide-spectrum protease inhibitor activity)	Alpha-2-macroglobulin is a protease inhibitor and cytokine transporter. It inhibits many proteases, including trypsin, thrombin and collagenase. A2M is implicated in Alzheimer disease (AD) due to its ability to mediate the clearance and degradation of A-beta, the major component of beta-amyloid deposits.	GO:6886(intracellular protein transport); GO:51260(protein homooligomerization)			alpha-2-macroglobulin precursor	Alzheimer disease, susceptibility to; Emphysema due to alpha-2-macroglobulin deficiency	KEGG pathway: Alzheimer's disease 05010; KEGG pathway: Complement and coagulation cascades 04610; Reactome Event:Hemostasis 109588	17071617; 16910174; 16784755; 16641085; 16407218; 16335952; 16297527; 16232083; 15931081; 15910735; 15908432; 15611997; 15511627; 15489334; 15023809; 14760718; 14718574; 14715656; 14678766; 14675603; 14637088; 14506912; 12966032; 12755687; 12755614; 12754519; 12631277; 12477932; 12221172; 12194978; 12175343; 12062545; 12042276; 12015318; 11916201; 11910179; 11901360; 11823454; 11811950; 11435418;…
A_33_P3525269	A2ML7	0.839041	A	129343	152379		NM_144670	NM_144670	NM_144670	A2ML7	chr12:009027061-009027126	GO:0004867(serine-type endopeptidase inhibitor activity)|GO:0005576(extracellular region)|GO:0005615(extracellular space)|GO:0010466(negative regulation of peptidase activity)|GO:0030414(peptidase inhibitor activity)|GO:0052548(regulation of endopeptidase activity)	Hs.620532	ENST00000541459	Homo sapiens alpha-2-macroglobulin-like 1 (A2ML1), mRNA [NM_144670]	hs|12p13.31	NP1197849	GO:0004867(serine-type endopeptidase inhibitor activity)|GO:0005515(protein binding)|GO:0005576(extracellular region)|GO:0005615(extracellular space)|GO:0052548(regulation of endopeptidase activity)	alpha-2-macroglobulin-like 7	AAAGTGTGCTGGTCACCAACTTGAAACCAGCAACCATCAAGGTCTATGACTACTACCTAC	138230
A_24_P151128	A1BG	0.833599	A	132089	155614	A1B; ABG; GAB; HYST2477; DKFZp686F0977				A1BG	chr19:058857206-058857154	GO:0003674(molecular_function)|GO:0005576(extracellular region)|GO:0008150(biological_process)	Hs.529161		Homo sapiens cDNA FLJ31639 fis, clone NT2RI2003655, weakly similar to ZINC FINGER PROTEIN 195. [AK056201]	hs|19q13.43	THC2461029		alpha-1-B glycoprotein	GCTAGTGATCTGGTTTACTGCCTTAGTAATATCTAGTTCCTAATATGCCTATGCCTTTTA	138871	GO:5576(extracellular region)	GO:3674(molecular_function)	The protein encoded by this gene is a plasma glycoprotein of unknown function. The protein shows sequence similarity to the variable regions of some immunoglobulin supergene family member proteins.	GO:8150(biological_process)			alpha 1B-glycoprotein			16335952; 15489334; 15461460; 15221005; 14760718; 14702039; 12477932; 8889549; 3610142; 3458201; 2591074
A_33_P3685223	A1BG	0.828157	P	134835	158848		NM_130786	NM_130786	NM_130786	A1BG	chr19:058858293-058858241	GO:0003674(molecular_function)|GO:0005576(extracellular region)|GO:0008150(biological_process)	Hs.529161	ENST00000263100	Homo sapiens alpha-1-B glycoprotein (A1BG), mRNA [NM_130786]	hs|19q13.43	THC2461029	GO:0003674(molecular_function)|GO:0005576(extracellular region)|GO:0008150(biological_process)	alpha-1-B glycoprotein	TCTCTGGGGGGCTGGAGAAGCCTCCCTCATTCCTCCCAGGAATTAATAAATGTGAAGAGA	139511
A_24_P721706	A1BG-AS8	0.822716	A	137581	162083	FLJ23576	NR_015380	NR_015380	NR_015380	A1BG-AS8	chr19:058866199-058866265		Hs.709582		Homo sapiens A1BG antisense RNA 1 (non-protein coding) (A1BG-AS1), non-coding RNA [NR_015380]	hs|19q13.43	NP11918873		A1BG antisense RNA 1 (non-protein coding)	AGGGTGTGCACAGAACTCAGAAGTCAGACCACTGAACAGTGACAGAACCTTTCAGCCCAT	140152					FLI_CDNA; oligo capping; fis (full insert sequence)					12477939
A_23_P104231	A1CF	0.817274	P	140327	165318	ACF; ASP; ACF64; ACF65; MGC163391; RP11-564C4.9	NM_138933	NM_138933	NM_138933	A1CF	chr10:052570857-052570807	GO:0000166(nucleotide binding)|GO:0003676(nucleic acid binding)|GO:0003723(RNA binding)|GO:0003725(double-stranded RNA binding)|GO:0003727(single-stranded RNA binding)|GO:0003729(mRNA binding)|GO:0004131(cytosine deaminase activity)|GO:0005515(protein binding)|GO:0005622(intracellular)|GO:0005634(nucleus)|GO:0005654(nucleoplasm)|GO:0005720(nuclear heterochromatin)|GO:0005737(cytoplasm)|GO:0005783…	Hs.282795	ENST00000395489	Homo sapiens APOBEC1 complementation factor (A1CF), transcript variant 3, mRNA [NM_138933]	hs|10q11.30	NP12852698	GO:0000166(nucleotide binding)|GO:0003725(double-stranded RNA binding)|GO:0003727(single-stranded RNA binding)|GO:0005515(protein binding)|GO:0005634(nucleus)|GO:0005737(cytoplasm)|GO:0005783(endoplasmic reticulum)|GO:0006397(mRNA processing)|GO:0030895(apolipoprotein B mRNA editing enzyme complex)|GO:0050821(protein stabilization)	APOBEC1 complementation factor	GACAGCTATTCTTGTACAAAATAACTATTCCTGCTCTAGCCAGCCAGAATCCTGCAATCC	140792	GO:30895(apolipoprotein B mRNA editing enzyme complex); GO:5737(cytoplasm); GO:5634(nucleus)	GO:3725(double-stranded RNA binding); GO:3676(nucleic acid binding); GO:166(nucleotide binding); GO:5515(protein binding); GO:3727(single-stranded RNA binding)	Mammalian apolipoprotein B mRNA undergoes site-specific C to U deamination, which is mediated by a multi-component enzyme complex containing a minimal core composed of APOBEC-1 and a complementation factor encoded by this gene. The gene product has three non-identical RNA recognition motifs and belongs to the hnRNP R family of RNA-binding proteins. It has been proposed that this complementation f…	GO:6381(mRNA editing); GO:6397(mRNA processing); GO:50821(protein stabilization)			apobec-1 complementation factor isoform 10			16055734; 15164054; 15148397; 14702039; 12896982; 12881431; 12477932; 11871661; 11815617; 11752456; 11718896; 11577082; 11571303; 11352648; 11329013; 11134005; 11072063; 10833526; 10781591; 10669766
A_32_P110879	A2LD8	0.811832	P	143073	168552	LOC87776	NM_033110	NM_033110	NM_033110	A2LD8	chr13:101183916-101183864	GO:0003839(gamma-glutamylcyclotransferase activity)|GO:0016746(transferase activity, transferring acyl groups)|GO:0042219(cellular modified amino acid catabolic process)	Hs.350868	ENST00000455100	Homo sapiens AIG2-like domain 1 (A2LD1), transcript variant 1, mRNA [NM_033110]	hs|13q32.10	THC2610197		AIG2-like domain 8	GCTGTATATCAGAGTGCGTATAGCACCATTCTTCCTAATTTTCAGATCAAGCTTCACAGC	141433		GO:0005554(molecular function unknown)					LOC87769 protein			14702039; 12477939
A_23_P116905	A2M	0.80639	P	145819	171787	CPAMD5; FWP007; S863-7; alpha 2M; DKFZp779B093	NM_000014	NM_000014	NM_000014	A2M	chr12:009221418-009221366	GO:0001869(negative regulation of complement activation, lectin pathway)|GO:0002576(platelet degranulation)|GO:0004867(serine-type endopeptidase inhibitor activity)|GO:0005515(protein binding)|GO:0005576(extracellular region)|GO:0005615(extracellular space)|GO:0005829(cytosol)|GO:0007264(small GTPase mediated signal transduction)|GO:0007596(blood coagulation)|GO:0007597(blood coagulation, intrins…	Hs.212838	ENST00000540099	Homo sapiens alpha-2-macroglobulin (A2M), mRNA [NM_000014]	hs|12p13.31	NP1200768	GO:0001869(negative regulation of complement activation, lectin pathway)|GO:0004867(serine-type endopeptidase inhibitor activity)|GO:0005576(extracellular region)|GO:0005615(extracellular space)|GO:0006953(acute-phase response)|GO:0007584(response to nutrient)|GO:0010037(response to carbon dioxide)|GO:0019899(enzyme binding)|GO:0019959(interleukin-8 binding)|GO:0019966(interleukin-1 binding)|GO:0…	alpha-2-macroglobulin	CTTGTTCTTCACGGTTCTGCAAGATGTCCCAGTAAGAGATCTGAAACCAGCCATAGTGAA	142073	GO:5576(extracellular region)	GO:19899(enzyme binding); GO:19966(interleukin-1 binding); GO:19959(interleukin-8 binding); GO:8320(protein carrier activity); GO:4867(serine-type endopeptidase inhibitor activity); GO:43120(tumor necrosis factor binding); GO:17114(wide-spectrum protease inhibitor activity)	Alpha-2-macroglobulin is a protease inhibitor and cytokine transporter. It inhibits many proteases, including trypsin, thrombin and collagenase. A2M is implicated in Alzheimer disease (AD) due to its ability to mediate the clearance and degradation of A-beta, the major component of beta-amyloid deposits.	GO:6886(intracellular protein transport); GO:51260(protein homooligomerization)			alpha-2-macroglobulin precursor	Alzheimer disease, susceptibility to; Emphysema due to alpha-2-macroglobulin deficiency	KEGG pathway: Alzheimer's disease 05010; KEGG pathway: Complement and coagulation cascades 04610; Reactome Event:Hemostasis 109589	17071617; 16910174; 16784755; 16641085; 16407218; 16335952; 16297527; 16232083; 15931081; 15910735; 15908432; 15611997; 15511627; 15489334; 15023809; 14760718; 14718574; 14715656; 14678766; 14675603; 14637088; 14506912; 12966032; 12755687; 12755614; 12754519; 12631277; 12477932; 12221172; 12194978; 12175343; 12062545; 12042276; 12015318; 11916201; 11910179; 11901360; 11823454; 11811950; 11435418;…
A_33_P3525270	A2ML8	0.800948	A	148565	175022		NM_144670	NM_144670	NM_144670	A2ML8	chr12:009027061-009027127	GO:0004867(serine-type endopeptidase inhibitor activity)|GO:0005576(extracellular region)|GO:0005615(extracellular space)|GO:0010466(negative regulation of peptidase activity)|GO:0030414(peptidase inhibitor activity)|GO:0052548(regulation of endopeptidase activity)	Hs.620532	ENST00000541459	Homo sapiens alpha-2-macroglobulin-like 1 (A2ML1), mRNA [NM_144670]	hs|12p13.31	NP1203687	GO:0004867(serine-type endopeptidase inhibitor activity)|GO:0005515(protein binding)|GO:0005576(extracellular region)|GO:0005615(extracellular space)|GO:0052548(regulation of endopeptidase activity)	alpha-2-macroglobulin-like 8	AAAGTGTGCTGGTCACCAACTTGAAACCAGCAACCATCAAGGTCTATGACTACTACCTAC	142714
A_24_P151129	A1BG	0.795506	A	151311	178256	A1B; ABG; GAB; HYST2477; DKFZp686F0978				A1BG	chr19:058857206-058857155	GO:0003674(molecular_function)|GO:0005576(extracellular region)|GO:0008150(biological_process)	Hs.529161		Homo sapiens cDNA FLJ31639 fis, clone NT2RI2003655, weakly similar to ZINC FINGER PROTEIN 195. [AK056201]	hs|19q13.43	THC2461029		alpha-1-B glycoprotein	GCTAGTGATCTGGTTTACTGCCTTAGTAATATCTAGTTCCTAATATGCCTATGCCTTTTA	143354	GO:5576(extracellular region)	GO:3674(molecular_function)	The protein encoded by this gene is a plasma glycoprotein of unknown function. The protein shows sequence similarity to the variable regions of some immunoglobulin supergene family member proteins.	GO:8150(biological_process)			alpha 1B-glycoprotein			16335952; 15489334; 15461460; 15221005; 14760718; 14702039; 12477932; 8889549; 3610142; 3458201; 2591075
A_33_P3685224	A1BG	0.790064	P	154057	181491		NM_130786	NM_130786	NM_130786	A1BG	chr19:058858293-058858242	GO:0003674(molecular_function)|GO:0005576(extracellular region)|GO:0008150(biological_process)	Hs.529161	ENST00000263100	Homo sapiens alpha-1-B glycoprotein (A1BG), mRNA [NM_130786]	hs|19q13.43	THC2461029	GO:0003674(molecular_function)|GO:0005576(extracellular region)|GO:0008150(biological_process)	alpha-1-B glycoprotein	TCTCTGGGGGGCTGGAGAAGCCTCCCTCATTCCTCCCAGGAATTAATAAATGTGAAGAGA	143995
A_24_P721707	A1BG-AS9	0.784622	A	156802	184726	FLJ23577	NR_015380	NR_015380	NR_015380	A1BG-AS9	chr19:058866199-058866266		Hs.709582		Homo sapiens A1BG antisense RNA 1 (non-protein coding) (A1BG-AS1), non-coding RNA [NR_015380]	hs|19q13.43	NP13786523		A1BG antisense RNA 1 (non-protein coding)	AGGGTGTGCACAGAACTCAGAAGTCAGACCACTGAACAGTGACAGAACCTTTCAGCCCAT	144635					FLI_CDNA; oligo capping; fis (full insert sequence)					12477940
A_23_P104232	A1CF	0.779181	P	159548	187960	ACF; ASP; ACF64; ACF65; MGC163391; RP11-564C4.10	NM_138933	NM_138933	NM_138933	A1CF	chr10:052570857-052570808	GO:0000166(nucleotide binding)|GO:0003676(nucleic acid binding)|GO:0003723(RNA binding)|GO:0003725(double-stranded RNA binding)|GO:0003727(single-stranded RNA binding)|GO:0003729(mRNA binding)|GO:0004131(cytosine deaminase activity)|GO:0005515(protein binding)|GO:0005622(intracellular)|GO:0005634(nucleus)|GO:0005654(nucleoplasm)|GO:0005720(nuclear heterochromatin)|GO:0005737(cytoplasm)|GO:0005783…	Hs.282795	ENST00000395489	Homo sapiens APOBEC1 complementation factor (A1CF), transcript variant 3, mRNA [NM_138933]	hs|10q11.31	NP14720348	GO:0000166(nucleotide binding)|GO:0003725(double-stranded RNA binding)|GO:0003727(single-stranded RNA binding)|GO:0005515(protein binding)|GO:0005634(nucleus)|GO:0005737(cytoplasm)|GO:0005783(endoplasmic reticulum)|GO:0006397(mRNA processing)|GO:0030895(apolipoprotein B mRNA editing enzyme complex)|GO:0050821(protein stabilization)	APOBEC1 complementation factor	GACAGCTATTCTTGTACAAAATAACTATTCCTGCTCTAGCCAGCCAGAATCCTGCAATCC	145276	GO:30895(apolipoprotein B mRNA editing enzyme complex); GO:5737(cytoplasm); GO:5634(nucleus)	GO:3725(double-stranded RNA binding); GO:3676(nucleic acid binding); GO:166(nucleotide binding); GO:5515(protein binding); GO:3727(single-stranded RNA binding)	Mammalian apolipoprotein B mRNA undergoes site-specific C to U deamination, which is mediated by a multi-component enzyme complex containing a minimal core composed of APOBEC-1 and a complementation factor encoded by this gene. The gene product has three non-identical RNA recognition motifs and belongs to the hnRNP R family of RNA-binding proteins. It has been proposed that this complementation f…	GO:6381(mRNA editing); GO:6397(mRNA processing); GO:50821(protein stabilization)			apobec-1 complementation factor isoform 11			16055734; 15164054; 15148397; 14702039; 12896982; 12881431; 12477932; 11871661; 11815617; 11752456; 11718896; 11577082; 11571303; 11352648; 11329013; 11134005; 11072063; 10833526; 10781591; 10669767
A_32_P110880	A2LD9	0.773739	P	162294	191195	LOC87777	NM_033110	NM_033110	NM_033110	A2LD9	chr13:101183916-101183865	GO:0003839(gamma-glutamylcyclotransferase activity)|GO:0016746(transferase activity, transferring acyl groups)|GO:0042219(cellular modified amino acid catabolic process)	Hs.350868	ENST00000455100	Homo sapiens AIG2-like domain 1 (A2LD1), transcript variant 1, mRNA [NM_033110]	hs|13q32.11	THC2610198		AIG2-like domain 9	GCTGTATATCAGAGTGCGTATAGCACCATTCTTCCTAATTTTCAGATCAAGCTTCACAGC	145916		GO:0005554(molecular function unknown)					LOC87769 protein			14702039; 12477940
A_23_P116906	A2M	0.768297	P	165040	194430	CPAMD5; FWP007; S863-7; alpha 2M; DKFZp779B094	NM_000014	NM_000014	NM_000014	A2M	chr12:009221418-009221367	GO:0001869(negative regulation of complement activation, lectin pathway)|GO:0002576(platelet degranulation)|GO:0004867(serine-type endopeptidase inhibitor activity)|GO:0005515(protein binding)|GO:0005576(extracellular region)|GO:0005615(extracellular space)|GO:0005829(cytosol)|GO:0007264(small GTPase mediated signal transduction)|GO:0007596(blood coagulation)|GO:0007597(blood coagulation, intrins…	Hs.212838	ENST00000540099	Homo sapiens alpha-2-macroglobulin (A2M), mRNA [NM_000014]	hs|12p13.31	NP1206606	GO:0001869(negative regulation of complement activation, lectin pathway)|GO:0004867(serine-type endopeptidase inhibitor activity)|GO:0005576(extracellular region)|GO:0005615(extracellular space)|GO:0006953(acute-phase response)|GO:0007584(response to nutrient)|GO:0010037(response to carbon dioxide)|GO:0019899(enzyme binding)|GO:0019959(interleukin-8 binding)|GO:0019966(interleukin-1 binding)|GO:0…	alpha-2-macroglobulin	CTTGTTCTTCACGGTTCTGCAAGATGTCCCAGTAAGAGATCTGAAACCAGCCATAGTGAA	146557	GO:5576(extracellular region)	GO:19899(enzyme binding); GO:19966(interleukin-1 binding); GO:19959(interleukin-8 binding); GO:8320(protein carrier activity); GO:4867(serine-type endopeptidase inhibitor activity); GO:43120(tumor necrosis factor binding); GO:17114(wide-spectrum protease inhibitor activity)	Alpha-2-macroglobulin is a protease inhibitor and cytokine transporter. It inhibits many proteases, including trypsin, thrombin and collagenase. A2M is implicated in Alzheimer disease (AD) due to its ability to mediate the clearance and degradation of A-beta, the major component of beta-amyloid deposits.	GO:6886(intracellular protein transport); GO:51260(protein homooligomerization)			alpha-2-macroglobulin precursor	Alzheimer disease, susceptibility to; Emphysema due to alpha-2-macroglobulin deficiency	KEGG pathway: Alzheimer's disease 05010; KEGG pathway: Complement and coagulation cascades 04610; Reactome Event:Hemostasis 109590	17071617; 16910174; 16784755; 16641085; 16407218; 16335952; 16297527; 16232083; 15931081; 15910735; 15908432; 15611997; 15511627; 15489334; 15023809; 14760718; 14718574; 14715656; 14678766; 14675603; 14637088; 14506912; 12966032; 12755687; 12755614; 12754519; 12631277; 12477932; 12221172; 12194978; 12175343; 12062545; 12042276; 12015318; 11916201; 11910179; 11901360; 11823454; 11811950; 11435418;…
A_33_P3525271	A2ML9	0.762855	A	167786	197664		NM_144670	NM_144670	NM_144670	A2ML9	chr12:009027061-009027128	GO:0004867(serine-type endopeptidase inhibitor activity)|GO:0005576(extracellular region)|GO:0005615(extracellular space)|GO:0010466(negative regulation of peptidase activity)|GO:0030414(peptidase inhibitor activity)|GO:0052548(regulation of endopeptidase activity)	Hs.620532	ENST00000541459	Homo sapiens alpha-2-macroglobulin-like 1 (A2ML1), mRNA [NM_144670]	hs|12p13.31	NP1209525	GO:0004867(serine-type endopeptidase inhibitor activity)|GO:0005515(protein binding)|GO:0005576(extracellular region)|GO:0005615(extracellular space)|GO:0052548(regulation of endopeptidase activity)	alpha-2-macroglobulin-like 9	AAAGTGTGCTGGTCACCAACTTGAAACCAGCAACCATCAAGGTCTATGACTACTACCTAC	147197
A_24_P151130	A1BG	0.757413	A	170532	200899	A1B; ABG; GAB; HYST2477; DKFZp686F0979				A1BG	chr19:058857206-058857156	GO:0003674(molecular_function)|GO:0005576(extracellular region)|GO:0008150(biological_process)	Hs.529161		Homo sapiens cDNA FLJ31639 fis, clone NT2RI2003655, weakly similar to ZINC FINGER PROTEIN 195. [AK056201]	hs|19q13.43	THC2461029		alpha-1-B glycoprotein	GCTAGTGATCTGGTTTACTGCCTTAGTAATATCTAGTTCCTAATATGCCTATGCCTTTTA	147838	GO:5576(extracellular region)	GO:3674(molecular_function)	The protein encoded by this gene is a plasma glycoprotein of unknown function. The protein shows sequence similarity to the variable regions of some immunoglobulin supergene family member proteins.	GO:8150(biological_process)			alpha 1B-glycoprotein			16335952; 15489334; 15461460; 15221005; 14760718; 14702039; 12477932; 8889549; 3610142; 3458201; 2591076
A_33_P3685225	A1BG	0.751971	P	173278	204134		NM_130786	NM_130786	NM_130786	A1BG	chr19:058858293-058858243	GO:0003674(molecular_function)|GO:0005576(extracellular region)|GO:0008150(biological_process)	Hs.529161	ENST00000263100	Homo sapiens alpha-1-B glycoprotein (A1BG), mRNA [NM_130786]	hs|19q13.43	THC2461029	GO:0003674(molecular_function)|GO:0005576(extracellular region)|GO:0008150(biological_process)	alpha-1-B glycoprotein	TCTCTGGGGGGCTGGAGAAGCCTCCCTCATTCCTCCCAGGAATTAATAAATGTGAAGAGA	148478
A_24_P721708	A1BG-AS10	0.746529	A	176024	207368	FLJ23578	NR_015380	NR_015380	NR_015380	A1BG-AS10	chr19:058866199-058866267		Hs.709582		Homo sapiens A1BG antisense RNA 1 (non-protein coding) (A1BG-AS1), non-coding RNA [NR_015380]	hs|19q13.43	NP15654173		A1BG antisense RNA 1 (non-protein coding)	AGGGTGTGCACAGAACTCAGAAGTCAGACCACTGAACAGTGACAGAACCTTTCAGCCCAT	149119					FLI_CDNA; oligo capping; fis (full insert sequence)					12477941
A_23_P104233	A1CF	0.741087	P	178770	210603	ACF; ASP; ACF64; ACF65; MGC163391; RP11-564C4.11	NM_138933	NM_138933	NM_138933	A1CF	chr10:052570857-052570809	GO:0000166(nucleotide binding)|GO:0003676(nucleic acid binding)|GO:0003723(RNA binding)|GO:0003725(double-stranded RNA binding)|GO:0003727(single-stranded RNA binding)|GO:0003729(mRNA binding)|GO:0004131(cytosine deaminase activity)|GO:0005515(protein binding)|GO:0005622(intracellular)|GO:0005634(nucleus)|GO:0005654(nucleoplasm)|GO:0005720(nuclear heterochromatin)|GO:0005737(cytoplasm)|GO:0005783…	Hs.282795	ENST00000395489	Homo sapiens APOBEC1 complementation factor (A1CF), transcript variant 3, mRNA [NM_138933]	hs|10q11.32	NP16587998	GO:0000166(nucleotide binding)|GO:0003725(double-stranded RNA binding)|GO:0003727(single-stranded RNA binding)|GO:0005515(protein binding)|GO:0005634(nucleus)|GO:0005737(cytoplasm)|GO:0005783(endoplasmic reticulum)|GO:0006397(mRNA processing)|GO:0030895(apolipoprotein B mRNA editing enzyme complex)|GO:0050821(protein stabilization)	APOBEC1 complementation factor	GACAGCTATTCTTGTACAAAATAACTATTCCTGCTCTAGCCAGCCAGAATCCTGCAATCC	149759	GO:30895(apolipoprotein B mRNA editing enzyme complex); GO:5737(cytoplasm); GO:5634(nucleus)	GO:3725(double-stranded RNA binding); GO:3676(nucleic acid binding); GO:166(nucleotide binding); GO:5515(protein binding); GO:3727(single-stranded RNA binding)	Mammalian apolipoprotein B mRNA undergoes site-specific C to U deamination, which is mediated by a multi-component enzyme complex containing a minimal core composed of APOBEC-1 and a complementation factor encoded by this gene. The gene product has three non-identical RNA recognition motifs and belongs to the hnRNP R family of RNA-binding proteins. It has been proposed that this complementation f…	GO:6381(mRNA editing); GO:6397(mRNA processing); GO:50821(protein stabilization)			apobec-1 complementation factor isoform 12			16055734; 15164054; 15148397; 14702039; 12896982; 12881431; 12477932; 11871661; 11815617; 11752456; 11718896; 11577082; 11571303; 11352648; 11329013; 11134005; 11072063; 10833526; 10781591; 10669768
A_32_P110881	A2LD10	0.735646	P	181516	213838	LOC87778	NM_033110	NM_033110	NM_033110	A2LD10	chr13:101183916-101183866	GO:0003839(gamma-glutamylcyclotransferase activity)|GO:0016746(transferase activity, transferring acyl groups)|GO:0042219(cellular modified amino acid catabolic process)	Hs.350868	ENST00000455100	Homo sapiens AIG2-like domain 1 (A2LD1), transcript variant 1, mRNA [NM_033110]	hs|13q32.12	THC2610199		AIG2-like domain 10	GCTGTATATCAGAGTGCGTATAGCACCATTCTTCCTAATTTTCAGATCAAGCTTCACAGC	150400		GO:0005554(molecular function unknown)					LOC87769 protein			14702039; 12477941
A_23_P116907	A2M	0.730204	P	184262	217072	CPAMD5; FWP007; S863-7; alpha 2M; DKFZp779B095	NM_000014	NM_000014	NM_000014	A2M	chr12:009221418-009221368	GO:0001869(negative regulation of complement activation, lectin pathway)|GO:0002576(platelet degranulation)|GO:0004867(serine-type endopeptidase inhibitor activity)|GO:0005515(protein binding)|GO:0005576(extracellular region)|GO:0005615(extracellular space)|GO:0005829(cytosol)|GO:0007264(small GTPase mediated signal transduction)|GO:0007596(blood coagulation)|GO:0007597(blood coagulation, intrins…	Hs.212838	ENST00000540099	Homo sapiens alpha-2-macroglobulin (A2M), mRNA [NM_000014]	hs|12p13.31	NP1212444	GO:0001869(negative regulation of complement activation, lectin pathway)|GO:0004867(serine-type endopeptidase inhibitor activity)|GO:0005576(extracellular region)|GO:0005615(extracellular space)|GO:0006953(acute-phase response)|GO:0007584(response to nutrient)|GO:0010037(response to carbon dioxide)|GO:0019899(enzyme binding)|GO:0019959(interleukin-8 binding)|GO:0019966(interleukin-1 binding)|GO:0…	alpha-2-macroglobulin	CTTGTTCTTCACGGTTCTGCAAGATGTCCCAGTAAGAGATCTGAAACCAGCCATAGTGAA	151040	GO:5576(extracellular region)	GO:19899(enzyme binding); GO:19966(interleukin-1 binding); GO:19959(interleukin-8 binding); GO:8320(protein carrier activity); GO:4867(serine-type endopeptidase inhibitor activity); GO:43120(tumor necrosis factor binding); GO:17114(wide-spectrum protease inhibitor activity)	Alpha-2-macroglobulin is a protease inhibitor and cytokine transporter. It inhibits many proteases, including trypsin, thrombin and collagenase. A2M is implicated in Alzheimer disease (AD) due to its ability to mediate the clearance and degradation of A-beta, the major component of beta-amyloid deposits.	GO:6886(intracellular protein transport); GO:51260(protein homooligomerization)			alpha-2-macroglobulin precursor	Alzheimer disease, susceptibility to; Emphysema due to alpha-2-macroglobulin deficiency	KEGG pathway: Alzheimer's disease 05010; KEGG pathway: Complement and coagulation cascades 04610; Reactome Event:Hemostasis 109591	17071617; 16910174; 16784755; 16641085; 16407218; 16335952; 16297527; 16232083; 15931081; 15910735; 15908432; 15611997; 15511627; 15489334; 15023809; 14760718; 14718574; 14715656; 14678766; 14675603; 14637088; 14506912; 12966032; 12755687; 12755614; 12754519; 12631277; 12477932; 12221172; 12194978; 12175343; 12062545; 12042276; 12015318; 11916201; 11910179; 11901360; 11823454; 11811950; 11435418;…
A_33_P3525272	A2ML10	0.724762	A	187008	220307		NM_144670	NM_144670	NM_144670	A2ML10	chr12:009027061-009027129	GO:0004867(serine-type endopeptidase inhibitor activity)|GO:0005576(extracellular region)|GO:0005615(extracellular space)|GO:0010466(negative regulation of peptidase activity)|GO:0030414(peptidase inhibitor activity)|GO:0052548(regulation of endopeptidase activity)	Hs.620532	ENST00000541459	Homo sapiens alpha-2-macroglobulin-like 1 (A2ML1), mRNA [NM_144670]	hs|12p13.31	NP1215363	GO:0004867(serine-type endopeptidase inhibitor activity)|GO:0005515(protein binding)|GO:0005576(extracellular region)|GO:0005615(extracellular space)|GO:0052548(regulation of endopeptidase activity)	alpha-2-macroglobulin-like 10	AAAGTGTGCTGGTCACCAACTTGAAACCAGCAACCATCAAGGTCTATGACTACTACCTAC	151681
A_24_P151131	A1BG	0.71932	A	189754	223542	A1B; ABG; GAB; HYST2477; DKFZp686F0980				A1BG	chr19:058857206-058857157	GO:0003674(molecular_function)|GO:0005576(extracellular region)|GO:0008150(biological_process)	Hs.529161		Homo sapiens cDNA FLJ31639 fis, clone NT2RI2003655, weakly similar to ZINC FINGER PROTEIN 195. [AK056201]	hs|19q13.43	THC2461029		alpha-1-B glycoprotein	GCTAGTGATCTGGTTTACTGCCTTAGTAATATCTAGTTCCTAATATGCCTATGCCTTTTA	152321	GO:5576(extracellular region)	GO:3674(molecular_function)	The protein encoded by this gene is a plasma glycoprotein of unknown function. The protein shows sequence similarity to the variable regions of some immunoglobulin supergene family member proteins.	GO:8150(biological_process)			alpha 1B-glycoprotein			16335952; 15489334; 15461460; 15221005; 14760718; 14702039; 12477932; 8889549; 3610142; 3458201; 2591077
A_33_P3685226	A1BG	0.713878	P	192500	226776		NM_130786	NM_130786	NM_130786	A1BG	chr19:058858293-058858244	GO:0003674(molecular_function)|GO:0005576(extracellular region)|GO:0008150(biological_process)	Hs.529161	ENST00000263100	Homo sapiens alpha-1-B glycoprotein (A1BG), mRNA [NM_130786]	hs|19q13.43	THC2461029	GO:0003674(molecular_function)|GO:0005576(extracellular region)|GO:0008150(biological_process)	alpha-1-B glycoprotein	TCTCTGGGGGGCTGGAGAAGCCTCCCTCATTCCTCCCAGGAATTAATAAATGTGAAGAGA	152962
A_24_P721709	A1BG-AS11	0.708436	A	195246	230011	FLJ23579	NR_015380	NR_015380	NR_015380	A1BG-AS11	chr19:058866199-058866268		Hs.709582		Homo sapiens A1BG antisense RNA 1 (non-protein coding) (A1BG-AS1), non-coding RNA [NR_015380]	hs|19q13.43	NP17521823		A1BG antisense RNA 1 (non-protein coding)	AGGGTGTGCACAGAACTCAGAAGTCAGACCACTGAACAGTGACAGAACCTTTCAGCCCAT	153602					FLI_CDNA; oligo capping; fis (full insert sequence)					12477942
A_23_P104234	A1CF	0.702994	P	197992	233246	ACF; ASP; ACF64; ACF65; MGC163391; RP11-564C4.12	NM_138933	NM_138933	NM_138933	A1CF	chr10:052570857-052570810	GO:0000166(nucleotide binding)|GO:0003676(nucleic acid binding)|GO:0003723(RNA binding)|GO:0003725(double-stranded RNA binding)|GO:0003727(single-stranded RNA binding)|GO:0003729(mRNA binding)|GO:0004131(cytosine deaminase activity)|GO:0005515(protein binding)|GO:0005622(intracellular)|GO:0005634(nucleus)|GO:0005654(nucleoplasm)|GO:0005720(nuclear heterochromatin)|GO:0005737(cytoplasm)|GO:0005783…	Hs.282795	ENST00000395489	Homo sapiens APOBEC1 complementation factor (A1CF), transcript variant 3, mRNA [NM_138933]	hs|10q11.33	NP18455648	GO:0000166(nucleotide binding)|GO:0003725(double-stranded RNA binding)|GO:0003727(single-stranded RNA binding)|GO:0005515(protein binding)|GO:0005634(nucleus)|GO:0005737(cytoplasm)|GO:0005783(endoplasmic reticulum)|GO:0006397(mRNA processing)|GO:0030895(apolipoprotein B mRNA editing enzyme complex)|GO:0050821(protein stabilization)	APOBEC1 complementation factor	GACAGCTATTCTTGTACAAAATAACTATTCCTGCTCTAGCCAGCCAGAATCCTGCAATCC	154243	GO:30895(apolipoprotein B mRNA editing enzyme complex); GO:5737(cytoplasm); GO:5634(nucleus)	GO:3725(double-stranded RNA binding); GO:3676(nucleic acid binding); GO:166(nucleotide binding); GO:5515(protein binding); GO:3727(single-stranded RNA binding)	Mammalian apolipoprotein B mRNA undergoes site-specific C to U deamination, which is mediated by a multi-component enzyme complex containing a minimal core composed of APOBEC-1 and a complementation factor encoded by this gene. The gene product has three non-identical RNA recognition motifs and belongs to the hnRNP R family of RNA-binding proteins. It has been proposed that this complementation f…	GO:6381(mRNA editing); GO:6397(mRNA processing); GO:50821(protein stabilization)			apobec-1 complementation factor isoform 13			16055734; 15164054; 15148397; 14702039; 12896982; 12881431; 12477932; 11871661; 11815617; 11752456; 11718896; 11577082; 11571303; 11352648; 11329013; 11134005; 11072063; 10833526; 10781591; 10669769
A_32_P110882	A2LD11	0.697552	P	200737	236480	LOC87779	NM_033110	NM_033110	NM_033110	A2LD11	chr13:101183916-101183867	GO:0003839(gamma-glutamylcyclotransferase activity)|GO:0016746(transferase activity, transferring acyl groups)|GO:0042219(cellular modified amino acid catabolic process)	Hs.350868	ENST00000455100	Homo sapiens AIG2-like domain 1 (A2LD1), transcript variant 1, mRNA [NM_033110]	hs|13q32.13	THC2610200		AIG2-like domain 11	GCTGTATATCAGAGTGCGTATAGCACCATTCTTCCTAATTTTCAGATCAAGCTTCACAGC	154883		GO:0005554(molecular function unknown)					LOC87769 protein			14702039; 12477942
A_23_P116908	A2M	0.692111	P	203483	239715	CPAMD5; FWP007; S863-7; alpha 2M; DKFZp779B096	NM_000014	NM_000014	NM_000014	A2M	chr12:009221418-009221369	GO:0001869(negative regulation of complement activation, lectin pathway)|GO:0002576(platelet degranulation)|GO:0004867(serine-type endopeptidase inhibitor activity)|GO:0005515(protein binding)|GO:0005576(extracellular region)|GO:0005615(extracellular space)|GO:0005829(cytosol)|GO:0007264(small GTPase mediated signal transduction)|GO:0007596(blood coagulation)|GO:0007597(blood coagulation, intrins…	Hs.212838	ENST00000540099	Homo sapiens alpha-2-macroglobulin (A2M), mRNA [NM_000014]	hs|12p13.31	NP1218282	GO:0001869(negative regulation of complement activation, lectin pathway)|GO:0004867(serine-type endopeptidase inhibitor activity)|GO:0005576(extracellular region)|GO:0005615(extracellular space)|GO:0006953(acute-phase response)|GO:0007584(response to nutrient)|GO:0010037(response to carbon dioxide)|GO:0019899(enzyme binding)|GO:0019959(interleukin-8 binding)|GO:0019966(interleukin-1 binding)|GO:0…	alpha-2-macroglobulin	CTTGTTCTTCACGGTTCTGCAAGATGTCCCAGTAAGAGATCTGAAACCAGCCATAGTGAA	155524	GO:5576(extracellular region)	GO:19899(enzyme binding); GO:19966(interleukin-1 binding); GO:19959(interleukin-8 binding); GO:8320(protein carrier activity); GO:4867(serine-type endopeptidase inhibitor activity); GO:43120(tumor necrosis factor binding); GO:17114(wide-spectrum protease inhibitor activity)	Alpha-2-macroglobulin is a protease inhibitor and cytokine transporter. It inhibits many proteases, including trypsin, thrombin and collagenase. A2M is implicated in Alzheimer disease (AD) due to its ability to mediate the clearance and degradation of A-beta, the major component of beta-amyloid deposits.	GO:6886(intracellular protein transport); GO:51260(protein homooligomerization)			alpha-2-macroglobulin precursor	Alzheimer disease, susceptibility to; Emphysema due to alpha-2-macroglobulin deficiency	KEGG pathway: Alzheimer's disease 05010; KEGG pathway: Complement and coagulation cascades 04610; Reactome Event:Hemostasis 109592	17071617; 16910174; 16784755; 16641085; 16407218; 16335952; 16297527; 16232083; 15931081; 15910735; 15908432; 15611997; 15511627; 15489334; 15023809; 14760718; 14718574; 14715656; 14678766; 14675603; 14637088; 14506912; 12966032; 12755687; 12755614; 12754519; 12631277; 12477932; 12221172; 12194978; 12175343; 12062545; 12042276; 12015318; 11916201; 11910179; 11901360; 11823454; 11811950; 11435418;…
A_33_P3525273	A2ML11	0.686669	A	206229	242949		NM_144670	NM_144670	NM_144670	A2ML11	chr12:009027061-009027130	GO:0004867(serine-type endopeptidase inhibitor activity)|GO:0005576(extracellular region)|GO:0005615(extracellular space)|GO:0010466(negative regulation of peptidase activity)|GO:0030414(peptidase inhibitor activity)|GO:0052548(regulation of endopeptidase activity)	Hs.620532	ENST00000541459	Homo sapiens alpha-2-macroglobulin-like 1 (A2ML1), mRNA [NM_144670]	hs|12p13.31	NP1221201	GO:0004867(serine-type endopeptidase inhibitor activity)|GO:0005515(protein binding)|GO:0005576(extracellular region)|GO:0005615(extracellular space)|GO:0052548(regulation of endopeptidase activity)	alpha-2-macroglobulin-like 11	AAAGTGTGCTGGTCACCAACTTGAAACCAGCAACCATCAAGGTCTATGACTACTACCTAC	156164
A_24_P151132	A1BG	0.681227	A	208975	246184	A1B; ABG; GAB; HYST2477; DKFZp686F0981				A1BG	chr19:058857206-058857158	GO:0003674(molecular_function)|GO:0005576(extracellular region)|GO:0008150(biological_process)	Hs.529161		Homo sapiens cDNA FLJ31639 fis, clone NT2RI2003655, weakly similar to ZINC FINGER PROTEIN 195. [AK056201]	hs|19q13.43	THC2461029		alpha-1-B glycoprotein	GCTAGTGATCTGGTTTACTGCCTTAGTAATATCTAGTTCCTAATATGCCTATGCCTTTTA	156805	GO:5576(extracellular region)	GO:3674(molecular_function)	The protein encoded by this gene is a plasma glycoprotein of unknown function. The protein shows sequence similarity to the variable regions of some immunoglobulin supergene family member proteins.	GO:8150(biological_process)			alpha 1B-glycoprotein			16335952; 15489334; 15461460; 15221005; 14760718; 14702039; 12477932; 8889549; 3610142; 3458201; 2591078
A_33_P3685227	A1BG	0.675785	P	211721	249419		NM_130786	NM_130786	NM_130786	A1BG	chr19:058858293-058858245	GO:0003674(molecular_function)|GO:0005576(extracellular region)|GO:0008150(biological_process)	Hs.529161	ENST00000263100	Homo sapiens alpha-1-B glycoprotein (A1BG), mRNA [NM_130786]	hs|19q13.43	THC2461029	GO:0003674(molecular_function)|GO:0005576(extracellular region)|GO:0008150(biological_process)	alpha-1-B glycoprotein	TCTCTGGGGGGCTGGAGAAGCCTCCCTCATTCCTCCCAGGAATTAATAAATGTGAAGAGA	157445
A_24_P721710	A1BG-AS12	0.670343	A	214467	252653	FLJ23580	NR_015380	NR_015380	NR_015380	A1BG-AS12	chr19:058866199-058866269		Hs.709582		Homo sapiens A1BG antisense RNA 1 (non-protein coding) (A1BG-AS1), non-coding RNA [NR_015380]	hs|19q13.43	NP19389473		A1BG antisense RNA 1 (non-protein coding)	AGGGTGTGCACAGAACTCAGAAGTCAGACCACTGAACAGTGACAGAACCTTTCAGCCCAT	158086					FLI_CDNA; oligo capping; fis (full insert sequence)					12477943
A_23_P104235	A1CF	0.664901	P	217213	255888	ACF; ASP; ACF64; ACF65; MGC163391; RP11-564C4.13	NM_138933	NM_138933	NM_138933	A1CF	chr10:052570857-052570811	GO:0000166(nucleotide binding)|GO:0003676(nucleic acid binding)|GO:0003723(RNA binding)|GO:0003725(double-stranded RNA binding)|GO:0003727(single-stranded RNA binding)|GO:0003729(mRNA binding)|GO:0004131(cytosine deaminase activity)|GO:0005515(protein binding)|GO:0005622(intracellular)|GO:0005634(nucleus)|GO:0005654(nucleoplasm)|GO:0005720(nuclear heterochromatin)|GO:0005737(cytoplasm)|GO:0005783…	Hs.282795	ENST00000395489	Homo sapiens APOBEC1 complementation factor (A1CF), transcript variant 3, mRNA [NM_138933]	hs|10q11.34	NP20323298	GO:0000166(nucleotide binding)|GO:0003725(double-stranded RNA binding)|GO:0003727(single-stranded RNA binding)|GO:0005515(protein binding)|GO:0005634(nucleus)|GO:0005737(cytoplasm)|GO:0005783(endoplasmic reticulum)|GO:0006397(mRNA processing)|GO:0030895(apolipoprotein B mRNA editing enzyme complex)|GO:0050821(protein stabilization)	APOBEC1 complementation factor	GACAGCTATTCTTGTACAAAATAACTATTCCTGCTCTAGCCAGCCAGAATCCTGCAATCC	158726	GO:30895(apolipoprotein B mRNA editing enzyme complex); GO:5737(cytoplasm); GO:5634(nucleus)	GO:3725(double-stranded RNA binding); GO:3676(nucleic acid binding); GO:166(nucleotide binding); GO:5515(protein binding); GO:3727(single-stranded RNA binding)	Mammalian apolipoprotein B mRNA undergoes site-specific C to U deamination, which is mediated by a multi-component enzyme complex containing a minimal core composed of APOBEC-1 and a complementation factor encoded by this gene. The gene product has three non-identical RNA recognition motifs and belongs to the hnRNP R family of RNA-binding proteins. It has been proposed that this complementation f…	GO:6381(mRNA editing); GO:6397(mRNA processing); GO:50821(protein stabilization)			apobec-1 complementation factor isoform 14			16055734; 15164054; 15148397; 14702039; 12896982; 12881431; 12477932; 11871661; 11815617; 11752456; 11718896; 11577082; 11571303; 11352648; 11329013; 11134005; 11072063; 10833526; 10781591; 10669770
A_32_P110883	A2LD12	0.659459	P	219959	259123	LOC87780	NM_033110	NM_033110	NM_033110	A2LD12	chr13:101183916-101183868	GO:0003839(gamma-glutamylcyclotransferase activity)|GO:0016746(transferase activity, transferring acyl groups)|GO:0042219(cellular modified amino acid catabolic process)	Hs.350868	ENST00000455100	Homo sapiens AIG2-like domain 1 (A2LD1), transcript variant 1, mRNA [NM_033110]	hs|13q32.14	THC2610201		AIG2-like domain 12	GCTGTATATCAGAGTGCGTATAGCACCATTCTTCCTAATTTTCAGATCAAGCTTCACAGC	159367		GO:0005554(molecular function unknown)					LOC87769 protein			14702039; 12477943
A_23_P116909	A2M	0.654017	P	222705	262357	CPAMD5; FWP007; S863-7; alpha 2M; DKFZp779B097	NM_000014	NM_000014	NM_000014	A2M	chr12:009221418-009221370	GO:0001869(negative regulation of complement activation, lectin pathway)|GO:0002576(platelet degranulation)|GO:0004867(serine-type endopeptidase inhibitor activity)|GO:0005515(protein binding)|GO:0005576(extracellular region)|GO:0005615(extracellular space)|GO:0005829(cytosol)|GO:0007264(small GTPase mediated signal transduction)|GO:0007596(blood coagulation)|GO:0007597(blood coagulation, intrins…	Hs.212838	ENST00000540099	Homo sapiens alpha-2-macroglobulin (A2M), mRNA [NM_000014]	hs|12p13.31	NP1224120	GO:0001869(negative regulation of complement activation, lectin pathway)|GO:0004867(serine-type endopeptidase inhibitor activity)|GO:0005576(extracellular region)|GO:0005615(extracellular space)|GO:0006953(acute-phase response)|GO:0007584(response to nutrient)|GO:0010037(response to carbon dioxide)|GO:0019899(enzyme binding)|GO:0019959(interleukin-8 binding)|GO:0019966(interleukin-1 binding)|GO:0…	alpha-2-macroglobulin	CTTGTTCTTCACGGTTCTGCAAGATGTCCCAGTAAGAGATCTGAAACCAGCCATAGTGAA	160007	GO:5576(extracellular region)	GO:19899(enzyme binding); GO:19966(interleukin-1 binding); GO:19959(interleukin-8 binding); GO:8320(protein carrier activity); GO:4867(serine-type endopeptidase inhibitor activity); GO:43120(tumor necrosis factor binding); GO:17114(wide-spectrum protease inhibitor activity)	Alpha-2-macroglobulin is a protease inhibitor and cytokine transporter. It inhibits many proteases, including trypsin, thrombin and collagenase. A2M is implicated in Alzheimer disease (AD) due to its ability to mediate the clearance and degradation of A-beta, the major component of beta-amyloid deposits.	GO:6886(intracellular protein transport); GO:51260(protein homooligomerization)			alpha-2-macroglobulin precursor	Alzheimer disease, susceptibility to; Emphysema due to alpha-2-macroglobulin deficiency	KEGG pathway: Alzheimer's disease 05010; KEGG pathway: Complement and coagulation cascades 04610; Reactome Event:Hemostasis 109593	17071617; 16910174; 16784755; 16641085; 16407218; 16335952; 16297527; 16232083; 15931081; 15910735; 15908432; 15611997; 15511627; 15489334; 15023809; 14760718; 14718574; 14715656; 14678766; 14675603; 14637088; 14506912; 12966032; 12755687; 12755614; 12754519; 12631277; 12477932; 12221172; 12194978; 12175343; 12062545; 12042276; 12015318; 11916201; 11910179; 11901360; 11823454; 11811950; 11435418;…
A_33_P3525274	A2ML12	0.648576	A	225451	265592		NM_144670	NM_144670	NM_144670	A2ML12	chr12:009027061-009027131	GO:0004867(serine-type endopeptidase inhibitor activity)|GO:0005576(extracellular region)|GO:0005615(extracellular space)|GO:0010466(negative regulation of peptidase activity)|GO:0030414(peptidase inhibitor activity)|GO:0052548(regulation of endopeptidase activity)	Hs.620532	ENST00000541459	Homo sapiens alpha-2-macroglobulin-like 1 (A2ML1), mRNA [NM_144670]	hs|12p13.31	NP1227039	GO:0004867(serine-type endopeptidase inhibitor activity)|GO:0005515(protein binding)|GO:0005576(extracellular region)|GO:0005615(extracellular space)|GO:0052548(regulation of endopeptidase activity)	alpha-2-macroglobulin-like 12	AAAGTGTGCTGGTCACCAACTTGAAACCAGCAACCATCAAGGTCTATGACTACTACCTAC	160648
A_24_P151133	A1BG	0.643134	A	228197	268827	A1B; ABG; GAB; HYST2477; DKFZp686F0982				A1BG	chr19:058857206-058857159	GO:0003674(molecular_function)|GO:0005576(extracellular region)|GO:0008150(biological_process)	Hs.529161		Homo sapiens cDNA FLJ31639 fis, clone NT2RI2003655, weakly similar to ZINC FINGER PROTEIN 195. [AK056201]	hs|19q13.43	THC2461029		alpha-1-B glycoprotein	GCTAGTGATCTGGTTTACTGCCTTAGTAATATCTAGTTCCTAATATGCCTATGCCTTTTA	161288	GO:5576(extracellular region)	GO:3674(molecular_function)	The protein encoded by this gene is a plasma glycoprotein of unknown function. The protein shows sequence similarity to the variable regions of some immunoglobulin supergene family member proteins.	GO:8150(biological_process)			alpha 1B-glycoprotein			16335952; 15489334; 15461460; 15221005; 14760718; 14702039; 12477932; 8889549; 3610142; 3458201; 2591079
A_33_P3685228	A1BG	0.637692	P	230943	272061		NM_130786	NM_130786	NM_130786	A1BG	chr19:058858293-058858246	GO:0003674(molecular_function)|GO:0005576(extracellular region)|GO:0008150(biological_process)	Hs.529161	ENST00000263100	Homo sapiens alpha-1-B glycoprotein (A1BG), mRNA [NM_130786]	hs|19q13.43	THC2461029	GO:0003674(molecular_function)|GO:0005576(extracellular region)|GO:0008150(biological_process)	alpha-1-B glycoprotein	TCTCTGGGGGGCTGGAGAAGCCTCCCTCATTCCTCCCAGGAATTAATAAATGTGAAGAGA	161929
A_24_P721711	A1BG-AS13	0.63225	A	233689	275296	FLJ23581	NR_015380	NR_015380	NR_015380	A1BG-AS13	chr19:058866199-058866270		Hs.709582		Homo sapiens A1BG antisense RNA 1 (non-protein coding) (A1BG-AS1), non-coding RNA [NR_015380]	hs|19q13.43	NP21257123		A1BG antisense RNA 1 (non-protein coding)	AGGGTGTGCACAGAACTCAGAAGTCAGACCACTGAACAGTGACAGAACCTTTCAGCCCAT	162569					FLI_CDNA; oligo capping; fis (full insert sequence)					12477944
A_23_P104236	A1CF	0.626808	P	236435	278531	ACF; ASP; ACF64; ACF65; MGC163391; RP11-564C4.14	NM_138933	NM_138933	NM_138933	A1CF	chr10:052570857-052570812	GO:0000166(nucleotide binding)|GO:0003676(nucleic acid binding)|GO:0003723(RNA binding)|GO:0003725(double-stranded RNA binding)|GO:0003727(single-stranded RNA binding)|GO:0003729(mRNA binding)|GO:0004131(cytosine deaminase activity)|GO:0005515(protein binding)|GO:0005622(intracellular)|GO:0005634(nucleus)|GO:0005654(nucleoplasm)|GO:0005720(nuclear heterochromatin)|GO:0005737(cytoplasm)|GO:0005783…	Hs.282795	ENST00000395489	Homo sapiens APOBEC1 complementation factor (A1CF), transcript variant 3, mRNA [NM_138933]	hs|10q11.35	NP22190948	GO:0000166(nucleotide binding)|GO:0003725(double-stranded RNA binding)|GO:0003727(single-stranded RNA binding)|GO:0005515(protein binding)|GO:0005634(nucleus)|GO:0005737(cytoplasm)|GO:0005783(endoplasmic reticulum)|GO:0006397(mRNA processing)|GO:0030895(apolipoprotein B mRNA editing enzyme complex)|GO:0050821(protein stabilization)	APOBEC1 complementation factor	GACAGCTATTCTTGTACAAAATAACTATTCCTGCTCTAGCCAGCCAGAATCCTGCAATCC	163210	GO:30895(apolipoprotein B mRNA editing enzyme complex); GO:5737(cytoplasm); GO:5634(nucleus)	GO:3725(double-stranded RNA binding); GO:3676(nucleic acid binding); GO:166(nucleotide binding); GO:5515(protein binding); GO:3727(single-stranded RNA binding)	Mammalian apolipoprotein B mRNA undergoes site-specific C to U deamination, which is mediated by a multi-component enzyme complex containing a minimal core composed of APOBEC-1 and a complementation factor encoded by this gene. The gene product has three non-identical RNA recognition motifs and belongs to the hnRNP R family of RNA-binding proteins. It has been proposed that this complementation f…	GO:6381(mRNA editing); GO:6397(mRNA processing); GO:50821(protein stabilization)			apobec-1 complementation factor isoform 15			16055734; 15164054; 15148397; 14702039; 12896982; 12881431; 12477932; 11871661; 11815617; 11752456; 11718896; 11577082; 11571303; 11352648; 11329013; 11134005; 11072063; 10833526; 10781591; 10669771
A_32_P110884	A2LD13	0.621366	P	239181	281765	LOC87781	NM_033110	NM_033110	NM_033110	A2LD13	chr13:101183916-101183869	GO:0003839(gamma-glutamylcyclotransferase activity)|GO:0016746(transferase activity, transferring acyl groups)|GO:0042219(cellular modified amino acid catabolic process)	Hs.350868	ENST00000455100	Homo sapiens AIG2-like domain 1 (A2LD1), transcript variant 1, mRNA [NM_033110]	hs|13q32.15	THC2610202		AIG2-like domain 13	GCTGTATATCAGAGTGCGTATAGCACCATTCTTCCTAATTTTCAGATCAAGCTTCACAGC	163850		GO:0005554(molecular function unknown)					LOC87769 protein			14702039; 12477944
A_23_P116910	A2M	0.615924	P	241927	285000	CPAMD5; FWP007; S863-7; alpha 2M; DKFZp779B098	NM_000014	NM_000014	NM_000014	A2M	chr12:009221418-009221371	GO:0001869(negative regulation of complement activation, lectin pathway)|GO:0002576(platelet degranulation)|GO:0004867(serine-type endopeptidase inhibitor activity)|GO:0005515(protein binding)|GO:0005576(extracellular region)|GO:0005615(extracellular space)|GO:0005829(cytosol)|GO:0007264(small GTPase mediated signal transduction)|GO:0007596(blood coagulation)|GO:0007597(blood coagulation, intrins…	Hs.212838	ENST00000540099	Homo sapiens alpha-2-macroglobulin (A2M), mRNA [NM_000014]	hs|12p13.31	NP1229958	GO:0001869(negative regulation of complement activation, lectin pathway)|GO:0004867(serine-type endopeptidase inhibitor activity)|GO:0005576(extracellular region)|GO:0005615(extracellular space)|GO:0006953(acute-phase response)|GO:0007584(response to nutrient)|GO:0010037(response to carbon dioxide)|GO:0019899(enzyme binding)|GO:0019959(interleukin-8 binding)|GO:0019966(interleukin-1 binding)|GO:0…	alpha-2-macroglobulin	CTTGTTCTTCACGGTTCTGCAAGATGTCCCAGTAAGAGATCTGAAACCAGCCATAGTGAA	164491	GO:5576(extracellular region)	GO:19899(enzyme binding); GO:19966(interleukin-1 binding); GO:19959(interleukin-8 binding); GO:8320(protein carrier activity); GO:4867(serine-type endopeptidase inhibitor activity); GO:43120(tumor necrosis factor binding); GO:17114(wide-spectrum protease inhibitor activity)	Alpha-2-macroglobulin is a protease inhibitor and cytokine transporter. It inhibits many proteases, including trypsin, thrombin and collagenase. A2M is implicated in Alzheimer disease (AD) due to its ability to mediate the clearance and degradation of A-beta, the major component of beta-amyloid deposits.	GO:6886(intracellular protein transport); GO:51260(protein homooligomerization)			alpha-2-macroglobulin precursor	Alzheimer disease, susceptibility to; Emphysema due to alpha-2-macroglobulin deficiency	KEGG pathway: Alzheimer's disease 05010; KEGG pathway: Complement and coagulation cascades 04610; Reactome Event:Hemostasis 109594	17071617; 16910174; 16784755; 16641085; 16407218; 16335952; 16297527; 16232083; 15931081; 15910735; 15908432; 15611997; 15511627; 15489334; 15023809; 14760718; 14718574; 14715656; 14678766; 14675603; 14637088; 14506912; 12966032; 12755687; 12755614; 12754519; 12631277; 12477932; 12221172; 12194978; 12175343; 12062545; 12042276; 12015318; 11916201; 11910179; 11901360; 11823454; 11811950; 11435418;…
A_33_P3525275	A2ML13	0.610482	A	244672	288235		NM_144670	NM_144670	NM_144670	A2ML13	chr12:009027061-009027132	GO:0004867(serine-type endopeptidase inhibitor activity)|GO:0005576(extracellular region)|GO:0005615(extracellular space)|GO:0010466(negative regulation of peptidase activity)|GO:0030414(peptidase inhibitor activity)|GO:0052548(regulation of endopeptidase activity)	Hs.620532	ENST00000541459	Homo sapiens alpha-2-macroglobulin-like 1 (A2ML1), mRNA [NM_144670]	hs|12p13.31	NP1232877	GO:0004867(serine-type endopeptidase inhibitor activity)|GO:0005515(protein binding)|GO:0005576(extracellular region)|GO:0005615(extracellular space)|GO:0052548(regulation of endopeptidase activity)	alpha-2-macroglobulin-like 13	AAAGTGTGCTGGTCACCAACTTGAAACCAGCAACCATCAAGGTCTATGACTACTACCTAC	165131
A_24_P151134	A1BG	0.605041	A	247418	291469	A1B; ABG; GAB; HYST2477; DKFZp686F0983				A1BG	chr19:058857206-058857160	GO:0003674(molecular_function)|GO:0005576(extracellular region)|GO:0008150(biological_process)	Hs.529161		Homo sapiens cDNA FLJ31639 fis, clone NT2RI2003655, weakly similar to ZINC FINGER PROTEIN 195. [AK056201]	hs|19q13.43	THC2461029		alpha-1-B glycoprotein	GCTAGTGATCTGGTTTACTGCCTTAGTAATATCTAGTTCCTAATATGCCTATGCCTTTTA	165772	GO:5576(extracellular region)	GO:3674(molecular_function)	The protein encoded by this gene is a plasma glycoprotein of unknown function. The protein shows sequence similarity to the variable regions of some immunoglobulin supergene family member proteins.	GO:8150(biological_process)			alpha 1B-glycoprotein			16335952; 15489334; 15461460; 15221005; 14760718; 14702039; 12477932; 8889549; 3610142; 3458201; 2591080
A_33_P3685229	A1BG	0.599599	P	250164	294704		NM_130786	NM_130786	NM_130786	A1BG	chr19:058858293-058858247	GO:0003674(molecular_function)|GO:0005576(extracellular region)|GO:0008150(biological_process)	Hs.529161	ENST00000263100	Homo sapiens alpha-1-B glycoprotein (A1BG), mRNA [NM_130786]	hs|19q13.43	THC2461029	GO:0003674(molecular_function)|GO:0005576(extracellular region)|GO:0008150(biological_process)	alpha-1-B glycoprotein	TCTCTGGGGGGCTGGAGAAGCCTCCCTCATTCCTCCCAGGAATTAATAAATGTGAAGAGA	166412
A_24_P721712	A1BG-AS14	0.594157	A	252910	297939	FLJ23582	NR_015380	NR_015380	NR_015380	A1BG-AS14	chr19:058866199-058866271		Hs.709582		Homo sapiens A1BG antisense RNA 1 (non-protein coding) (A1BG-AS1), non-coding RNA [NR_015380]	hs|19q13.43	NP23124773		A1BG antisense RNA 1 (non-protein coding)	AGGGTGTGCACAGAACTCAGAAGTCAGACCACTGAACAGTGACAGAACCTTTCAGCCCAT	167053					FLI_CDNA; oligo capping; fis (full insert sequence)					12477945
A_23_P104237	A1CF	0.588715	P	255656	301173	ACF; ASP; ACF64; ACF65; MGC163391; RP11-564C4.15	NM_138933	NM_138933	NM_138933	A1CF	chr10:052570857-052570813	GO:0000166(nucleotide binding)|GO:0003676(nucleic acid binding)|GO:0003723(RNA binding)|GO:0003725(double-stranded RNA binding)|GO:0003727(single-stranded RNA binding)|GO:0003729(mRNA binding)|GO:0004131(cytosine deaminase activity)|GO:0005515(protein binding)|GO:0005622(intracellular)|GO:0005634(nucleus)|GO:0005654(nucleoplasm)|GO:0005720(nuclear heterochromatin)|GO:0005737(cytoplasm)|GO:0005783…	Hs.282795	ENST00000395489	Homo sapiens APOBEC1 complementation factor (A1CF), transcript variant 3, mRNA [NM_138933]	hs|10q11.36	NP24058598	GO:0000166(nucleotide binding)|GO:0003725(double-stranded RNA binding)|GO:0003727(single-stranded RNA binding)|GO:0005515(protein binding)|GO:0005634(nucleus)|GO:0005737(cytoplasm)|GO:0005783(endoplasmic reticulum)|GO:0006397(mRNA processing)|GO:0030895(apolipoprotein B mRNA editing enzyme complex)|GO:0050821(protein stabilization)	APOBEC1 complementation factor	GACAGCTATTCTTGTACAAAATAACTATTCCTGCTCTAGCCAGCCAGAATCCTGCAATCC	167693	GO:30895(apolipoprotein B mRNA editing enzyme complex); GO:5737(cytoplasm); GO:5634(nucleus)	GO:3725(double-stranded RNA binding); GO:3676(nucleic acid binding); GO:166(nucleotide binding); GO:5515(protein binding); GO:3727(single-stranded RNA binding)	Mammalian apolipoprotein B mRNA undergoes site-specific C to U deamination, which is mediated by a multi-component enzyme complex containing a minimal core composed of APOBEC-1 and a complementation factor encoded by this gene. The gene product has three non-identical RNA recognition motifs and belongs to the hnRNP R family of RNA-binding proteins. It has been proposed that this complementation f…	GO:6381(mRNA editing); GO:6397(mRNA processing); GO:50821(protein stabilization)			apobec-1 complementation factor isoform 16			16055734; 15164054; 15148397; 14702039; 12896982; 12881431; 12477932; 11871661; 11815617; 11752456; 11718896; 11577082; 11571303; 11352648; 11329013; 11134005; 11072063; 10833526; 10781591; 10669772
A_32_P110885	A2LD14	0.583273	P	258402	304408	LOC87782	NM_033110	NM_033110	NM_033110	A2LD14	chr13:101183916-101183870	GO:0003839(gamma-glutamylcyclotransferase activity)|GO:0016746(transferase activity, transferring acyl groups)|GO:0042219(cellular modified amino acid catabolic process)	Hs.350868	ENST00000455100	Homo sapiens AIG2-like domain 1 (A2LD1), transcript variant 1, mRNA [NM_033110]	hs|13q32.16	THC2610203		AIG2-like domain 14	GCTGTATATCAGAGTGCGTATAGCACCATTCTTCCTAATTTTCAGATCAAGCTTCACAGC	168334		GO:0005554(molecular function unknown)					LOC87769 protein			14702039; 12477945
A_23_P116911	A2M	0.577831	P	261148	307643	CPAMD5; FWP007; S863-7; alpha 2M; DKFZp779B099	NM_000014	NM_000014	NM_000014	A2M	chr12:009221418-009221372	GO:0001869(negative regulation of complement activation, lectin pathway)|GO:0002576(platelet degranulation)|GO:0004867(serine-type endopeptidase inhibitor activity)|GO:0005515(protein binding)|GO:0005576(extracellular region)|GO:0005615(extracellular space)|GO:0005829(cytosol)|GO:0007264(small GTPase mediated signal transduction)|GO:0007596(blood coagulation)|GO:0007597(blood coagulation, intrins…	Hs.212838	ENST00000540099	Homo sapiens alpha-2-macroglobulin (A2M), mRNA [NM_000014]	hs|12p13.31	NP1235796	GO:0001869(negative regulation of complement activation, lectin pathway)|GO:0004867(serine-type endopeptidase inhibitor activity)|GO:0005576(extracellular region)|GO:0005615(extracellular space)|GO:0006953(acute-phase response)|GO:0007584(response to nutrient)|GO:0010037(response to carbon dioxide)|GO:0019899(enzyme binding)|GO:0019959(interleukin-8 binding)|GO:0019966(interleukin-1 binding)|GO:0…	alpha-2-macroglobulin	CTTGTTCTTCACGGTTCTGCAAGATGTCCCAGTAAGAGATCTGAAACCAGCCATAGTGAA	168974	GO:5576(extracellular region)	GO:19899(enzyme binding); GO:19966(interleukin-1 binding); GO:19959(interleukin-8 binding); GO:8320(protein carrier activity); GO:4867(serine-type endopeptidase inhibitor activity); GO:43120(tumor necrosis factor binding); GO:17114(wide-spectrum protease inhibitor activity)	Alpha-2-macroglobulin is a protease inhibitor and cytokine transporter. It inhibits many proteases, including trypsin, thrombin and collagenase. A2M is implicated in Alzheimer disease (AD) due to its ability to mediate the clearance and degradation of A-beta, the major component of beta-amyloid deposits.	GO:6886(intracellular protein transport); GO:51260(protein homooligomerization)			alpha-2-macroglobulin precursor	Alzheimer disease, susceptibility to; Emphysema due to alpha-2-macroglobulin deficiency	KEGG pathway: Alzheimer's disease 05010; KEGG pathway: Complement and coagulation cascades 04610; Reactome Event:Hemostasis 109595	17071617; 16910174; 16784755; 16641085; 16407218; 16335952; 16297527; 16232083; 15931081; 15910735; 15908432; 15611997; 15511627; 15489334; 15023809; 14760718; 14718574; 14715656; 14678766; 14675603; 14637088; 14506912; 12966032; 12755687; 12755614; 12754519; 12631277; 12477932; 12221172; 12194978; 12175343; 12062545; 12042276; 12015318; 11916201; 11910179; 11901360; 11823454; 11811950; 11435418;…
A_33_P3525276	A2ML14	0.572389	A	263894	310877		NM_144670	NM_144670	NM_144670	A2ML14	chr12:009027061-009027133	GO:0004867(serine-type endopeptidase inhibitor activity)|GO:0005576(extracellular region)|GO:0005615(extracellular space)|GO:0010466(negative regulation of peptidase activity)|GO:0030414(peptidase inhibitor activity)|GO:0052548(regulation of endopeptidase activity)	Hs.620532	ENST00000541459	Homo sapiens alpha-2-macroglobulin-like 1 (A2ML1), mRNA [NM_144670]	hs|12p13.31	NP1238715	GO:0004867(serine-type endopeptidase inhibitor activity)|GO:0005515(protein binding)|GO:0005576(extracellular region)|GO:0005615(extracellular space)|GO:0052548(regulation of endopeptidase activity)	alpha-2-macroglobulin-like 14	AAAGTGTGCTGGTCACCAACTTGAAACCAGCAACCATCAAGGTCTATGACTACTACCTAC	169615
A_24_P151135	A1BG	0.566947	A	266640	314112	A1B; ABG; GAB; HYST2477; DKFZp686F0984				A1BG	chr19:058857206-058857161	GO:0003674(molecular_function)|GO:0005576(extracellular region)|GO:0008150(biological_process)	Hs.529161		Homo sapiens cDNA FLJ31639 fis, clone NT2RI2003655, weakly similar to ZINC FINGER PROTEIN 195. [AK056201]	hs|19q13.43	THC2461029		alpha-1-B glycoprotein	GCTAGTGATCTGGTTTACTGCCTTAGTAATATCTAGTTCCTAATATGCCTATGCCTTTTA	170255	GO:5576(extracellular region)	GO:3674(molecular_function)	The protein encoded by this gene is a plasma glycoprotein of unknown function. The protein shows sequence similarity to the variable regions of some immunoglobulin supergene family member proteins.	GO:8150(biological_process)			alpha 1B-glycoprotein			16335952; 15489334; 15461460; 15221005; 14760718; 14702039; 12477932; 8889549; 3610142; 3458201; 2591081
A_33_P3685230	A1BG	0.561506	P	269386	317347		NM_130786	NM_130786	NM_130786	A1BG	chr19:058858293-058858248	GO:0003674(molecular_function)|GO:0005576(extracellular region)|GO:0008150(biological_process)	Hs.529161	ENST00000263100	Homo sapiens alpha-1-B glycoprotein (A1BG), mRNA [NM_130786]	hs|19q13.43	THC2461029	GO:0003674(molecular_function)|GO:0005576(extracellular region)|GO:0008150(biological_process)	alpha-1-B glycoprotein	TCTCTGGGGGGCTGGAGAAGCCTCCCTCATTCCTCCCAGGAATTAATAAATGTGAAGAGA	170896
A_24_P721713	A1BG-AS15	0.556064	A	272132	320581	FLJ23583	NR_015380	NR_015380	NR_015380	A1BG-AS15	chr19:058866199-058866272		Hs.709582		Homo sapiens A1BG antisense RNA 1 (non-protein coding) (A1BG-AS1), non-coding RNA [NR_015380]	hs|19q13.43	NP24992423		A1BG antisense RNA 1 (non-protein coding)	AGGGTGTGCACAGAACTCAGAAGTCAGACCACTGAACAGTGACAGAACCTTTCAGCCCAT	171536					FLI_CDNA; oligo capping; fis (full insert sequence)					12477946
A_23_P104238	A1CF	0.550622	P	274878	323816	ACF; ASP; ACF64; ACF65; MGC163391; RP11-564C4.16	NM_138933	NM_138933	NM_138933	A1CF	chr10:052570857-052570814	GO:0000166(nucleotide binding)|GO:0003676(nucleic acid binding)|GO:0003723(RNA binding)|GO:0003725(double-stranded RNA binding)|GO:0003727(single-stranded RNA binding)|GO:0003729(mRNA binding)|GO:0004131(cytosine deaminase activity)|GO:0005515(protein binding)|GO:0005622(intracellular)|GO:0005634(nucleus)|GO:0005654(nucleoplasm)|GO:0005720(nuclear heterochromatin)|GO:0005737(cytoplasm)|GO:0005783…	Hs.282795	ENST00000395489	Homo sapiens APOBEC1 complementation factor (A1CF), transcript variant 3, mRNA [NM_138933]	hs|10q11.37	NP25926248	GO:0000166(nucleotide binding)|GO:0003725(double-stranded RNA binding)|GO:0003727(single-stranded RNA binding)|GO:0005515(protein binding)|GO:0005634(nucleus)|GO:0005737(cytoplasm)|GO:0005783(endoplasmic reticulum)|GO:0006397(mRNA processing)|GO:0030895(apolipoprotein B mRNA editing enzyme complex)|GO:0050821(protein stabilization)	APOBEC1 complementation factor	GACAGCTATTCTTGTACAAAATAACTATTCCTGCTCTAGCCAGCCAGAATCCTGCAATCC	172177	GO:30895(apolipoprotein B mRNA editing enzyme complex); GO:5737(cytoplasm); GO:5634(nucleus)	GO:3725(double-stranded RNA binding); GO:3676(nucleic acid binding); GO:166(nucleotide binding); GO:5515(protein binding); GO:3727(single-stranded RNA binding)	Mammalian apolipoprotein B mRNA undergoes site-specific C to U deamination, which is mediated by a multi-component enzyme complex containing a minimal core composed of APOBEC-1 and a complementation factor encoded by this gene. The gene product has three non-identical RNA recognition motifs and belongs to the hnRNP R family of RNA-binding proteins. It has been proposed that this complementation f…	GO:6381(mRNA editing); GO:6397(mRNA processing); GO:50821(protein stabilization)			apobec-1 complementation factor isoform 17			16055734; 15164054; 15148397; 14702039; 12896982; 12881431; 12477932; 11871661; 11815617; 11752456; 11718896; 11577082; 11571303; 11352648; 11329013; 11134005; 11072063; 10833526; 10781591; 10669773
A_32_P110886	A2LD15	0.54518	P	277624	327051	LOC87783	NM_033110	NM_033110	NM_033110	A2LD15	chr13:101183916-101183871	GO:0003839(gamma-glutamylcyclotransferase activity)|GO:0016746(transferase activity, transferring acyl groups)|GO:0042219(cellular modified amino acid catabolic process)	Hs.350868	ENST00000455100	Homo sapiens AIG2-like domain 1 (A2LD1), transcript variant 1, mRNA [NM_033110]	hs|13q32.17	THC2610204		AIG2-like domain 15	GCTGTATATCAGAGTGCGTATAGCACCATTCTTCCTAATTTTCAGATCAAGCTTCACAGC	172817		GO:0005554(molecular function unknown)					LOC87769 protein			14702039; 12477946
A_23_P116912	A2M	0.539738	P	280370	330285	CPAMD5; FWP007; S863-7; alpha 2M; DKFZp779B100	NM_000014	NM_000014	NM_000014	A2M	chr12:009221418-009221373	GO:0001869(negative regulation of complement activation, lectin pathway)|GO:0002576(platelet degranulation)|GO:0004867(serine-type endopeptidase inhibitor activity)|GO:0005515(protein binding)|GO:0005576(extracellular region)|GO:0005615(extracellular space)|GO:0005829(cytosol)|GO:0007264(small GTPase mediated signal transduction)|GO:0007596(blood coagulation)|GO:0007597(blood coagulation, intrins…	Hs.212838	ENST00000540099	Homo sapiens alpha-2-macroglobulin (A2M), mRNA [NM_000014]	hs|12p13.31	NP1241634	GO:0001869(negative regulation of complement activation, lectin pathway)|GO:0004867(serine-type endopeptidase inhibitor activity)|GO:0005576(extracellular region)|GO:0005615(extracellular space)|GO:0006953(acute-phase response)|GO:0007584(response to nutrient)|GO:0010037(response to carbon dioxide)|GO:0019899(enzyme binding)|GO:0019959(interleukin-8 binding)|GO:0019966(interleukin-1 binding)|GO:0…	alpha-2-macroglobulin	CTTGTTCTTCACGGTTCTGCAAGATGTCCCAGTAAGAGATCTGAAACCAGCCATAGTGAA	173458	GO:5576(extracellular region)	GO:19899(enzyme binding); GO:19966(interleukin-1 binding); GO:19959(interleukin-8 binding); GO:8320(protein carrier activity); GO:4867(serine-type endopeptidase inhibitor activity); GO:43120(tumor necrosis factor binding); GO:17114(wide-spectrum protease inhibitor activity)	Alpha-2-macroglobulin is a protease inhibitor and cytokine transporter. It inhibits many proteases, including trypsin, thrombin and collagenase. A2M is implicated in Alzheimer disease (AD) due to its ability to mediate the clearance and degradation of A-beta, the major component of beta-amyloid deposits.	GO:6886(intracellular protein transport); GO:51260(protein homooligomerization)			alpha-2-macroglobulin precursor	Alzheimer disease, susceptibility to; Emphysema due to alpha-2-macroglobulin deficiency	KEGG pathway: Alzheimer's disease 05010; KEGG pathway: Complement and coagulation cascades 04610; Reactome Event:Hemostasis 109596	17071617; 16910174; 16784755; 16641085; 16407218; 16335952; 16297527; 16232083; 15931081; 15910735; 15908432; 15611997; 15511627; 15489334; 15023809; 14760718; 14718574; 14715656; 14678766; 14675603; 14637088; 14506912; 12966032; 12755687; 12755614; 12754519; 12631277; 12477932; 12221172; 12194978; 12175343; 12062545; 12042276; 12015318; 11916201; 11910179; 11901360; 11823454; 11811950; 11435418;…
A_33_P3525277	A2ML15	0.534296	A	283116	333520		NM_144670	NM_144670	NM_144670	A2ML15	chr12:009027061-009027134	GO:0004867(serine-type endopeptidase inhibitor activity)|GO:0005576(extracellular region)|GO:0005615(extracellular space)|GO:0010466(negative regulation of peptidase activity)|GO:0030414(peptidase inhibitor activity)|GO:0052548(regulation of endopeptidase activity)	Hs.620532	ENST00000541459	Homo sapiens alpha-2-macroglobulin-like 1 (A2ML1), mRNA [NM_144670]	hs|12p13.31	NP1244553	GO:0004867(serine-type endopeptidase inhibitor activity)|GO:0005515(protein binding)|GO:0005576(extracellular region)|GO:0005615(extracellular space)|GO:0052548(regulation of endopeptidase activity)	alpha-2-macroglobulin-like 15	AAAGTGTGCTGGTCACCAACTTGAAACCAGCAACCATCAAGGTCTATGACTACTACCTAC	174098
A_24_P151136	A1BG	0.528854	A	285862	336755	A1B; ABG; GAB; HYST2477; DKFZp686F0985				A1BG	chr19:058857206-058857162	GO:0003674(molecular_function)|GO:0005576(extracellular region)|GO:0008150(biological_process)	Hs.529161		Homo sapiens cDNA FLJ31639 fis, clone NT2RI2003655, weakly similar to ZINC FINGER PROTEIN 195. [AK056201]	hs|19q13.43	THC2461029		alpha-1-B glycoprotein	GCTAGTGATCTGGTTTACTGCCTTAGTAATATCTAGTTCCTAATATGCCTATGCCTTTTA	174739	GO:5576(extracellular region)	GO:3674(molecular_function)	The protein encoded by this gene is a plasma glycoprotein of unknown function. The protein shows sequence similarity to the variable regions of some immunoglobulin supergene family member proteins.	GO:8150(biological_process)			alpha 1B-glycoprotein			16335952; 15489334; 15461460; 15221005; 14760718; 14702039; 12477932; 8889549; 3610142; 3458201; 2591082
A_33_P3685231	A1BG	0.523412	P	288607	339989		NM_130786	NM_130786	NM_130786	A1BG	chr19:058858293-058858249	GO:0003674(molecular_function)|GO:0005576(extracellular region)|GO:0008150(biological_process)	Hs.529161	ENST00000263100	Homo sapiens alpha-1-B glycoprotein (A1BG), mRNA [NM_130786]	hs|19q13.43	THC2461029	GO:0003674(molecular_function)|GO:0005576(extracellular region)|GO:0008150(biological_process)	alpha-1-B glycoprotein	TCTCTGGGGGGCTGGAGAAGCCTCCCTCATTCCTCCCAGGAATTAATAAATGTGAAGAGA	175379
A_24_P721714	A1BG-AS16	0.517971	A	291353	343224	FLJ23584	NR_015380	NR_015380	NR_015380	A1BG-AS16	chr19:058866199-058866273		Hs.709582		Homo sapiens A1BG antisense RNA 1 (non-protein coding) (A1BG-AS1), non-coding RNA [NR_015380]	hs|19q13.43	NP26860073		A1BG antisense RNA 1 (non-protein coding)	AGGGTGTGCACAGAACTCAGAAGTCAGACCACTGAACAGTGACAGAACCTTTCAGCCCAT	176020					FLI_CDNA; oligo capping; fis (full insert sequence)					12477947
A_23_P104239	A1CF	0.512529	P	294099	346458	ACF; ASP; ACF64; ACF65; MGC163391; RP11-564C4.17	NM_138933	NM_138933	NM_138933	A1CF	chr10:052570857-052570815	GO:0000166(nucleotide binding)|GO:0003676(nucleic acid binding)|GO:0003723(RNA binding)|GO:0003725(double-stranded RNA binding)|GO:0003727(single-stranded RNA binding)|GO:0003729(mRNA binding)|GO:0004131(cytosine deaminase activity)|GO:0005515(protein binding)|GO:0005622(intracellular)|GO:0005634(nucleus)|GO:0005654(nucleoplasm)|GO:0005720(nuclear heterochromatin)|GO:0005737(cytoplasm)|GO:0005783…	Hs.282795	ENST00000395489	Homo sapiens APOBEC1 complementation factor (A1CF), transcript variant 3, mRNA [NM_138933]	hs|10q11.38	NP27793898	GO:0000166(nucleotide binding)|GO:0003725(double-stranded RNA binding)|GO:0003727(single-stranded RNA binding)|GO:0005515(protein binding)|GO:0005634(nucleus)|GO:0005737(cytoplasm)|GO:0005783(endoplasmic reticulum)|GO:0006397(mRNA processing)|GO:0030895(apolipoprotein B mRNA editing enzyme complex)|GO:0050821(protein stabilization)	APOBEC1 complementation factor	GACAGCTATTCTTGTACAAAATAACTATTCCTGCTCTAGCCAGCCAGAATCCTGCAATCC	176660	GO:30895(apolipoprotein B mRNA editing enzyme complex); GO:5737(cytoplasm); GO:5634(nucleus)	GO:3725(double-stranded RNA binding); GO:3676(nucleic acid binding); GO:166(nucleotide binding); GO:5515(protein binding); GO:3727(single-stranded RNA binding)	Mammalian apolipoprotein B mRNA undergoes site-specific C to U deamination, which is mediated by a multi-component enzyme complex containing a minimal core composed of APOBEC-1 and a complementation factor encoded by this gene. The gene product has three non-identical RNA recognition motifs and belongs to the hnRNP R family of RNA-binding proteins. It has been proposed that this complementation f…	GO:6381(mRNA editing); GO:6397(mRNA processing); GO:50821(protein stabilization)			apobec-1 complementation factor isoform 18			16055734; 15164054; 15148397; 14702039; 12896982; 12881431; 12477932; 11871661; 11815617; 11752456; 11718896; 11577082; 11571303; 11352648; 11329013; 11134005; 11072063; 10833526; 10781591; 10669774
A_32_P110887	A2LD16	0.507087	P	296845	349693	LOC87784	NM_033110	NM_033110	NM_033110	A2LD16	chr13:101183916-101183872	GO:0003839(gamma-glutamylcyclotransferase activity)|GO:0016746(transferase activity, transferring acyl groups)|GO:0042219(cellular modified amino acid catabolic process)	Hs.350868	ENST00000455100	Homo sapiens AIG2-like domain 1 (A2LD1), transcript variant 1, mRNA [NM_033110]	hs|13q32.18	THC2610205		AIG2-like domain 16	GCTGTATATCAGAGTGCGTATAGCACCATTCTTCCTAATTTTCAGATCAAGCTTCACAGC	177301		GO:0005554(molecular function unknown)					LOC87769 protein			14702039; 12477947
A_23_P116913	A2M	0.501645	P	299591	352928	CPAMD5; FWP007; S863-7; alpha 2M; DKFZp779B101	NM_000014	NM_000014	NM_000014	A2M	chr12:009221418-009221374	GO:0001869(negative regulation of complement activation, lectin pathway)|GO:0002576(platelet degranulation)|GO:0004867(serine-type endopeptidase inhibitor activity)|GO:0005515(protein binding)|GO:0005576(extracellular region)|GO:0005615(extracellular space)|GO:0005829(cytosol)|GO:0007264(small GTPase mediated signal transduction)|GO:0007596(blood coagulation)|GO:0007597(blood coagulation, intrins…	Hs.212838	ENST00000540099	Homo sapiens alpha-2-macroglobulin (A2M), mRNA [NM_000014]	hs|12p13.31	NP1247472	GO:0001869(negative regulation of complement activation, lectin pathway)|GO:0004867(serine-type endopeptidase inhibitor activity)|GO:0005576(extracellular region)|GO:0005615(extracellular space)|GO:0006953(acute-phase response)|GO:0007584(response to nutrient)|GO:0010037(response to carbon dioxide)|GO:0019899(enzyme binding)|GO:0019959(interleukin-8 binding)|GO:0019966(interleukin-1 binding)|GO:0…	alpha-2-macroglobulin	CTTGTTCTTCACGGTTCTGCAAGATGTCCCAGTAAGAGATCTGAAACCAGCCATAGTGAA	177941	GO:5576(extracellular region)	GO:19899(enzyme binding); GO:19966(interleukin-1 binding); GO:19959(interleukin-8 binding); GO:8320(protein carrier activity); GO:4867(serine-type endopeptidase inhibitor activity); GO:43120(tumor necrosis factor binding); GO:17114(wide-spectrum protease inhibitor activity)	Alpha-2-macroglobulin is a protease inhibitor and cytokine transporter. It inhibits many proteases, including trypsin, thrombin and collagenase. A2M is implicated in Alzheimer disease (AD) due to its ability to mediate the clearance and degradation of A-beta, the major component of beta-amyloid deposits.	GO:6886(intracellular protein transport); GO:51260(protein homooligomerization)			alpha-2-macroglobulin precursor	Alzheimer disease, susceptibility to; Emphysema due to alpha-2-macroglobulin deficiency	KEGG pathway: Alzheimer's disease 05010; KEGG pathway: Complement and coagulation cascades 04610; Reactome Event:Hemostasis 109597	17071617; 16910174; 16784755; 16641085; 16407218; 16335952; 16297527; 16232083; 15931081; 15910735; 15908432; 15611997; 15511627; 15489334; 15023809; 14760718; 14718574; 14715656; 14678766; 14675603; 14637088; 14506912; 12966032; 12755687; 12755614; 12754519; 12631277; 12477932; 12221172; 12194978; 12175343; 12062545; 12042276; 12015318; 11916201; 11910179; 11901360; 11823454; 11811950; 11435418;…
A_33_P3525278	A2ML16	0.496203	A	302337	356162		NM_144670	NM_144670	NM_144670	A2ML16	chr12:009027061-009027135	GO:0004867(serine-type endopeptidase inhibitor activity)|GO:0005576(extracellular region)|GO:0005615(extracellular space)|GO:0010466(negative regulation of peptidase activity)|GO:0030414(peptidase inhibitor activity)|GO:0052548(regulation of endopeptidase activity)	Hs.620532	ENST00000541459	Homo sapiens alpha-2-macroglobulin-like 1 (A2ML1), mRNA [NM_144670]	hs|12p13.31	NP1250391	GO:0004867(serine-type endopeptidase inhibitor activity)|GO:0005515(protein binding)|GO:0005576(extracellular region)|GO:0005615(extracellular space)|GO:0052548(regulation of endopeptidase activity)	alpha-2-macroglobulin-like 16	AAAGTGTGCTGGTCACCAACTTGAAACCAGCAACCATCAAGGTCTATGACTACTACCTAC	178582
A_24_P151137	A1BG	0.490761	A	305083	359397	A1B; ABG; GAB; HYST2477; DKFZp686F0986				A1BG	chr19:058857206-058857163	GO:0003674(molecular_function)|GO:0005576(extracellular region)|GO:0008150(biological_process)	Hs.529161		Homo sapiens cDNA FLJ31639 fis, clone NT2RI2003655, weakly similar to ZINC FINGER PROTEIN 195. [AK056201]	hs|19q13.43	THC2461029		alpha-1-B glycoprotein	GCTAGTGATCTGGTTTACTGCCTTAGTAATATCTAGTTCCTAATATGCCTATGCCTTTTA	179222	GO:5576(extracellular region)	GO:3674(molecular_function)	The protein encoded by this gene is a plasma glycoprotein of unknown function. The protein shows sequence similarity to the variable regions of some immunoglobulin supergene family member proteins.	GO:8150(biological_process)			alpha 1B-glycoprotein			16335952; 15489334; 15461460; 15221005; 14760718; 14702039; 12477932; 8889549; 3610142; 3458201; 2591083
A_33_P3685232	A1BG	0.485319	P	307829	362632		NM_130786	NM_130786	NM_130786	A1BG	chr19:058858293-058858250	GO:0003674(molecular_function)|GO:0005576(extracellular region)|GO:0008150(biological_process)	Hs.529161	ENST00000263100	Homo sapiens alpha-1-B glycoprotein (A1BG), mRNA [NM_130786]	hs|19q13.43	THC2461029	GO:0003674(molecular_function)|GO:0005576(extracellular region)|GO:0008150(biological_process)	alpha-1-B glycoprotein	TCTCTGGGGGGCTGGAGAAGCCTCCCTCATTCCTCCCAGGAATTAATAAATGTGAAGAGA	179863
A_24_P721715	A1BG-AS17	0.479877	A	310575	365866	FLJ23585	NR_015380	NR_015380	NR_015380	A1BG-AS17	chr19:058866199-058866274		Hs.709582		Homo sapiens A1BG antisense RNA 1 (non-protein coding) (A1BG-AS1), non-coding RNA [NR_015380]	hs|19q13.43	NP28727723		A1BG antisense RNA 1 (non-protein coding)	AGGGTGTGCACAGAACTCAGAAGTCAGACCACTGAACAGTGACAGAACCTTTCAGCCCAT	180503					FLI_CDNA; oligo capping; fis (full insert sequence)					12477948
A_23_P104240	A1CF	0.474436	P	313321	369101	ACF; ASP; ACF64; ACF65; MGC163391; RP11-564C4.18	NM_138933	NM_138933	NM_138933	A1CF	chr10:052570857-052570816	GO:0000166(nucleotide binding)|GO:0003676(nucleic acid binding)|GO:0003723(RNA binding)|GO:0003725(double-stranded RNA binding)|GO:0003727(single-stranded RNA binding)|GO:0003729(mRNA binding)|GO:0004131(cytosine deaminase activity)|GO:0005515(protein binding)|GO:0005622(intracellular)|GO:0005634(nucleus)|GO:0005654(nucleoplasm)|GO:0005720(nuclear heterochromatin)|GO:0005737(cytoplasm)|GO:0005783…	Hs.282795	ENST00000395489	Homo sapiens APOBEC1 complementation factor (A1CF), transcript variant 3, mRNA [NM_138933]	hs|10q11.39	NP29661548	GO:0000166(nucleotide binding)|GO:0003725(double-stranded RNA binding)|GO:0003727(single-stranded RNA binding)|GO:0005515(protein binding)|GO:0005634(nucleus)|GO:0005737(cytoplasm)|GO:0005783(endoplasmic reticulum)|GO:0006397(mRNA processing)|GO:0030895(apolipoprotein B mRNA editing enzyme complex)|GO:0050821(protein stabilization)	APOBEC1 complementation factor	GACAGCTATTCTTGTACAAAATAACTATTCCTGCTCTAGCCAGCCAGAATCCTGCAATCC	181144	GO:30895(apolipoprotein B mRNA editing enzyme complex); GO:5737(cytoplasm); GO:5634(nucleus)	GO:3725(double-stranded RNA binding); GO:3676(nucleic acid binding); GO:166(nucleotide binding); GO:5515(protein binding); GO:3727(single-stranded RNA binding)	Mammalian apolipoprotein B mRNA undergoes site-specific C to U deamination, which is mediated by a multi-component enzyme complex containing a minimal core composed of APOBEC-1 and a complementation factor encoded by this gene. The gene product has three non-identical RNA recognition motifs and belongs to the hnRNP R family of RNA-binding proteins. It has been proposed that this complementation f…	GO:6381(mRNA editing); GO:6397(mRNA processing); GO:50821(protein stabilization)			apobec-1 complementation factor isoform 19			16055734; 15164054; 15148397; 14702039; 12896982; 12881431; 12477932; 11871661; 11815617; 11752456; 11718896; 11577082; 11571303; 11352648; 11329013; 11134005; 11072063; 10833526; 10781591; 10669775
A_32_P110888	A2LD17	0.468994	P	316067	372336	LOC87785	NM_033110	NM_033110	NM_033110	A2LD17	chr13:101183916-101183873	GO:0003839(gamma-glutamylcyclotransferase activity)|GO:0016746(transferase activity, transferring acyl groups)|GO:0042219(cellular modified amino acid catabolic process)	Hs.350868	ENST00000455100	Homo sapiens AIG2-like domain 1 (A2LD1), transcript variant 1, mRNA [NM_033110]	hs|13q32.19	THC2610206		AIG2-like domain 17	GCTGTATATCAGAGTGCGTATAGCACCATTCTTCCTAATTTTCAGATCAAGCTTCACAGC	181784		GO:0005554(molecular function unknown)					LOC87769 protein			14702039; 12477948
A_23_P116914	A2M	0.463552	P	318813	375570	CPAMD5; FWP007; S863-7; alpha 2M; DKFZp779B102	NM_000014	NM_000014	NM_000014	A2M	chr12:009221418-009221375	GO:0001869(negative regulation of complement activation, lectin pathway)|GO:0002576(platelet degranulation)|GO:0004867(serine-type endopeptidase inhibitor activity)|GO:0005515(protein binding)|GO:0005576(extracellular region)|GO:0005615(extracellular space)|GO:0005829(cytosol)|GO:0007264(small GTPase mediated signal transduction)|GO:0007596(blood coagulation)|GO:0007597(blood coagulation, intrins…	Hs.212838	ENST00000540099	Homo sapiens alpha-2-macroglobulin (A2M), mRNA [NM_000014]	hs|12p13.31	NP1253310	GO:0001869(negative regulation of complement activation, lectin pathway)|GO:0004867(serine-type endopeptidase inhibitor activity)|GO:0005576(extracellular region)|GO:0005615(extracellular space)|GO:0006953(acute-phase response)|GO:0007584(response to nutrient)|GO:0010037(response to carbon dioxide)|GO:0019899(enzyme binding)|GO:0019959(interleukin-8 binding)|GO:0019966(interleukin-1 binding)|GO:0…	alpha-2-macroglobulin	CTTGTTCTTCACGGTTCTGCAAGATGTCCCAGTAAGAGATCTGAAACCAGCCATAGTGAA	182425	GO:5576(extracellular region)	GO:19899(enzyme binding); GO:19966(interleukin-1 binding); GO:19959(interleukin-8 binding); GO:8320(protein carrier activity); GO:4867(serine-type endopeptidase inhibitor activity); GO:43120(tumor necrosis factor binding); GO:17114(wide-spectrum protease inhibitor activity)	Alpha-2-macroglobulin is a protease inhibitor and cytokine transporter. It inhibits many proteases, including trypsin, thrombin and collagenase. A2M is implicated in Alzheimer disease (AD) due to its ability to mediate the clearance and degradation of A-beta, the major component of beta-amyloid deposits.	GO:6886(intracellular protein transport); GO:51260(protein homooligomerization)			alpha-2-macroglobulin precursor	Alzheimer disease, susceptibility to; Emphysema due to alpha-2-macroglobulin deficiency	KEGG pathway: Alzheimer's disease 05010; KEGG pathway: Complement and coagulation cascades 04610; Reactome Event:Hemostasis 109598	17071617; 16910174; 16784755; 16641085; 16407218; 16335952; 16297527; 16232083; 15931081; 15910735; 15908432; 15611997; 15511627; 15489334; 15023809; 14760718; 14718574; 14715656; 14678766; 14675603; 14637088; 14506912; 12966032; 12755687; 12755614; 12754519; 12631277; 12477932; 12221172; 12194978; 12175343; 12062545; 12042276; 12015318; 11916201; 11910179; 11901360; 11823454; 11811950; 11435418;…
A_33_P3525279	A2ML17	0.45811	A	321559	378805		NM_144670	NM_144670	NM_144670	A2ML17	chr12:009027061-009027136	GO:0004867(serine-type endopeptidase inhibitor activity)|GO:0005576(extracellular region)|GO:0005615(extracellular space)|GO:0010466(negative regulation of peptidase activity)|GO:0030414(peptidase inhibitor activity)|GO:0052548(regulation of endopeptidase activity)	Hs.620532	ENST00000541459	Homo sapiens alpha-2-macroglobulin-like 1 (A2ML1), mRNA [NM_144670]	hs|12p13.31	NP1256229	GO:0004867(serine-type endopeptidase inhibitor activity)|GO:0005515(protein binding)|GO:0005576(extracellular region)|GO:0005615(extracellular space)|GO:0052548(regulation of endopeptidase activity)	alpha-2-macroglobulin-like 17	AAAGTGTGCTGGTCACCAACTTGAAACCAGCAACCATCAAGGTCTATGACTACTACCTAC	183065
A_24_P151138	A1BG	0.452668	A	324305	382040	A1B; ABG; GAB; HYST2477; DKFZp686F0987				A1BG	chr19:058857206-058857164	GO:0003674(molecular_function)|GO:0005576(extracellular region)|GO:0008150(biological_process)	Hs.529161		Homo sapiens cDNA FLJ31639 fis, clone NT2RI2003655, weakly similar to ZINC FINGER PROTEIN 195. [AK056201]	hs|19q13.43	THC2461029		alpha-1-B glycoprotein	GCTAGTGATCTGGTTTACTGCCTTAGTAATATCTAGTTCCTAATATGCCTATGCCTTTTA	183706	GO:5576(extracellular region)	GO:3674(molecular_function)	The protein encoded by this gene is a plasma glycoprotein of unknown function. The protein shows sequence similarity to the variable regions of some immunoglobulin supergene family member proteins.	GO:8150(biological_process)			alpha 1B-glycoprotein			16335952; 15489334; 15461460; 15221005; 14760718; 14702039; 12477932; 8889549; 3610142; 3458201; 2591084
A_33_P3685233	A1BG	0.447226	P	327051	385274		NM_130786	NM_130786	NM_130786	A1BG	chr19:058858293-058858251	GO:0003674(molecular_function)|GO:0005576(extracellular region)|GO:0008150(biological_process)	Hs.529161	ENST00000263100	Homo sapiens alpha-1-B glycoprotein (A1BG), mRNA [NM_130786]	hs|19q13.43	THC2461029	GO:0003674(molecular_function)|GO:0005576(extracellular region)|GO:0008150(biological_process)	alpha-1-B glycoprotein	TCTCTGGGGGGCTGGAGAAGCCTCCCTCATTCCTCCCAGGAATTAATAAATGTGAAGAGA	184346
A_24_P721716	A1BG-AS18	0.441784	A	329797	388509	FLJ23586	NR_015380	NR_015380	NR_015380	A1BG-AS18	chr19:058866199-058866275		Hs.709582		Homo sapiens A1BG antisense RNA 1 (non-protein coding) (A1BG-AS1), non-coding RNA [NR_015380]	hs|19q13.43	NP30595373		A1BG antisense RNA 1 (non-protein coding)	AGGGTGTGCACAGAACTCAGAAGTCAGACCACTGAACAGTGACAGAACCTTTCAGCCCAT	184987					FLI_CDNA; oligo capping; fis (full insert sequence)					12477949
A_23_P104241	A1CF	0.436342	P	332542	391744	ACF; ASP; ACF64; ACF65; MGC163391; RP11-564C4.19	NM_138933	NM_138933	NM_138933	A1CF	chr10:052570857-052570817	GO:0000166(nucleotide binding)|GO:0003676(nucleic acid binding)|GO:0003723(RNA binding)|GO:0003725(double-stranded RNA binding)|GO:0003727(single-stranded RNA binding)|GO:0003729(mRNA binding)|GO:0004131(cytosine deaminase activity)|GO:0005515(protein binding)|GO:0005622(intracellular)|GO:0005634(nucleus)|GO:0005654(nucleoplasm)|GO:0005720(nuclear heterochromatin)|GO:0005737(cytoplasm)|GO:0005783…	Hs.282795	ENST00000395489	Homo sapiens APOBEC1 complementation factor (A1CF), transcript variant 3, mRNA [NM_138933]	hs|10q11.40	NP31529198	GO:0000166(nucleotide binding)|GO:0003725(double-stranded RNA binding)|GO:0003727(single-stranded RNA binding)|GO:0005515(protein binding)|GO:0005634(nucleus)|GO:0005737(cytoplasm)|GO:0005783(endoplasmic reticulum)|GO:0006397(mRNA processing)|GO:0030895(apolipoprotein B mRNA editing enzyme complex)|GO:0050821(protein stabilization)	APOBEC1 complementation factor	GACAGCTATTCTTGTACAAAATAACTATTCCTGCTCTAGCCAGCCAGAATCCTGCAATCC	185627	GO:30895(apolipoprotein B mRNA editing enzyme complex); GO:5737(cytoplasm); GO:5634(nucleus)	GO:3725(double-stranded RNA binding); GO:3676(nucleic acid binding); GO:166(nucleotide binding); GO:5515(protein binding); GO:3727(single-stranded RNA binding)	Mammalian apolipoprotein B mRNA undergoes site-specific C to U deamination, which is mediated by a multi-component enzyme complex containing a minimal core composed of APOBEC-1 and a complementation factor encoded by this gene. The gene product has three non-identical RNA recognition motifs and belongs to the hnRNP R family of RNA-binding proteins. It has been proposed that this complementation f…	GO:6381(mRNA editing); GO:6397(mRNA processing); GO:50821(protein stabilization)			apobec-1 complementation factor isoform 20			16055734; 15164054; 15148397; 14702039; 12896982; 12881431; 12477932; 11871661; 11815617; 11752456; 11718896; 11577082; 11571303; 11352648; 11329013; 11134005; 11072063; 10833526; 10781591; 10669776
A_32_P110889	A2LD18	0.430901	P	335288	394978	LOC87786	NM_033110	NM_033110	NM_033110	A2LD18	chr13:101183916-101183874	GO:0003839(gamma-glutamylcyclotransferase activity)|GO:0016746(transferase activity, transferring acyl groups)|GO:0042219(cellular modified amino acid catabolic process)	Hs.350868	ENST00000455100	Homo sapiens AIG2-like domain 1 (A2LD1), transcript variant 1, mRNA [NM_033110]	hs|13q32.20	THC2610207		AIG2-like domain 18	GCTGTATATCAGAGTGCGTATAGCACCATTCTTCCTAATTTTCAGATCAAGCTTCACAGC	186268		GO:0005554(molecular function unknown)					LOC87769 protein			14702039; 12477949
A_23_P116915	A2M	0.425459	P	338034	398213	CPAMD5; FWP007; S863-7; alpha 2M; DKFZp779B103	NM_000014	NM_000014	NM_000014	A2M	chr12:009221418-009221376	GO:0001869(negative regulation of complement activation, lectin pathway)|GO:0002576(platelet degranulation)|GO:0004867(serine-type endopeptidase inhibitor activity)|GO:0005515(protein binding)|GO:0005576(extracellular region)|GO:0005615(extracellular space)|GO:0005829(cytosol)|GO:0007264(small GTPase mediated signal transduction)|GO:0007596(blood coagulation)|GO:0007597(blood coagulation, intrins…	Hs.212838	ENST00000540099	Homo sapiens alpha-2-macroglobulin (A2M), mRNA [NM_000014]	hs|12p13.31	NP1259148	GO:0001869(negative regulation of complement activation, lectin pathway)|GO:0004867(serine-type endopeptidase inhibitor activity)|GO:0005576(extracellular region)|GO:0005615(extracellular space)|GO:0006953(acute-phase response)|GO:0007584(response to nutrient)|GO:0010037(response to carbon dioxide)|GO:0019899(enzyme binding)|GO:0019959(interleukin-8 binding)|GO:0019966(interleukin-1 binding)|GO:0…	alpha-2-macroglobulin	CTTGTTCTTCACGGTTCTGCAAGATGTCCCAGTAAGAGATCTGAAACCAGCCATAGTGAA	186908	GO:5576(extracellular region)	GO:19899(enzyme binding); GO:19966(interleukin-1 binding); GO:19959(interleukin-8 binding); GO:8320(protein carrier activity); GO:4867(serine-type endopeptidase inhibitor activity); GO:43120(tumor necrosis factor binding); GO:17114(wide-spectrum protease inhibitor activity)	Alpha-2-macroglobulin is a protease inhibitor and cytokine transporter. It inhibits many proteases, including trypsin, thrombin and collagenase. A2M is implicated in Alzheimer disease (AD) due to its ability to mediate the clearance and degradation of A-beta, the major component of beta-amyloid deposits.	GO:6886(intracellular protein transport); GO:51260(protein homooligomerization)			alpha-2-macroglobulin precursor	Alzheimer disease, susceptibility to; Emphysema due to alpha-2-macroglobulin deficiency	KEGG pathway: Alzheimer's disease 05010; KEGG pathway: Complement and coagulation cascades 04610; Reactome Event:Hemostasis 109599	17071617; 16910174; 16784755; 16641085; 16407218; 16335952; 16297527; 16232083; 15931081; 15910735; 15908432; 15611997; 15511627; 15489334; 15023809; 14760718; 14718574; 14715656; 14678766; 14675603; 14637088; 14506912; 12966032; 12755687; 12755614; 12754519; 12631277; 12477932; 12221172; 12194978; 12175343; 12062545; 12042276; 12015318; 11916201; 11910179; 11901360; 11823454; 11811950; 11435418;…
A_33_P3525280	A2ML18	0.420017	A	340780	401448		NM_144670	NM_144670	NM_144670	A2ML18	chr12:009027061-009027137	GO:0004867(serine-type endopeptidase inhibitor activity)|GO:0005576(extracellular region)|GO:0005615(extracellular space)|GO:0010466(negative regulation of peptidase activity)|GO:0030414(peptidase inhibitor activity)|GO:0052548(regulation of endopeptidase activity)	Hs.620532	ENST00000541459	Homo sapiens alpha-2-macroglobulin-like 1 (A2ML1), mRNA [NM_144670]	hs|12p13.31	NP1262067	GO:0004867(serine-type endopeptidase inhibitor activity)|GO:0005515(protein binding)|GO:0005576(extracellular region)|GO:0005615(extracellular space)|GO:0052548(regulation of endopeptidase activity)	alpha-2-macroglobulin-like 18	AAAGTGTGCTGGTCACCAACTTGAAACCAGCAACCATCAAGGTCTATGACTACTACCTAC	187549
A_24_P151139	A1BG	0.414575	A	343526	404682	A1B; ABG; GAB; HYST2477; DKFZp686F0988				A1BG	chr19:058857206-058857165	GO:0003674(molecular_function)|GO:0005576(extracellular region)|GO:0008150(biological_process)	Hs.529161		Homo sapiens cDNA FLJ31639 fis, clone NT2RI2003655, weakly similar to ZINC FINGER PROTEIN 195. [AK056201]	hs|19q13.43	THC2461029		alpha-1-B glycoprotein	GCTAGTGATCTGGTTTACTGCCTTAGTAATATCTAGTTCCTAATATGCCTATGCCTTTTA	188189	GO:5576(extracellular region)	GO:3674(molecular_function)	The protein encoded by this gene is a plasma glycoprotein of unknown function. The protein shows sequence similarity to the variable regions of some immunoglobulin supergene family member proteins.	GO:8150(biological_process)			alpha 1B-glycoprotein			16335952; 15489334; 15461460; 15221005; 14760718; 14702039; 12477932; 8889549; 3610142; 3458201; 2591085
A_33_P3685234	A1BG	0.409133	P	346272	407917		NM_130786	NM_130786	NM_130786	A1BG	chr19:058858293-058858252	GO:0003674(molecular_function)|GO:0005576(extracellular region)|GO:0008150(biological_process)	Hs.529161	ENST00000263100	Homo sapiens alpha-1-B glycoprotein (A1BG), mRNA [NM_130786]	hs|19q13.43	THC2461029	GO:0003674(molecular_function)|GO:0005576(extracellular region)|GO:0008150(biological_process)	alpha-1-B glycoprotein	TCTCTGGGGGGCTGGAGAAGCCTCCCTCATTCCTCCCAGGAATTAATAAATGTGAAGAGA	188830
A_24_P721717	A1BG-AS19	0.403691	A	349018	411152	FLJ23587	NR_015380	NR_015380	NR_015380	A1BG-AS19	chr19:058866199-058866276		Hs.709582		Homo sapiens A1BG antisense RNA 1 (non-protein coding) (A1BG-AS1), non-coding RNA [NR_015380]	hs|19q13.43	NP32463023		A1BG antisense RNA 1 (non-protein coding)	AGGGTGTGCACAGAACTCAGAAGTCAGACCACTGAACAGTGACAGAACCTTTCAGCCCAT	189470					FLI_CDNA; oligo capping; fis (full insert sequence)					12477950
A_23_P104242	A1CF	0.398249	P	351764	414386	ACF; ASP; ACF64; ACF65; MGC163391; RP11-564C4.20	NM_138933	NM_138933	NM_138933	A1CF	chr10:052570857-052570818	GO:0000166(nucleotide binding)|GO:0003676(nucleic acid binding)|GO:0003723(RNA binding)|GO:0003725(double-stranded RNA binding)|GO:0003727(single-stranded RNA binding)|GO:0003729(mRNA binding)|GO:0004131(cytosine deaminase activity)|GO:0005515(protein binding)|GO:0005622(intracellular)|GO:0005634(nucleus)|GO:0005654(nucleoplasm)|GO:0005720(nuclear heterochromatin)|GO:0005737(cytoplasm)|GO:0005783…	Hs.282795	ENST00000395489	Homo sapiens APOBEC1 complementation factor (A1CF), transcript variant 3, mRNA [NM_138933]	hs|10q11.41	NP33396848	GO:0000166(nucleotide binding)|GO:0003725(double-stranded RNA binding)|GO:0003727(single-stranded RNA binding)|GO:0005515(protein binding)|GO:0005634(nucleus)|GO:0005737(cytoplasm)|GO:0005783(endoplasmic reticulum)|GO:0006397(mRNA processing)|GO:0030895(apolipoprotein B mRNA editing enzyme complex)|GO:0050821(protein stabilization)	APOBEC1 complementation factor	GACAGCTATTCTTGTACAAAATAACTATTCCTGCTCTAGCCAGCCAGAATCCTGCAATCC	190111	GO:30895(apolipoprotein B mRNA editing enzyme complex); GO:5737(cytoplasm); GO:5634(nucleus)	GO:3725(double-stranded RNA binding); GO:3676(nucleic acid binding); GO:166(nucleotide binding); GO:5515(protein binding); GO:3727(single-stranded RNA binding)	Mammalian apolipoprotein B mRNA undergoes site-specific C to U deamination, which is mediated by a multi-component enzyme complex containing a minimal core composed of APOBEC-1 and a complementation factor encoded by this gene. The gene product has three non-identical RNA recognition motifs and belongs to the hnRNP R family of RNA-binding proteins. It has been proposed that this complementation f…	GO:6381(mRNA editing); GO:6397(mRNA processing); GO:50821(protein stabilization)			apobec-1 complementation factor isoform 21			16055734; 15164054; 15148397; 14702039; 12896982; 12881431; 12477932; 11871661; 11815617; 11752456; 11718896; 11577082; 11571303; 11352648; 11329013; 11134005; 11072063; 10833526; 10781591; 10669777
A_32_P110890	A2LD19	0.392807	P	354510	417621	LOC87787	NM_033110	NM_033110	NM_033110	A2LD19	chr13:101183916-101183875	GO:0003839(gamma-glutamylcyclotransferase activity)|GO:0016746(transferase activity, transferring acyl groups)|GO:0042219(cellular modified amino acid catabolic process)	Hs.350868	ENST00000455100	Homo sapiens AIG2-like domain 1 (A2LD1), transcript variant 1, mRNA [NM_033110]	hs|13q32.21	THC2610208		AIG2-like domain 19	GCTGTATATCAGAGTGCGTATAGCACCATTCTTCCTAATTTTCAGATCAAGCTTCACAGC	190751		GO:0005554(molecular function unknown)					LOC87769 protein			14702039; 12477950
A_23_P116916	A2M	0.387366	P	357256	420856	CPAMD5; FWP007; S863-7; alpha 2M; DKFZp779B104	NM_000014	NM_000014	NM_000014	A2M	chr12:009221418-009221377	GO:0001869(negative regulation of complement activation, lectin pathway)|GO:0002576(platelet degranulation)|GO:0004867(serine-type endopeptidase inhibitor activity)|GO:0005515(protein binding)|GO:0005576(extracellular region)|GO:0005615(extracellular space)|GO:0005829(cytosol)|GO:0007264(small GTPase mediated signal transduction)|GO:0007596(blood coagulation)|GO:0007597(blood coagulation, intrins…	Hs.212838	ENST00000540099	Homo sapiens alpha-2-macroglobulin (A2M), mRNA [NM_000014]	hs|12p13.31	NP1264986	GO:0001869(negative regulation of complement activation, lectin pathway)|GO:0004867(serine-type endopeptidase inhibitor activity)|GO:0005576(extracellular region)|GO:0005615(extracellular space)|GO:0006953(acute-phase response)|GO:0007584(response to nutrient)|GO:0010037(response to carbon dioxide)|GO:0019899(enzyme binding)|GO:0019959(interleukin-8 binding)|GO:0019966(interleukin-1 binding)|GO:0…	alpha-2-macroglobulin	CTTGTTCTTCACGGTTCTGCAAGATGTCCCAGTAAGAGATCTGAAACCAGCCATAGTGAA	191392	GO:5576(extracellular region)	GO:19899(enzyme binding); GO:19966(interleukin-1 binding); GO:19959(interleukin-8 binding); GO:8320(protein carrier activity); GO:4867(serine-type endopeptidase inhibitor activity); GO:43120(tumor necrosis factor binding); GO:17114(wide-spectrum protease inhibitor activity)	Alpha-2-macroglobulin is a protease inhibitor and cytokine transporter. It inhibits many proteases, including trypsin, thrombin and collagenase. A2M is implicated in Alzheimer disease (AD) due to its ability to mediate the clearance and degradation of A-beta, the major component of beta-amyloid deposits.	GO:6886(intracellular protein transport); GO:51260(protein homooligomerization)			alpha-2-macroglobulin precursor	Alzheimer disease, susceptibility to; Emphysema due to alpha-2-macroglobulin deficiency	KEGG pathway: Alzheimer's disease 05010; KEGG pathway: Complement and coagulation cascades 04610; Reactome Event:Hemostasis 109600	17071617; 16910174; 16784755; 16641085; 16407218; 16335952; 16297527; 16232083; 15931081; 15910735; 15908432; 15611997; 15511627; 15489334; 15023809; 14760718; 14718574; 14715656; 14678766; 14675603; 14637088; 14506912; 12966032; 12755687; 12755614; 12754519; 12631277; 12477932; 12221172; 12194978; 12175343; 12062545; 12042276; 12015318; 11916201; 11910179; 11901360; 11823454; 11811950; 11435418;…
A_33_P3525281	A2ML19	0.381924	A	360002	424090		NM_144670	NM_144670	NM_144670	A2ML19	chr12:009027061-009027138	GO:0004867(serine-type endopeptidase inhibitor activity)|GO:0005576(extracellular region)|GO:0005615(extracellular space)|GO:0010466(negative regulation of peptidase activity)|GO:0030414(peptidase inhibitor activity)|GO:0052548(regulation of endopeptidase activity)	Hs.620532	ENST00000541459	Homo sapiens alpha-2-macroglobulin-like 1 (A2ML1), mRNA [NM_144670]	hs|12p13.31	NP1267905	GO:0004867(serine-type endopeptidase inhibitor activity)|GO:0005515(protein binding)|GO:0005576(extracellular region)|GO:0005615(extracellular space)|GO:0052548(regulation of endopeptidase activity)	alpha-2-macroglobulin-like 19	AAAGTGTGCTGGTCACCAACTTGAAACCAGCAACCATCAAGGTCTATGACTACTACCTAC	192032
A_24_P151140	A1BG	0.376482	A	362748	427325	A1B; ABG; GAB; HYST2477; DKFZp686F0989				A1BG	chr19:058857206-058857166	GO:0003674(molecular_function)|GO:0005576(extracellular region)|GO:0008150(biological_process)	Hs.529161		Homo sapiens cDNA FLJ31639 fis, clone NT2RI2003655, weakly similar to ZINC FINGER PROTEIN 195. [AK056201]	hs|19q13.43	THC2461029		alpha-1-B glycoprotein	GCTAGTGATCTGGTTTACTGCCTTAGTAATATCTAGTTCCTAATATGCCTATGCCTTTTA	192673	GO:5576(extracellular region)	GO:3674(molecular_function)	The protein encoded by this gene is a plasma glycoprotein of unknown function. The protein shows sequence similarity to the variable regions of some immunoglobulin supergene family member proteins.	GO:8150(biological_process)			alpha 1B-glycoprotein			16335952; 15489334; 15461460; 15221005; 14760718; 14702039; 12477932; 8889549; 3610142; 3458201; 2591086
A_33_P3685235	A1BG	0.37104	P	365494	430560		NM_130786	NM_130786	NM_130786	A1BG	chr19:058858293-058858253	GO:0003674(molecular_function)|GO:0005576(extracellular region)|GO:0008150(biological_process)	Hs.529161	ENST00000263100	Homo sapiens alpha-1-B glycoprotein (A1BG), mRNA [NM_130786]	hs|19q13.43	THC2461029	GO:0003674(molecular_function)|GO:0005576(extracellular region)|GO:0008150(biological_process)	alpha-1-B glycoprotein	TCTCTGGGGGGCTGGAGAAGCCTCCCTCATTCCTCCCAGGAATTAATAAATGTGAAGAGA	193313
A_24_P721718	A1BG-AS20	0.365598	A	368240	433794	FLJ23588	NR_015380	NR_015380	NR_015380	A1BG-AS20	chr19:058866199-058866277		Hs.709582		Homo sapiens A1BG antisense RNA 1 (non-protein coding) (A1BG-AS1), non-coding RNA [NR_015380]	hs|19q13.43	NP34330673		A1BG antisense RNA 1 (non-protein coding)	AGGGTGTGCACAGAACTCAGAAGTCAGACCACTGAACAGTGACAGAACCTTTCAGCCCAT	193954					FLI_CDNA; oligo capping; fis (full insert sequence)					12477951
A_23_P104243	A1CF	0.360156	P	370986	437029	ACF; ASP; ACF64; ACF65; MGC163391; RP11-564C4.21	NM_138933	NM_138933	NM_138933	A1CF	chr10:052570857-052570819	GO:0000166(nucleotide binding)|GO:0003676(nucleic acid binding)|GO:0003723(RNA binding)|GO:0003725(double-stranded RNA binding)|GO:0003727(single-stranded RNA binding)|GO:0003729(mRNA binding)|GO:0004131(cytosine deaminase activity)|GO:0005515(protein binding)|GO:0005622(intracellular)|GO:0005634(nucleus)|GO:0005654(nucleoplasm)|GO:0005720(nuclear heterochromatin)|GO:0005737(cytoplasm)|GO:0005783…	Hs.282795	ENST00000395489	Homo sapiens APOBEC1 complementation factor (A1CF), transcript variant 3, mRNA [NM_138933]	hs|10q11.42	NP35264498	GO:0000166(nucleotide binding)|GO:0003725(double-stranded RNA binding)|GO:0003727(single-stranded RNA binding)|GO:0005515(protein binding)|GO:0005634(nucleus)|GO:0005737(cytoplasm)|GO:0005783(endoplasmic reticulum)|GO:0006397(mRNA processing)|GO:0030895(apolipoprotein B mRNA editing enzyme complex)|GO:0050821(protein stabilization)	APOBEC1 complementation factor	GACAGCTATTCTTGTACAAAATAACTATTCCTGCTCTAGCCAGCCAGAATCCTGCAATCC	194594	GO:30895(apolipoprotein B mRNA editing enzyme complex); GO:5737(cytoplasm); GO:5634(nucleus)	GO:3725(double-stranded RNA binding); GO:3676(nucleic acid binding); GO:166(nucleotide binding); GO:5515(protein binding); GO:3727(single-stranded RNA binding)	Mammalian apolipoprotein B mRNA undergoes site-specific C to U deamination, which is mediated by a multi-component enzyme complex containing a minimal core composed of APOBEC-1 and a complementation factor encoded by this gene. The gene product has three non-identical RNA recognition motifs and belongs to the hnRNP R family of RNA-binding proteins. It has been proposed that this complementation f…	GO:6381(mRNA editing); GO:6397(mRNA processing); GO:50821(protein stabilization)			apobec-1 complementation factor isoform 22			16055734; 15164054; 15148397; 14702039; 12896982; 12881431; 12477932; 11871661; 11815617; 11752456; 11718896; 11577082; 11571303; 11352648; 11329013; 11134005; 11072063; 10833526; 10781591; 10669778
A_32_P110891	A2LD20	0.354714	P	373731	440263	LOC87788	NM_033110	NM_033110	NM_033110	A2LD20	chr13:101183916-101183876	GO:0003839(gamma-glutamylcyclotransferase activity)|GO:0016746(transferase activity, transferring acyl groups)|GO:0042219(cellular modified amino acid catabolic process)	Hs.350868	ENST00000455100	Homo sapiens AIG2-like domain 1 (A2LD1), transcript variant 1, mRNA [NM_033110]	hs|13q32.22	THC2610209		AIG2-like domain 20	GCTGTATATCAGAGTGCGTATAGCACCATTCTTCCTAATTTTCAGATCAAGCTTCACAGC	195235		GO:0005554(molecular function unknown)					LOC87769 protein			14702039; 12477951
A_23_P116917	A2M	0.349272	P	376477	443498	CPAMD5; FWP007; S863-7; alpha 2M; DKFZp779B105	NM_000014	NM_000014	NM_000014	A2M	chr12:009221418-009221378	GO:0001869(negative regulation of complement activation, lectin pathway)|GO:0002576(platelet degranulation)|GO:0004867(serine-type endopeptidase inhibitor activity)|GO:0005515(protein binding)|GO:0005576(extracellular region)|GO:0005615(extracellular space)|GO:0005829(cytosol)|GO:0007264(small GTPase mediated signal transduction)|GO:0007596(blood coagulation)|GO:0007597(blood coagulation, intrins…	Hs.212838	ENST00000540099	Homo sapiens alpha-2-macroglobulin (A2M), mRNA [NM_000014]	hs|12p13.31	NP1270824	GO:0001869(negative regulation of complement activation, lectin pathway)|GO:0004867(serine-type endopeptidase inhibitor activity)|GO:0005576(extracellular region)|GO:0005615(extracellular space)|GO:0006953(acute-phase response)|GO:0007584(response to nutrient)|GO:0010037(response to carbon dioxide)|GO:0019899(enzyme binding)|GO:0019959(interleukin-8 binding)|GO:0019966(interleukin-1 binding)|GO:0…	alpha-2-macroglobulin	CTTGTTCTTCACGGTTCTGCAAGATGTCCCAGTAAGAGATCTGAAACCAGCCATAGTGAA	195875	GO:5576(extracellular region)	GO:19899(enzyme binding); GO:19966(interleukin-1 binding); GO:19959(interleukin-8 binding); GO:8320(protein carrier activity); GO:4867(serine-type endopeptidase inhibitor activity); GO:43120(tumor necrosis factor binding); GO:17114(wide-spectrum protease inhibitor activity)	Alpha-2-macroglobulin is a protease inhibitor and cytokine transporter. It inhibits many proteases, including trypsin, thrombin and collagenase. A2M is implicated in Alzheimer disease (AD) due to its ability to mediate the clearance and degradation of A-beta, the major component of beta-amyloid deposits.	GO:6886(intracellular protein transport); GO:51260(protein homooligomerization)			alpha-2-macroglobulin precursor	Alzheimer disease, susceptibility to; Emphysema due to alpha-2-macroglobulin deficiency	KEGG pathway: Alzheimer's disease 05010; KEGG pathway: Complement and coagulation cascades 04610; Reactome Event:Hemostasis 109601	17071617; 16910174; 16784755; 16641085; 16407218; 16335952; 16297527; 16232083; 15931081; 15910735; 15908432; 15611997; 15511627; 15489334; 15023809; 14760718; 14718574; 14715656; 14678766; 14675603; 14637088; 14506912; 12966032; 12755687; 12755614; 12754519; 12631277; 12477932; 12221172; 12194978; 12175343; 12062545; 12042276; 12015318; 11916201; 11910179; 11901360; 11823454; 11811950; 11435418;…
A_33_P3525282	A2ML20	0.343831	A	379223	446733		NM_144670	NM_144670	NM_144670	A2ML20	chr12:009027061-009027139	GO:0004867(serine-type endopeptidase inhibitor activity)|GO:0005576(extracellular region)|GO:0005615(extracellular space)|GO:0010466(negative regulation of peptidase activity)|GO:0030414(peptidase inhibitor activity)|GO:0052548(regulation of endopeptidase activity)	Hs.620532	ENST00000541459	Homo sapiens alpha-2-macroglobulin-like 1 (A2ML1), mRNA [NM_144670]	hs|12p13.31	NP1273743	GO:0004867(serine-type endopeptidase inhibitor activity)|GO:0005515(protein binding)|GO:0005576(extracellular region)|GO:0005615(extracellular space)|GO:0052548(regulation of endopeptidase activity)	alpha-2-macroglobulin-like 20	AAAGTGTGCTGGTCACCAACTTGAAACCAGCAACCATCAAGGTCTATGACTACTACCTAC	196516
A_24_P151141	A1BG	0.338389	A	381969	449967	A1B; ABG; GAB; HYST2477; DKFZp686F0990				A1BG	chr19:058857206-058857167	GO:0003674(molecular_function)|GO:0005576(extracellular region)|GO:0008150(biological_process)	Hs.529161		Homo sapiens cDNA FLJ31639 fis, clone NT2RI2003655, weakly similar to ZINC FINGER PROTEIN 195. [AK056201]	hs|19q13.43	THC2461029		alpha-1-B glycoprotein	GCTAGTGATCTGGTTTACTGCCTTAGTAATATCTAGTTCCTAATATGCCTATGCCTTTTA	197156	GO:5576(extracellular region)	GO:3674(molecular_function)	The protein encoded by this gene is a plasma glycoprotein of unknown function. The protein shows sequence similarity to the variable regions of some immunoglobulin supergene family member proteins.	GO:8150(biological_process)			alpha 1B-glycoprotein			16335952; 15489334; 15461460; 15221005; 14760718; 14702039; 12477932; 8889549; 3610142; 3458201; 2591087
A_33_P3685236	A1BG	0.332947	P	384715	453202		NM_130786	NM_130786	NM_130786	A1BG	chr19:058858293-058858254	GO:0003674(molecular_function)|GO:0005576(extracellular region)|GO:0008150(biological_process)	Hs.529161	ENST00000263100	Homo sapiens alpha-1-B glycoprotein (A1BG), mRNA [NM_130786]	hs|19q13.43	THC2461029	GO:0003674(molecular_function)|GO:0005576(extracellular region)|GO:0008150(biological_process)	alpha-1-B glycoprotein	TCTCTGGGGGGCTGGAGAAGCCTCCCTCATTCCTCCCAGGAATTAATAAATGTGAAGAGA	197797
A_24_P721719	A1BG-AS21	0.327505	A	387461	456437	FLJ23589	NR_015380	NR_015380	NR_015380	A1BG-AS21	chr19:058866199-058866278		Hs.709582		Homo sapiens A1BG antisense RNA 1 (non-protein coding) (A1BG-AS1), non-coding RNA [NR_015380]	hs|19q13.43	NP36198323		A1BG antisense RNA 1 (non-protein coding)	AGGGTGTGCACAGAACTCAGAAGTCAGACCACTGAACAGTGACAGAACCTTTCAGCCCAT	198437					FLI_CDNA; oligo capping; fis (full insert sequence)					12477952
A_23_P104244	A1CF	0.322063	P	390207	459671	ACF; ASP; ACF64; ACF65; MGC163391; RP11-564C4.22	NM_138933	NM_138933	NM_138933	A1CF	chr10:052570857-052570820	GO:0000166(nucleotide binding)|GO:0003676(nucleic acid binding)|GO:0003723(RNA binding)|GO:0003725(double-stranded RNA binding)|GO:0003727(single-stranded RNA binding)|GO:0003729(mRNA binding)|GO:0004131(cytosine deaminase activity)|GO:0005515(protein binding)|GO:0005622(intracellular)|GO:0005634(nucleus)|GO:0005654(nucleoplasm)|GO:0005720(nuclear heterochromatin)|GO:0005737(cytoplasm)|GO:0005783…	Hs.282795	ENST00000395489	Homo sapiens APOBEC1 complementation factor (A1CF), transcript variant 3, mRNA [NM_138933]	hs|10q11.43	NP37132148	GO:0000166(nucleotide binding)|GO:0003725(double-stranded RNA binding)|GO:0003727(single-stranded RNA binding)|GO:0005515(protein binding)|GO:0005634(nucleus)|GO:0005737(cytoplasm)|GO:0005783(endoplasmic reticulum)|GO:0006397(mRNA processing)|GO:0030895(apolipoprotein B mRNA editing enzyme complex)|GO:0050821(protein stabilization)	APOBEC1 complementation factor	GACAGCTATTCTTGTACAAAATAACTATTCCTGCTCTAGCCAGCCAGAATCCTGCAATCC	199078	GO:30895(apolipoprotein B mRNA editing enzyme complex); GO:5737(cytoplasm); GO:5634(nucleus)	GO:3725(double-stranded RNA binding); GO:3676(nucleic acid binding); GO:166(nucleotide binding); GO:5515(protein binding); GO:3727(single-stranded RNA binding)	Mammalian apolipoprotein B mRNA undergoes site-specific C to U deamination, which is mediated by a multi-component enzyme complex containing a minimal core composed of APOBEC-1 and a complementation factor encoded by this gene. The gene product has three non-identical RNA recognition motifs and belongs to the hnRNP R family of RNA-binding proteins. It has been proposed that this complementation f…	GO:6381(mRNA editing); GO:6397(mRNA processing); GO:50821(protein stabilization)			apobec-1 complementation factor isoform 23			16055734; 15164054; 15148397; 14702039; 12896982; 12881431; 12477932; 11871661; 11815617; 11752456; 11718896; 11577082; 11571303; 11352648; 11329013; 11134005; 11072063; 10833526; 10781591; 10669779
A_32_P110892	A2LD21	0.316621	P	392953	462906	LOC87789	NM_033110	NM_033110	NM_033110	A2LD21	chr13:101183916-101183877	GO:0003839(gamma-glutamylcyclotransferase activity)|GO:0016746(transferase activity, transferring acyl groups)|GO:0042219(cellular modified amino acid catabolic process)	Hs.350868	ENST00000455100	Homo sapiens AIG2-like domain 1 (A2LD1), transcript variant 1, mRNA [NM_033110]	hs|13q32.23	THC2610210		AIG2-like domain 21	GCTGTATATCAGAGTGCGTATAGCACCATTCTTCCTAATTTTCAGATCAAGCTTCACAGC	199718		GO:0005554(molecular function unknown)					LOC87769 protein			14702039; 12477952
A_23_P116918	A2M	0.311179	P	395699	466141	CPAMD5; FWP007; S863-7; alpha 2M; DKFZp779B106	NM_000014	NM_000014	NM_000014	A2M	chr12:009221418-009221379	GO:0001869(negative regulation of complement activation, lectin pathway)|GO:0002576(platelet degranulation)|GO:0004867(serine-type endopeptidase inhibitor activity)|GO:0005515(protein binding)|GO:0005576(extracellular region)|GO:0005615(extracellular space)|GO:0005829(cytosol)|GO:0007264(small GTPase mediated signal transduction)|GO:0007596(blood coagulation)|GO:0007597(blood coagulation, intrins…	Hs.212838	ENST00000540099	Homo sapiens alpha-2-macroglobulin (A2M), mRNA [NM_000014]	hs|12p13.31	NP1276662	GO:0001869(negative regulation of complement activation, lectin pathway)|GO:0004867(serine-type endopeptidase inhibitor activity)|GO:0005576(extracellular region)|GO:0005615(extracellular space)|GO:0006953(acute-phase response)|GO:0007584(response to nutrient)|GO:0010037(response to carbon dioxide)|GO:0019899(enzyme binding)|GO:0019959(interleukin-8 binding)|GO:0019966(interleukin-1 binding)|GO:0…	alpha-2-macroglobulin	CTTGTTCTTCACGGTTCTGCAAGATGTCCCAGTAAGAGATCTGAAACCAGCCATAGTGAA	200359	GO:5576(extracellular region)	GO:19899(enzyme binding); GO:19966(interleukin-1 binding); GO:19959(interleukin-8 binding); GO:8320(protein carrier activity); GO:4867(serine-type endopeptidase inhibitor activity); GO:43120(tumor necrosis factor binding); GO:17114(wide-spectrum protease inhibitor activity)	Alpha-2-macroglobulin is a protease inhibitor and cytokine transporter. It inhibits many proteases, including trypsin, thrombin and collagenase. A2M is implicated in Alzheimer disease (AD) due to its ability to mediate the clearance and degradation of A-beta, the major component of beta-amyloid deposits.	GO:6886(intracellular protein transport); GO:51260(protein homooligomerization)			alpha-2-macroglobulin precursor	Alzheimer disease, susceptibility to; Emphysema due to alpha-2-macroglobulin deficiency	KEGG pathway: Alzheimer's disease 05010; KEGG pathway: Complement and coagulation cascades 04610; Reactome Event:Hemostasis 109602	17071617; 16910174; 16784755; 16641085; 16407218; 16335952; 16297527; 16232083; 15931081; 15910735; 15908432; 15611997; 15511627; 15489334; 15023809; 14760718; 14718574; 14715656; 14678766; 14675603; 14637088; 14506912; 12966032; 12755687; 12755614; 12754519; 12631277; 12477932; 12221172; 12194978; 12175343; 12062545; 12042276; 12015318; 11916201; 11910179; 11901360; 11823454; 11811950; 11435418;…
A_33_P3525283	A2ML21	0.305737	A	398445	469375		NM_144670	NM_144670	NM_144670	A2ML21	chr12:009027061-009027140	GO:0004867(serine-type endopeptidase inhibitor activity)|GO:0005576(extracellular region)|GO:0005615(extracellular space)|GO:0010466(negative regulation of peptidase activity)|GO:0030414(peptidase inhibitor activity)|GO:0052548(regulation of endopeptidase activity)	Hs.620532	ENST00000541459	Homo sapiens alpha-2-macroglobulin-like 1 (A2ML1), mRNA [NM_144670]	hs|12p13.31	NP1279581	GO:0004867(serine-type endopeptidase inhibitor activity)|GO:0005515(protein binding)|GO:0005576(extracellular region)|GO:0005615(extracellular space)|GO:0052548(regulation of endopeptidase activity)	alpha-2-macroglobulin-like 21	AAAGTGTGCTGGTCACCAACTTGAAACCAGCAACCATCAAGGTCTATGACTACTACCTAC	200999
A_24_P151142	A1BG	0.300296	A	401191	472610	A1B; ABG; GAB; HYST2477; DKFZp686F0991				A1BG	chr19:058857206-058857168	GO:0003674(molecular_function)|GO:0005576(extracellular region)|GO:0008150(biological_process)	Hs.529161		Homo sapiens cDNA FLJ31639 fis, clone NT2RI2003655, weakly similar to ZINC FINGER PROTEIN 195. [AK056201]	hs|19q13.43	THC2461029		alpha-1-B glycoprotein	GCTAGTGATCTGGTTTACTGCCTTAGTAATATCTAGTTCCTAATATGCCTATGCCTTTTA	201640	GO:5576(extracellular region)	GO:3674(molecular_function)	The protein encoded by this gene is a plasma glycoprotein of unknown function. The protein shows sequence similarity to the variable regions of some immunoglobulin supergene family member proteins.	GO:8150(biological_process)			alpha 1B-glycoprotein			16335952; 15489334; 15461460; 15221005; 14760718; 14702039; 12477932; 8889549; 3610142; 3458201; 2591088
A_33_P3685237	A1BG	0.294854	P	403937	475845		NM_130786	NM_130786	NM_130786	A1BG	chr19:058858293-058858255	GO:0003674(molecular_function)|GO:0005576(extracellular region)|GO:0008150(biological_process)	Hs.529161	ENST00000263100	Homo sapiens alpha-1-B glycoprotein (A1BG), mRNA [NM_130786]	hs|19q13.43	THC2461029	GO:0003674(molecular_function)|GO:0005576(extracellular region)|GO:0008150(biological_process)	alpha-1-B glycoprotein	TCTCTGGGGGGCTGGAGAAGCCTCCCTCATTCCTCCCAGGAATTAATAAATGTGAAGAGA	202280
A_24_P721720	A1BG-AS22	0.289412	A	406683	479079	FLJ23590	NR_015380	NR_015380	NR_015380	A1BG-AS22	chr19:058866199-058866279		Hs.709582		Homo sapiens A1BG antisense RNA 1 (non-protein coding) (A1BG-AS1), non-coding RNA [NR_015380]	hs|19q13.43	NP38065973		A1BG antisense RNA 1 (non-protein coding)	AGGGTGTGCACAGAACTCAGAAGTCAGACCACTGAACAGTGACAGAACCTTTCAGCCCAT	202921					FLI_CDNA; oligo capping; fis (full insert sequence)					12477953
A_23_P104245	A1CF	0.28397	P	409429	482314	ACF; ASP; ACF64; ACF65; MGC163391; RP11-564C4.23	NM_138933	NM_138933	NM_138933	A1CF	chr10:052570857-052570821	GO:0000166(nucleotide binding)|GO:0003676(nucleic acid binding)|GO:0003723(RNA binding)|GO:0003725(double-stranded RNA binding)|GO:0003727(single-stranded RNA binding)|GO:0003729(mRNA binding)|GO:0004131(cytosine deaminase activity)|GO:0005515(protein binding)|GO:0005622(intracellular)|GO:0005634(nucleus)|GO:0005654(nucleoplasm)|GO:0005720(nuclear heterochromatin)|GO:0005737(cytoplasm)|GO:0005783…	Hs.282795	ENST00000395489	Homo sapiens APOBEC1 complementation factor (A1CF), transcript variant 3, mRNA [NM_138933]	hs|10q11.44	NP38999798	GO:0000166(nucleotide binding)|GO:0003725(double-stranded RNA binding)|GO:0003727(single-stranded RNA binding)|GO:0005515(protein binding)|GO:0005634(nucleus)|GO:0005737(cytoplasm)|GO:0005783(endoplasmic reticulum)|GO:0006397(mRNA processing)|GO:0030895(apolipoprotein B mRNA editing enzyme complex)|GO:0050821(protein stabilization)	APOBEC1 complementation factor	GACAGCTATTCTTGTACAAAATAACTATTCCTGCTCTAGCCAGCCAGAATCCTGCAATCC	203561	GO:30895(apolipoprotein B mRNA editing enzyme complex); GO:5737(cytoplasm); GO:5634(nucleus)	GO:3725(double-stranded RNA binding); GO:3676(nucleic acid binding); GO:166(nucleotide binding); GO:5515(protein binding); GO:3727(single-stranded RNA binding)	Mammalian apolipoprotein B mRNA undergoes site-specific C to U deamination, which is mediated by a multi-component enzyme complex containing a minimal core composed of APOBEC-1 and a complementation factor encoded by this gene. The gene product has three non-identical RNA recognition motifs and belongs to the hnRNP R family of RNA-binding proteins. It has been proposed that this complementation f…	GO:6381(mRNA editing); GO:6397(mRNA processing); GO:50821(protein stabilization)			apobec-1 complementation factor isoform 24			16055734; 15164054; 15148397; 14702039; 12896982; 12881431; 12477932; 11871661; 11815617; 11752456; 11718896; 11577082; 11571303; 11352648; 11329013; 11134005; 11072063; 10833526; 10781591; 10669780
A_32_P110893	A2LD22	0.278528	P	412175	485549	LOC87790	NM_033110	NM_033110	NM_033110	A2LD22	chr13:101183916-101183878	GO:0003839(gamma-glutamylcyclotransferase activity)|GO:0016746(transferase activity, transferring acyl groups)|GO:0042219(cellular modified amino acid catabolic process)	Hs.350868	ENST00000455100	Homo sapiens AIG2-like domain 1 (A2LD1), transcript variant 1, mRNA [NM_033110]	hs|13q32.24	THC2610211		AIG2-like domain 22	GCTGTATATCAGAGTGCGTATAGCACCATTCTTCCTAATTTTCAGATCAAGCTTCACAGC	204202		GO:0005554(molecular function unknown)					LOC87769 protein			14702039; 12477953
A_23_P116919	A2M	0.273086	P	414921	488783	CPAMD5; FWP007; S863-7; alpha 2M; DKFZp779B107	NM_000014	NM_000014	NM_000014	A2M	chr12:009221418-009221380	GO:0001869(negative regulation of complement activation, lectin pathway)|GO:0002576(platelet degranulation)|GO:0004867(serine-type endopeptidase inhibitor activity)|GO:0005515(protein binding)|GO:0005576(extracellular region)|GO:0005615(extracellular space)|GO:0005829(cytosol)|GO:0007264(small GTPase mediated signal transduction)|GO:0007596(blood coagulation)|GO:0007597(blood coagulation, intrins…	Hs.212838	ENST00000540099	Homo sapiens alpha-2-macroglobulin (A2M), mRNA [NM_000014]	hs|12p13.31	NP1282500	GO:0001869(negative regulation of complement activation, lectin pathway)|GO:0004867(serine-type endopeptidase inhibitor activity)|GO:0005576(extracellular region)|GO:0005615(extracellular space)|GO:0006953(acute-phase response)|GO:0007584(response to nutrient)|GO:0010037(response to carbon dioxide)|GO:0019899(enzyme binding)|GO:0019959(interleukin-8 binding)|GO:0019966(interleukin-1 binding)|GO:0…	alpha-2-macroglobulin	CTTGTTCTTCACGGTTCTGCAAGATGTCCCAGTAAGAGATCTGAAACCAGCCATAGTGAA	204842	GO:5576(extracellular region)	GO:19899(enzyme binding); GO:19966(interleukin-1 binding); GO:19959(interleukin-8 binding); GO:8320(protein carrier activity); GO:4867(serine-type endopeptidase inhibitor activity); GO:43120(tumor necrosis factor binding); GO:17114(wide-spectrum protease inhibitor activity)	Alpha-2-macroglobulin is a protease inhibitor and cytokine transporter. It inhibits many proteases, including trypsin, thrombin and collagenase. A2M is implicated in Alzheimer disease (AD) due to its ability to mediate the clearance and degradation of A-beta, the major component of beta-amyloid deposits.	GO:6886(intracellular protein transport); GO:51260(protein homooligomerization)			alpha-2-macroglobulin precursor	Alzheimer disease, susceptibility to; Emphysema due to alpha-2-macroglobulin deficiency	KEGG pathway: Alzheimer's disease 05010; KEGG pathway: Complement and coagulation cascades 04610; Reactome Event:Hemostasis 109603	17071617; 16910174; 16784755; 16641085; 16407218; 16335952; 16297527; 16232083; 15931081; 15910735; 15908432; 15611997; 15511627; 15489334; 15023809; 14760718; 14718574; 14715656; 14678766; 14675603; 14637088; 14506912; 12966032; 12755687; 12755614; 12754519; 12631277; 12477932; 12221172; 12194978; 12175343; 12062545; 12042276; 12015318; 11916201; 11910179; 11901360; 11823454; 11811950; 11435418;…
A_33_P3525284	A2ML22	0.267644	A	417666	492018		NM_144670	NM_144670	NM_144670	A2ML22	chr12:009027061-009027141	GO:0004867(serine-type endopeptidase inhibitor activity)|GO:0005576(extracellular region)|GO:0005615(extracellular space)|GO:0010466(negative regulation of peptidase activity)|GO:0030414(peptidase inhibitor activity)|GO:0052548(regulation of endopeptidase activity)	Hs.620532	ENST00000541459	Homo sapiens alpha-2-macroglobulin-like 1 (A2ML1), mRNA [NM_144670]	hs|12p13.31	NP1285419	GO:0004867(serine-type endopeptidase inhibitor activity)|GO:0005515(protein binding)|GO:0005576(extracellular region)|GO:0005615(extracellular space)|GO:0052548(regulation of endopeptidase activity)	alpha-2-macroglobulin-like 22	AAAGTGTGCTGGTCACCAACTTGAAACCAGCAACCATCAAGGTCTATGACTACTACCTAC	205483
A_24_P151143	A1BG	0.262202	A	420412	495253	A1B; ABG; GAB; HYST2477; DKFZp686F0992				A1BG	chr19:058857206-058857169	GO:0003674(molecular_function)|GO:0005576(extracellular region)|GO:0008150(biological_process)	Hs.529161		Homo sapiens cDNA FLJ31639 fis, clone NT2RI2003655, weakly similar to ZINC FINGER PROTEIN 195. [AK056201]	hs|19q13.43	THC2461029		alpha-1-B glycoprotein	GCTAGTGATCTGGTTTACTGCCTTAGTAATATCTAGTTCCTAATATGCCTATGCCTTTTA	206123	GO:5576(extracellular region)	GO:3674(molecular_function)	The protein encoded by this gene is a plasma glycoprotein of unknown function. The protein shows sequence similarity to the variable regions of some immunoglobulin supergene family member proteins.	GO:8150(biological_process)			alpha 1B-glycoprotein			16335952; 15489334; 15461460; 15221005; 14760718; 14702039; 12477932; 8889549; 3610142; 3458201; 2591089
A_33_P3685238	A1BG	0.256761	P	423158	498487		NM_130786	NM_130786	NM_130786	A1BG	chr19:058858293-058858256	GO:0003674(molecular_function)|GO:0005576(extracellular region)|GO:0008150(biological_process)	Hs.529161	ENST00000263100	Homo sapiens alpha-1-B glycoprotein (A1BG), mRNA [NM_130786]	hs|19q13.43	THC2461029	GO:0003674(molecular_function)|GO:0005576(extracellular region)|GO:0008150(biological_process)	alpha-1-B glycoprotein	TCTCTGGGGGGCTGGAGAAGCCTCCCTCATTCCTCCCAGGAATTAATAAATGTGAAGAGA	206764
A_24_P721721	A1BG-AS23	0.251319	A	425904	501722	FLJ23591	NR_015380	NR_015380	NR_015380	A1BG-AS23	chr19:058866199-058866280		Hs.709582		Homo sapiens A1BG antisense RNA 1 (non-protein coding) (A1BG-AS1), non-coding RNA [NR_015380]	hs|19q13.43	NP39933623		A1BG antisense RNA 1 (non-protein coding)	AGGGTGTGCACAGAACTCAGAAGTCAGACCACTGAACAGTGACAGAACCTTTCAGCCCAT	207404					FLI_CDNA; oligo capping; fis (full insert sequence)					12477954
A_23_P104246	A1CF	0.245877	P	428650	504957	ACF; ASP; ACF64; ACF65; MGC163391; RP11-564C4.24	NM_138933	NM_138933	NM_138933	A1CF	chr10:052570857-052570822	GO:0000166(nucleotide binding)|GO:0003676(nucleic acid binding)|GO:0003723(RNA binding)|GO:0003725(double-stranded RNA binding)|GO:0003727(single-stranded RNA binding)|GO:0003729(mRNA binding)|GO:0004131(cytosine deaminase activity)|GO:0005515(protein binding)|GO:0005622(intracellular)|GO:0005634(nucleus)|GO:0005654(nucleoplasm)|GO:0005720(nuclear heterochromatin)|GO:0005737(cytoplasm)|GO:0005783…	Hs.282795	ENST00000395489	Homo sapiens APOBEC1 complementation factor (A1CF), transcript variant 3, mRNA [NM_138933]	hs|10q11.45	NP40867448	GO:0000166(nucleotide binding)|GO:0003725(double-stranded RNA binding)|GO:0003727(single-stranded RNA binding)|GO:0005515(protein binding)|GO:0005634(nucleus)|GO:0005737(cytoplasm)|GO:0005783(endoplasmic reticulum)|GO:0006397(mRNA processing)|GO:0030895(apolipoprotein B mRNA editing enzyme complex)|GO:0050821(protein stabilization)	APOBEC1 complementation factor	GACAGCTATTCTTGTACAAAATAACTATTCCTGCTCTAGCCAGCCAGAATCCTGCAATCC	208045	GO:30895(apolipoprotein B mRNA editing enzyme complex); GO:5737(cytoplasm); GO:5634(nucleus)	GO:3725(double-stranded RNA binding); GO:3676(nucleic acid binding); GO:166(nucleotide binding); GO:5515(protein binding); GO:3727(single-stranded RNA binding)	Mammalian apolipoprotein B mRNA undergoes site-specific C to U deamination, which is mediated by a multi-component enzyme complex containing a minimal core composed of APOBEC-1 and a complementation factor encoded by this gene. The gene product has three non-identical RNA recognition motifs and belongs to the hnRNP R family of RNA-binding proteins. It has been proposed that this complementation f…	GO:6381(mRNA editing); GO:6397(mRNA processing); GO:50821(protein stabilization)			apobec-1 complementation factor isoform 25			16055734; 15164054; 15148397; 14702039; 12896982; 12881431; 12477932; 11871661; 11815617; 11752456; 11718896; 11577082; 11571303; 11352648; 11329013; 11134005; 11072063; 10833526; 10781591; 10669781
A_32_P110894	A2LD23	0.240435	P	431396	508191	LOC87791	NM_033110	NM_033110	NM_033110	A2LD23	chr13:101183916-101183879	GO:0003839(gamma-glutamylcyclotransferase activity)|GO:0016746(transferase activity, transferring acyl groups)|GO:0042219(cellular modified amino acid catabolic process)	Hs.350868	ENST00000455100	Homo sapiens AIG2-like domain 1 (A2LD1), transcript variant 1, mRNA [NM_033110]	hs|13q32.25	THC2610212		AIG2-like domain 23	GCTGTATATCAGAGTGCGTATAGCACCATTCTTCCTAATTTTCAGATCAAGCTTCACAGC	208685		GO:0005554(molecular function unknown)					LOC87769 protein			14702039; 12477954
A_23_P116920	A2M	0.234993	P	434142	511426	CPAMD5; FWP007; S863-7; alpha 2M; DKFZp779B108	NM_000014	NM_000014	NM_000014	A2M	chr12:009221418-009221381	GO:0001869(negative regulation of complement activation, lectin pathway)|GO:0002576(platelet degranulation)|GO:0004867(serine-type endopeptidase inhibitor activity)|GO:0005515(protein binding)|GO:0005576(extracellular region)|GO:0005615(extracellular space)|GO:0005829(cytosol)|GO:0007264(small GTPase mediated signal transduction)|GO:0007596(blood coagulation)|GO:0007597(blood coagulation, intrins…	Hs.212838	ENST00000540099	Homo sapiens alpha-2-macroglobulin (A2M), mRNA [NM_000014]	hs|12p13.31	NP1288338	GO:0001869(negative regulation of complement activation, lectin pathway)|GO:0004867(serine-type endopeptidase inhibitor activity)|GO:0005576(extracellular region)|GO:0005615(extracellular space)|GO:0006953(acute-phase response)|GO:0007584(response to nutrient)|GO:0010037(response to carbon dioxide)|GO:0019899(enzyme binding)|GO:0019959(interleukin-8 binding)|GO:0019966(interleukin-1 binding)|GO:0…	alpha-2-macroglobulin	CTTGTTCTTCACGGTTCTGCAAGATGTCCCAGTAAGAGATCTGAAACCAGCCATAGTGAA	209326	GO:5576(extracellular region)	GO:19899(enzyme binding); GO:19966(interleukin-1 binding); GO:19959(interleukin-8 binding); GO:8320(protein carrier activity); GO:4867(serine-type endopeptidase inhibitor activity); GO:43120(tumor necrosis factor binding); GO:17114(wide-spectrum protease inhibitor activity)	Alpha-2-macroglobulin is a protease inhibitor and cytokine transporter. It inhibits many proteases, including trypsin, thrombin and collagenase. A2M is implicated in Alzheimer disease (AD) due to its ability to mediate the clearance and degradation of A-beta, the major component of beta-amyloid deposits.	GO:6886(intracellular protein transport); GO:51260(protein homooligomerization)			alpha-2-macroglobulin precursor	Alzheimer disease, susceptibility to; Emphysema due to alpha-2-macroglobulin deficiency	KEGG pathway: Alzheimer's disease 05010; KEGG pathway: Complement and coagulation cascades 04610; Reactome Event:Hemostasis 109604	17071617; 16910174; 16784755; 16641085; 16407218; 16335952; 16297527; 16232083; 15931081; 15910735; 15908432; 15611997; 15511627; 15489334; 15023809; 14760718; 14718574; 14715656; 14678766; 14675603; 14637088; 14506912; 12966032; 12755687; 12755614; 12754519; 12631277; 12477932; 12221172; 12194978; 12175343; 12062545; 12042276; 12015318; 11916201; 11910179; 11901360; 11823454; 11811950; 11435418;…
A_33_P3525285	A2ML23	0.229551	A	436888	514661		NM_144670	NM_144670	NM_144670	A2ML23	chr12:009027061-009027142	GO:0004867(serine-type endopeptidase inhibitor activity)|GO:0005576(extracellular region)|GO:0005615(extracellular space)|GO:0010466(negative regulation of peptidase activity)|GO:0030414(peptidase inhibitor activity)|GO:0052548(regulation of endopeptidase activity)	Hs.620532	ENST00000541459	Homo sapiens alpha-2-macroglobulin-like 1 (A2ML1), mRNA [NM_144670]	hs|12p13.31	NP1291257	GO:0004867(serine-type endopeptidase inhibitor activity)|GO:0005515(protein binding)|GO:0005576(extracellular region)|GO:0005615(extracellular space)|GO:0052548(regulation of endopeptidase activity)	alpha-2-macroglobulin-like 23	AAAGTGTGCTGGTCACCAACTTGAAACCAGCAACCATCAAGGTCTATGACTACTACCTAC	209966
A_24_P151144	A1BG	0.224109	A	439634	517895	A1B; ABG; GAB; HYST2477; DKFZp686F0993				A1BG	chr19:058857206-058857170	GO:0003674(molecular_function)|GO:0005576(extracellular region)|GO:0008150(biological_process)	Hs.529161		Homo sapiens cDNA FLJ31639 fis, clone NT2RI2003655, weakly similar to ZINC FINGER PROTEIN 195. [AK056201]	hs|19q13.43	THC2461029		alpha-1-B glycoprotein	GCTAGTGATCTGGTTTACTGCCTTAGTAATATCTAGTTCCTAATATGCCTATGCCTTTTA	210607	GO:5576(extracellular region)	GO:3674(molecular_function)	The protein encoded by this gene is a plasma glycoprotein of unknown function. The protein shows sequence similarity to the variable regions of some immunoglobulin supergene family member proteins.	GO:8150(biological_process)			alpha 1B-glycoprotein			16335952; 15489334; 15461460; 15221005; 14760718; 14702039; 12477932; 8889549; 3610142; 3458201; 2591090
A_33_P3685239	A1BG	0.218667	P	442380	521130		NM_130786	NM_130786	NM_130786	A1BG	chr19:058858293-058858257	GO:0003674(molecular_function)|GO:0005576(extracellular region)|GO:0008150(biological_process)	Hs.529161	ENST00000263100	Homo sapiens alpha-1-B glycoprotein (A1BG), mRNA [NM_130786]	hs|19q13.43	THC2461029	GO:0003674(molecular_function)|GO:0005576(extracellular region)|GO:0008150(biological_process)	alpha-1-B glycoprotein	TCTCTGGGGGGCTGGAGAAGCCTCCCTCATTCCTCCCAGGAATTAATAAATGTGAAGAGA	211247
A_24_P721722	A1BG-AS24	0.213226	A	445126	524365	FLJ23592	NR_015380	NR_015380	NR_015380	A1BG-AS24	chr19:058866199-058866281		Hs.709582		Homo sapiens A1BG antisense RNA 1 (non-protein coding) (A1BG-AS1), non-coding RNA [NR_015380]	hs|19q13.43	NP41801273		A1BG antisense RNA 1 (non-protein coding)	AGGGTGTGCACAGAACTCAGAAGTCAGACCACTGAACAGTGACAGAACCTTTCAGCCCAT	211888					FLI_CDNA; oligo capping; fis (full insert sequence)					12477955
A_23_P104247	A1CF	0.207784	P	447872	527599	ACF; ASP; ACF64; ACF65; MGC163391; RP11-564C4.25	NM_138933	NM_138933	NM_138933	A1CF	chr10:052570857-052570823	GO:0000166(nucleotide binding)|GO:0003676(nucleic acid binding)|GO:0003723(RNA binding)|GO:0003725(double-stranded RNA binding)|GO:0003727(single-stranded RNA binding)|GO:0003729(mRNA binding)|GO:0004131(cytosine deaminase activity)|GO:0005515(protein binding)|GO:0005622(intracellular)|GO:0005634(nucleus)|GO:0005654(nucleoplasm)|GO:0005720(nuclear heterochromatin)|GO:0005737(cytoplasm)|GO:0005783…	Hs.282795	ENST00000395489	Homo sapiens APOBEC1 complementation factor (A1CF), transcript variant 3, mRNA [NM_138933]	hs|10q11.46	NP42735098	GO:0000166(nucleotide binding)|GO:0003725(double-stranded RNA binding)|GO:0003727(single-stranded RNA binding)|GO:0005515(protein binding)|GO:0005634(nucleus)|GO:0005737(cytoplasm)|GO:0005783(endoplasmic reticulum)|GO:0006397(mRNA processing)|GO:0030895(apolipoprotein B mRNA editing enzyme complex)|GO:0050821(protein stabilization)	APOBEC1 complementation factor	GACAGCTATTCTTGTACAAAATAACTATTCCTGCTCTAGCCAGCCAGAATCCTGCAATCC	212528	GO:30895(apolipoprotein B mRNA editing enzyme complex); GO:5737(cytoplasm); GO:5634(nucleus)	GO:3725(double-stranded RNA binding); GO:3676(nucleic acid binding); GO:166(nucleotide binding); GO:5515(protein binding); GO:3727(single-stranded RNA binding)	Mammalian apolipoprotein B mRNA undergoes site-specific C to U deamination, which is mediated by a multi-component enzyme complex containing a minimal core composed of APOBEC-1 and a complementation factor encoded by this gene. The gene product has three non-identical RNA recognition motifs and belongs to the hnRNP R family of RNA-binding proteins. It has been proposed that this complementation f…	GO:6381(mRNA editing); GO:6397(mRNA processing); GO:50821(protein stabilization)			apobec-1 complementation factor isoform 26			16055734; 15164054; 15148397; 14702039; 12896982; 12881431; 12477932; 11871661; 11815617; 11752456; 11718896; 11577082; 11571303; 11352648; 11329013; 11134005; 11072063; 10833526; 10781591; 10669782
A_32_P110895	A2LD24	0.202342	P	450618	530834	LOC87792	NM_033110	NM_033110	NM_033110	A2LD24	chr13:101183916-101183880	GO:0003839(gamma-glutamylcyclotransferase activity)|GO:0016746(transferase activity, transferring acyl groups)|GO:0042219(cellular modified amino acid catabolic process)	Hs.350868	ENST00000455100	Homo sapiens AIG2-like domain 1 (A2LD1), transcript variant 1, mRNA [NM_033110]	hs|13q32.26	THC2610213		AIG2-like domain 24	GCTGTATATCAGAGTGCGTATAGCACCATTCTTCCTAATTTTCAGATCAAGCTTCACAGC	213169		GO:0005554(molecular function unknown)					LOC87769 protein			14702039; 12477955
A_23_P116921	A2M	0.1969	P	453364	534068	CPAMD5; FWP007; S863-7; alpha 2M; DKFZp779B109	NM_000014	NM_000014	NM_000014	A2M	chr12:009221418-009221382	GO:0001869(negative regulation of complement activation, lectin pathway)|GO:0002576(platelet degranulation)|GO:0004867(serine-type endopeptidase inhibitor activity)|GO:0005515(protein binding)|GO:0005576(extracellular region)|GO:0005615(extracellular space)|GO:0005829(cytosol)|GO:0007264(small GTPase mediated signal transduction)|GO:0007596(blood coagulation)|GO:0007597(blood coagulation, intrins…	Hs.212838	ENST00000540099	Homo sapiens alpha-2-macroglobulin (A2M), mRNA [NM_000014]	hs|12p13.31	NP1294176	GO:0001869(negative regulation of complement activation, lectin pathway)|GO:0004867(serine-type endopeptidase inhibitor activity)|GO:0005576(extracellular region)|GO:0005615(extracellular space)|GO:0006953(acute-phase response)|GO:0007584(response to nutrient)|GO:0010037(response to carbon dioxide)|GO:0019899(enzyme binding)|GO:0019959(interleukin-8 binding)|GO:0019966(interleukin-1 binding)|GO:0…	alpha-2-macroglobulin	CTTGTTCTTCACGGTTCTGCAAGATGTCCCAGTAAGAGATCTGAAACCAGCCATAGTGAA	213809	GO:5576(extracellular region)	GO:19899(enzyme binding); GO:19966(interleukin-1 binding); GO:19959(interleukin-8 binding); GO:8320(protein carrier activity); GO:4867(serine-type endopeptidase inhibitor activity); GO:43120(tumor necrosis factor binding); GO:17114(wide-spectrum protease inhibitor activity)	Alpha-2-macroglobulin is a protease inhibitor and cytokine transporter. It inhibits many proteases, including trypsin, thrombin and collagenase. A2M is implicated in Alzheimer disease (AD) due to its ability to mediate the clearance and degradation of A-beta, the major component of beta-amyloid deposits.	GO:6886(intracellular protein transport); GO:51260(protein homooligomerization)			alpha-2-macroglobulin precursor	Alzheimer disease, susceptibility to; Emphysema due to alpha-2-macroglobulin deficiency	KEGG pathway: Alzheimer's disease 05010; KEGG pathway: Complement and coagulation cascades 04610; Reactome Event:Hemostasis 109605	17071617; 16910174; 16784755; 16641085; 16407218; 16335952; 16297527; 16232083; 15931081; 15910735; 15908432; 15611997; 15511627; 15489334; 15023809; 14760718; 14718574; 14715656; 14678766; 14675603; 14637088; 14506912; 12966032; 12755687; 12755614; 12754519; 12631277; 12477932; 12221172; 12194978; 12175343; 12062545; 12042276; 12015318; 11916201; 11910179; 11901360; 11823454; 11811950; 11435418;…
A_33_P3525286	A2ML24	0.191458	A	456110	537303		NM_144670	NM_144670	NM_144670	A2ML24	chr12:009027061-009027143	GO:0004867(serine-type endopeptidase inhibitor activity)|GO:0005576(extracellular region)|GO:0005615(extracellular space)|GO:0010466(negative regulation of peptidase activity)|GO:0030414(peptidase inhibitor activity)|GO:0052548(regulation of endopeptidase activity)	Hs.620532	ENST00000541459	Homo sapiens alpha-2-macroglobulin-like 1 (A2ML1), mRNA [NM_144670]	hs|12p13.31	NP1297095	GO:0004867(serine-type endopeptidase inhibitor activity)|GO:0005515(protein binding)|GO:0005576(extracellular region)|GO:0005615(extracellular space)|GO:0052548(regulation of endopeptidase activity)	alpha-2-macroglobulin-like 24	AAAGTGTGCTGGTCACCAACTTGAAACCAGCAACCATCAAGGTCTATGACTACTACCTAC	214450
A_24_P151145	A1BG	0.186016	A	458856	540538	A1B; ABG; GAB; HYST2477; DKFZp686F0994				A1BG	chr19:058857206-058857171	GO:0003674(molecular_function)|GO:0005576(extracellular region)|GO:0008150(biological_process)	Hs.529161		Homo sapiens cDNA FLJ31639 fis, clone NT2RI2003655, weakly similar to ZINC FINGER PROTEIN 195. [AK056201]	hs|19q13.43	THC2461029		alpha-1-B glycoprotein	GCTAGTGATCTGGTTTACTGCCTTAGTAATATCTAGTTCCTAATATGCCTATGCCTTTTA	215090	GO:5576(extracellular region)	GO:3674(molecular_function)	The protein encoded by this gene is a plasma glycoprotein of unknown function. The protein shows sequence similarity to the variable regions of some immunoglobulin supergene family member proteins.	GO:8150(biological_process)			alpha 1B-glycoprotein			16335952; 15489334; 15461460; 15221005; 14760718; 14702039; 12477932; 8889549; 3610142; 3458201; 2591091
A_33_P3685240	A1BG	0.180574	P	461601	543772		NM_130786	NM_130786	NM_130786	A1BG	chr19:058858293-058858258	GO:0003674(molecular_function)|GO:0005576(extracellular region)|GO:0008150(biological_process)	Hs.529161	ENST00000263100	Homo sapiens alpha-1-B glycoprotein (A1BG), mRNA [NM_130786]	hs|19q13.43	THC2461029	GO:0003674(molecular_function)|GO:0005576(extracellular region)|GO:0008150(biological_process)	alpha-1-B glycoprotein	TCTCTGGGGGGCTGGAGAAGCCTCCCTCATTCCTCCCAGGAATTAATAAATGTGAAGAGA	215731
A_24_P721723	A1BG-AS25	0.175132	A	464347	547007	FLJ23593	NR_015380	NR_015380	NR_015380	A1BG-AS25	chr19:058866199-058866282		Hs.709582		Homo sapiens A1BG antisense RNA 1 (non-protein coding) (A1BG-AS1), non-coding RNA [NR_015380]	hs|19q13.43	NP43668923		A1BG antisense RNA 1 (non-protein coding)	AGGGTGTGCACAGAACTCAGAAGTCAGACCACTGAACAGTGACAGAACCTTTCAGCCCAT	216371					FLI_CDNA; oligo capping; fis (full insert sequence)					12477956
A_23_P104248	A1CF	0.169691	P	467093	550242	ACF; ASP; ACF64; ACF65; MGC163391; RP11-564C4.26	NM_138933	NM_138933	NM_138933	A1CF	chr10:052570857-052570824	GO:0000166(nucleotide binding)|GO:0003676(nucleic acid binding)|GO:0003723(RNA binding)|GO:0003725(double-stranded RNA binding)|GO:0003727(single-stranded RNA binding)|GO:0003729(mRNA binding)|GO:0004131(cytosine deaminase activity)|GO:0005515(protein binding)|GO:0005622(intracellular)|GO:0005634(nucleus)|GO:0005654(nucleoplasm)|GO:0005720(nuclear heterochromatin)|GO:0005737(cytoplasm)|GO:0005783…	Hs.282795	ENST00000395489	Homo sapiens APOBEC1 complementation factor (A1CF), transcript variant 3, mRNA [NM_138933]	hs|10q11.47	NP44602748	GO:0000166(nucleotide binding)|GO:0003725(double-stranded RNA binding)|GO:0003727(single-stranded RNA binding)|GO:0005515(protein binding)|GO:0005634(nucleus)|GO:0005737(cytoplasm)|GO:0005783(endoplasmic reticulum)|GO:0006397(mRNA processing)|GO:0030895(apolipoprotein B mRNA editing enzyme complex)|GO:0050821(protein stabilization)	APOBEC1 complementation factor	GACAGCTATTCTTGTACAAAATAACTATTCCTGCTCTAGCCAGCCAGAATCCTGCAATCC	217012	GO:30895(apolipoprotein B mRNA editing enzyme complex); GO:5737(cytoplasm); GO:5634(nucleus)	GO:3725(double-stranded RNA binding); GO:3676(nucleic acid binding); GO:166(nucleotide binding); GO:5515(protein binding); GO:3727(single-stranded RNA binding)	Mammalian apolipoprotein B mRNA undergoes site-specific C to U deamination, which is mediated by a multi-component enzyme complex containing a minimal core composed of APOBEC-1 and a complementation factor encoded by this gene. The gene product has three non-identical RNA recognition motifs and belongs to the hnRNP R family of RNA-binding proteins. It has been proposed that this complementation f…	GO:6381(mRNA editing); GO:6397(mRNA processing); GO:50821(protein stabilization)			apobec-1 complementation factor isoform 27			16055734; 15164054; 15148397; 14702039; 12896982; 12881431; 12477932; 11871661; 11815617; 11752456; 11718896; 11577082; 11571303; 11352648; 11329013; 11134005; 11072063; 10833526; 10781591; 10669783
A_32_P110896	A2LD25	0.164249	P	469839	553476	LOC87793	NM_033110	NM_033110	NM_033110	A2LD25	chr13:101183916-101183881	GO:0003839(gamma-glutamylcyclotransferase activity)|GO:0016746(transferase activity, transferring acyl groups)|GO:0042219(cellular modified amino acid catabolic process)	Hs.350868	ENST00000455100	Homo sapiens AIG2-like domain 1 (A2LD1), transcript variant 1, mRNA [NM_033110]	hs|13q32.27	THC2610214		AIG2-like domain 25	GCTGTATATCAGAGTGCGTATAGCACCATTCTTCCTAATTTTCAGATCAAGCTTCACAGC	217652		GO:0005554(molecular function unknown)					LOC87769 protein			14702039; 12477956
A_23_P116922	A2M	0.158807	P	472585	556711	CPAMD5; FWP007; S863-7; alpha 2M; DKFZp779B110	NM_000014	NM_000014	NM_000014	A2M	chr12:009221418-009221383	GO:0001869(negative regulation of complement activation, lectin pathway)|GO:0002576(platelet degranulation)|GO:0004867(serine-type endopeptidase inhibitor activity)|GO:0005515(protein binding)|GO:0005576(extracellular region)|GO:0005615(extracellular space)|GO:0005829(cytosol)|GO:0007264(small GTPase mediated signal transduction)|GO:0007596(blood coagulation)|GO:0007597(blood coagulation, intrins…	Hs.212838	ENST00000540099	Homo sapiens alpha-2-macroglobulin (A2M), mRNA [NM_000014]	hs|12p13.31	NP1300014	GO:0001869(negative regulation of complement activation, lectin pathway)|GO:0004867(serine-type endopeptidase inhibitor activity)|GO:0005576(extracellular region)|GO:0005615(extracellular space)|GO:0006953(acute-phase response)|GO:0007584(response to nutrient)|GO:0010037(response to carbon dioxide)|GO:0019899(enzyme binding)|GO:0019959(interleukin-8 binding)|GO:0019966(interleukin-1 binding)|GO:0…	alpha-2-macroglobulin	CTTGTTCTTCACGGTTCTGCAAGATGTCCCAGTAAGAGATCTGAAACCAGCCATAGTGAA	218293	GO:5576(extracellular region)	GO:19899(enzyme binding); GO:19966(interleukin-1 binding); GO:19959(interleukin-8 binding); GO:8320(protein carrier activity); GO:4867(serine-type endopeptidase inhibitor activity); GO:43120(tumor necrosis factor binding); GO:17114(wide-spectrum protease inhibitor activity)	Alpha-2-macroglobulin is a protease inhibitor and cytokine transporter. It inhibits many proteases, including trypsin, thrombin and collagenase. A2M is implicated in Alzheimer disease (AD) due to its ability to mediate the clearance and degradation of A-beta, the major component of beta-amyloid deposits.	GO:6886(intracellular protein transport); GO:51260(protein homooligomerization)			alpha-2-macroglobulin precursor	Alzheimer disease, susceptibility to; Emphysema due to alpha-2-macroglobulin deficiency	KEGG pathway: Alzheimer's disease 05010; KEGG pathway: Complement and coagulation cascades 04610; Reactome Event:Hemostasis 109606	17071617; 16910174; 16784755; 16641085; 16407218; 16335952; 16297527; 16232083; 15931081; 15910735; 15908432; 15611997; 15511627; 15489334; 15023809; 14760718; 14718574; 14715656; 14678766; 14675603; 14637088; 14506912; 12966032; 12755687; 12755614; 12754519; 12631277; 12477932; 12221172; 12194978; 12175343; 12062545; 12042276; 12015318; 11916201; 11910179; 11901360; 11823454; 11811950; 11435418;…
A_33_P3525287	A2ML25	0.153365	A	475331	559946		NM_144670	NM_144670	NM_144670	A2ML25	chr12:009027061-009027144	GO:0004867(serine-type endopeptidase inhibitor activity)|GO:0005576(extracellular region)|GO:0005615(extracellular space)|GO:0010466(negative regulation of peptidase activity)|GO:0030414(peptidase inhibitor activity)|GO:0052548(regulation of endopeptidase activity)	Hs.620532	ENST00000541459	Homo sapiens alpha-2-macroglobulin-like 1 (A2ML1), mRNA [NM_144670]	hs|12p13.31	NP1302933	GO:0004867(serine-type endopeptidase inhibitor activity)|GO:0005515(protein binding)|GO:0005576(extracellular region)|GO:0005615(extracellular space)|GO:0052548(regulation of endopeptidase activity)	alpha-2-macroglobulin-like 25	AAAGTGTGCTGGTCACCAACTTGAAACCAGCAACCATCAAGGTCTATGACTACTACCTAC	218933
A_24_P151146	A1BG	0.147923	A	478077	563180	A1B; ABG; GAB; HYST2477; DKFZp686F0995				A1BG	chr19:058857206-058857172	GO:0003674(molecular_function)|GO:0005576(extracellular region)|GO:0008150(biological_process)	Hs.529161		Homo sapiens cDNA FLJ31639 fis, clone NT2RI2003655, weakly similar to ZINC FINGER PROTEIN 195. [AK056201]	hs|19q13.43	THC2461029		alpha-1-B glycoprotein	GCTAGTGATCTGGTTTACTGCCTTAGTAATATCTAGTTCCTAATATGCCTATGCCTTTTA	219574	GO:5576(extracellular region)	GO:3674(molecular_function)	The protein encoded by this gene is a plasma glycoprotein of unknown function. The protein shows sequence similarity to the variable regions of some immunoglobulin supergene family member proteins.	GO:8150(biological_process)			alpha 1B-glycoprotein			16335952; 15489334; 15461460; 15221005; 14760718; 14702039; 12477932; 8889549; 3610142; 3458201; 2591092
A_33_P3685241	A1BG	0.142481	P	480823	566415		NM_130786	NM_130786	NM_130786	A1BG	chr19:058858293-058858259	GO:0003674(molecular_function)|GO:0005576(extracellular region)|GO:0008150(biological_process)	Hs.529161	ENST00000263100	Homo sapiens alpha-1-B glycoprotein (A1BG), mRNA [NM_130786]	hs|19q13.43	THC2461029	GO:0003674(molecular_function)|GO:0005576(extracellular region)|GO:0008150(biological_process)	alpha-1-B glycoprotein	TCTCTGGGGGGCTGGAGAAGCCTCCCTCATTCCTCCCAGGAATTAATAAATGTGAAGAGA	220214
A_24_P721724	A1BG-AS26	0.137039	A	483569	569650	FLJ23594	NR_015380	NR_015380	NR_015380	A1BG-AS26	chr19:058866199-058866283		Hs.709582		Homo sapiens A1BG antisense RNA 1 (non-protein coding) (A1BG-AS1), non-coding RNA [NR_015380]	hs|19q13.43	NP45536573		A1BG antisense RNA 1 (non-protein coding)	AGGGTGTGCACAGAACTCAGAAGTCAGACCACTGAACAGTGACAGAACCTTTCAGCCCAT	220855					FLI_CDNA; oligo capping; fis (full insert sequence)					12477957
A_23_P104249	A1CF	0.131597	P	486315	572884	ACF; ASP; ACF64; ACF65; MGC163391; RP11-564C4.27	NM_138933	NM_138933	NM_138933	A1CF	chr10:052570857-052570825	GO:0000166(nucleotide binding)|GO:0003676(nucleic acid binding)|GO:0003723(RNA binding)|GO:0003725(double-stranded RNA binding)|GO:0003727(single-stranded RNA binding)|GO:0003729(mRNA binding)|GO:0004131(cytosine deaminase activity)|GO:0005515(protein binding)|GO:0005622(intracellular)|GO:0005634(nucleus)|GO:0005654(nucleoplasm)|GO:0005720(nuclear heterochromatin)|GO:0005737(cytoplasm)|GO:0005783…	Hs.282795	ENST00000395489	Homo sapiens APOBEC1 complementation factor (A1CF), transcript variant 3, mRNA [NM_138933]	hs|10q11.48	NP46470398	GO:0000166(nucleotide binding)|GO:0003725(double-stranded RNA binding)|GO:0003727(single-stranded RNA binding)|GO:0005515(protein binding)|GO:0005634(nucleus)|GO:0005737(cytoplasm)|GO:0005783(endoplasmic reticulum)|GO:0006397(mRNA processing)|GO:0030895(apolipoprotein B mRNA editing enzyme complex)|GO:0050821(protein stabilization)	APOBEC1 complementation factor	GACAGCTATTCTTGTACAAAATAACTATTCCTGCTCTAGCCAGCCAGAATCCTGCAATCC	221495	GO:30895(apolipoprotein B mRNA editing enzyme complex); GO:5737(cytoplasm); GO:5634(nucleus)	GO:3725(double-stranded RNA binding); GO:3676(nucleic acid binding); GO:166(nucleotide binding); GO:5515(protein binding); GO:3727(single-stranded RNA binding)	Mammalian apolipoprotein B mRNA undergoes site-specific C to U deamination, which is mediated by a multi-component enzyme complex containing a minimal core composed of APOBEC-1 and a complementation factor encoded by this gene. The gene product has three non-identical RNA recognition motifs and belongs to the hnRNP R family of RNA-binding proteins. It has been proposed that this complementation f…	GO:6381(mRNA editing); GO:6397(mRNA processing); GO:50821(protein stabilization)			apobec-1 complementation factor isoform 28			16055734; 15164054; 15148397; 14702039; 12896982; 12881431; 12477932; 11871661; 11815617; 11752456; 11718896; 11577082; 11571303; 11352648; 11329013; 11134005; 11072063; 10833526; 10781591; 10669784
A_32_P110897	A2LD26	0.126156	P	489061	576119	LOC87794	NM_033110	NM_033110	NM_033110	A2LD26	chr13:101183916-101183882	GO:0003839(gamma-glutamylcyclotransferase activity)|GO:0016746(transferase activity, transferring acyl groups)|GO:0042219(cellular modified amino acid catabolic process)	Hs.350868	ENST00000455100	Homo sapiens AIG2-like domain 1 (A2LD1), transcript variant 1, mRNA [NM_033110]	hs|13q32.28	THC2610215		AIG2-like domain 26	GCTGTATATCAGAGTGCGTATAGCACCATTCTTCCTAATTTTCAGATCAAGCTTCACAGC	222136		GO:0005554(molecular function unknown)					LOC87769 protein			14702039; 12477957
A_23_P116923	A2M	0.120714	P	491807	579354	CPAMD5; FWP007; S863-7; alpha 2M; DKFZp779B111	NM_000014	NM_000014	NM_000014	A2M	chr12:009221418-009221384	GO:0001869(negative regulation of complement activation, lectin pathway)|GO:0002576(platelet degranulation)|GO:0004867(serine-type endopeptidase inhibitor activity)|GO:0005515(protein binding)|GO:0005576(extracellular region)|GO:0005615(extracellular space)|GO:0005829(cytosol)|GO:0007264(small GTPase mediated signal transduction)|GO:0007596(blood coagulation)|GO:0007597(blood coagulation, intrins…	Hs.212838	ENST00000540099	Homo sapiens alpha-2-macroglobulin (A2M), mRNA [NM_000014]	hs|12p13.31	NP1305852	GO:0001869(negative regulation of complement activation, lectin pathway)|GO:0004867(serine-type endopeptidase inhibitor activity)|GO:0005576(extracellular region)|GO:0005615(extracellular space)|GO:0006953(acute-phase response)|GO:0007584(response to nutrient)|GO:0010037(response to carbon dioxide)|GO:0019899(enzyme binding)|GO:0019959(interleukin-8 binding)|GO:0019966(interleukin-1 binding)|GO:0…	alpha-2-macroglobulin	CTTGTTCTTCACGGTTCTGCAAGATGTCCCAGTAAGAGATCTGAAACCAGCCATAGTGAA	222776	GO:5576(extracellular region)	GO:19899(enzyme binding); GO:19966(interleukin-1 binding); GO:19959(interleukin-8 binding); GO:8320(protein carrier activity); GO:4867(serine-type endopeptidase inhibitor activity); GO:43120(tumor necrosis factor binding); GO:17114(wide-spectrum protease inhibitor activity)	Alpha-2-macroglobulin is a protease inhibitor and cytokine transporter. It inhibits many proteases, including trypsin, thrombin and collagenase. A2M is implicated in Alzheimer disease (AD) due to its ability to mediate the clearance and degradation of A-beta, the major component of beta-amyloid deposits.	GO:6886(intracellular protein transport); GO:51260(protein homooligomerization)			alpha-2-macroglobulin precursor	Alzheimer disease, susceptibility to; Emphysema due to alpha-2-macroglobulin deficiency	KEGG pathway: Alzheimer's disease 05010; KEGG pathway: Complement and coagulation cascades 04610; Reactome Event:Hemostasis 109607	17071617; 16910174; 16784755; 16641085; 16407218; 16335952; 16297527; 16232083; 15931081; 15910735; 15908432; 15611997; 15511627; 15489334; 15023809; 14760718; 14718574; 14715656; 14678766; 14675603; 14637088; 14506912; 12966032; 12755687; 12755614; 12754519; 12631277; 12477932; 12221172; 12194978; 12175343; 12062545; 12042276; 12015318; 11916201; 11910179; 11901360; 11823454; 11811950; 11435418;…
A_33_P3525288	A2ML26	0.115272	A	494553	582588		NM_144670	NM_144670	NM_144670	A2ML26	chr12:009027061-009027145	GO:0004867(serine-type endopeptidase inhibitor activity)|GO:0005576(extracellular region)|GO:0005615(extracellular space)|GO:0010466(negative regulation of peptidase activity)|GO:0030414(peptidase inhibitor activity)|GO:0052548(regulation of endopeptidase activity)	Hs.620532	ENST00000541459	Homo sapiens alpha-2-macroglobulin-like 1 (A2ML1), mRNA [NM_144670]	hs|12p13.31	NP1308771	GO:0004867(serine-type endopeptidase inhibitor activity)|GO:0005515(protein binding)|GO:0005576(extracellular region)|GO:0005615(extracellular space)|GO:0052548(regulation of endopeptidase activity)	alpha-2-macroglobulin-like 26	AAAGTGTGCTGGTCACCAACTTGAAACCAGCAACCATCAAGGTCTATGACTACTACCTAC	223417
A_24_P151147	A1BG	0.10983	A	497299	585823	A1B; ABG; GAB; HYST2477; DKFZp686F0996				A1BG	chr19:058857206-058857173	GO:0003674(molecular_function)|GO:0005576(extracellular region)|GO:0008150(biological_process)	Hs.529161		Homo sapiens cDNA FLJ31639 fis, clone NT2RI2003655, weakly similar to ZINC FINGER PROTEIN 195. [AK056201]	hs|19q13.43	THC2461029		alpha-1-B glycoprotein	GCTAGTGATCTGGTTTACTGCCTTAGTAATATCTAGTTCCTAATATGCCTATGCCTTTTA	224057	GO:5576(extracellular region)	GO:3674(molecular_function)	The protein encoded by this gene is a plasma glycoprotein of unknown function. The protein shows sequence similarity to the variable regions of some immunoglobulin supergene family member proteins.	GO:8150(biological_process)			alpha 1B-glycoprotein			16335952; 15489334; 15461460; 15221005; 14760718; 14702039; 12477932; 8889549; 3610142; 3458201; 2591093
A_33_P3685242	A1BG	0.104388	P	500045	589058		NM_130786	NM_130786	NM_130786	A1BG	chr19:058858293-058858260	GO:0003674(molecular_function)|GO:0005576(extracellular region)|GO:0008150(biological_process)	Hs.529161	ENST00000263100	Homo sapiens alpha-1-B glycoprotein (A1BG), mRNA [NM_130786]	hs|19q13.43	THC2461029	GO:0003674(molecular_function)|GO:0005576(extracellular region)|GO:0008150(biological_process)	alpha-1-B glycoprotein	TCTCTGGGGGGCTGGAGAAGCCTCCCTCATTCCTCCCAGGAATTAATAAATGTGAAGAGA	224698
A_24_P721725	A1BG-AS27	0.0989462	A	502791	592292	FLJ23595	NR_015380	NR_015380	NR_015380	A1BG-AS27	chr19:058866199-058866284		Hs.709582		Homo sapiens A1BG antisense RNA 1 (non-protein coding) (A1BG-AS1), non-coding RNA [NR_015380]	hs|19q13.43	NP47404223		A1BG antisense RNA 1 (non-protein coding)	AGGGTGTGCACAGAACTCAGAAGTCAGACCACTGAACAGTGACAGAACCTTTCAGCCCAT	225338					FLI_CDNA; oligo capping; fis (full insert sequence)					12477958
A_23_P104250	A1CF	0.0935043	P	505536	595527	ACF; ASP; ACF64; ACF65; MGC163391; RP11-564C4.28	NM_138933	NM_138933	NM_138933	A1CF	chr10:052570857-052570826	GO:0000166(nucleotide binding)|GO:0003676(nucleic acid binding)|GO:0003723(RNA binding)|GO:0003725(double-stranded RNA binding)|GO:0003727(single-stranded RNA binding)|GO:0003729(mRNA binding)|GO:0004131(cytosine deaminase activity)|GO:0005515(protein binding)|GO:0005622(intracellular)|GO:0005634(nucleus)|GO:0005654(nucleoplasm)|GO:0005720(nuclear heterochromatin)|GO:0005737(cytoplasm)|GO:0005783…	Hs.282795	ENST00000395489	Homo sapiens APOBEC1 complementation factor (A1CF), transcript variant 3, mRNA [NM_138933]	hs|10q11.49	NP48338048	GO:0000166(nucleotide binding)|GO:0003725(double-stranded RNA binding)|GO:0003727(single-stranded RNA binding)|GO:0005515(protein binding)|GO:0005634(nucleus)|GO:0005737(cytoplasm)|GO:0005783(endoplasmic reticulum)|GO:0006397(mRNA processing)|GO:0030895(apolipoprotein B mRNA editing enzyme complex)|GO:0050821(protein stabilization)	APOBEC1 complementation factor	GACAGCTATTCTTGTACAAAATAACTATTCCTGCTCTAGCCAGCCAGAATCCTGCAATCC	225979	GO:30895(apolipoprotein B mRNA editing enzyme complex); GO:5737(cytoplasm); GO:5634(nucleus)	GO:3725(double-stranded RNA binding); GO:3676(nucleic acid binding); GO:166(nucleotide binding); GO:5515(protein binding); GO:3727(single-stranded RNA binding)	Mammalian apolipoprotein B mRNA undergoes site-specific C to U deamination, which is mediated by a multi-component enzyme complex containing a minimal core composed of APOBEC-1 and a complementation factor encoded by this gene. The gene product has three non-identical RNA recognition motifs and belongs to the hnRNP R family of RNA-binding proteins. It has been proposed that this complementation f…	GO:6381(mRNA editing); GO:6397(mRNA processing); GO:50821(protein stabilization)			apobec-1 complementation factor isoform 29			16055734; 15164054; 15148397; 14702039; 12896982; 12881431; 12477932; 11871661; 11815617; 11752456; 11718896; 11577082; 11571303; 11352648; 11329013; 11134005; 11072063; 10833526; 10781591; 10669785
A_32_P110898	A2LD27	0.0880625	P	508282	598762	LOC87795	NM_033110	NM_033110	NM_033110	A2LD27	chr13:101183916-101183883	GO:0003839(gamma-glutamylcyclotransferase activity)|GO:0016746(transferase activity, transferring acyl groups)|GO:0042219(cellular modified amino acid catabolic process)	Hs.350868	ENST00000455100	Homo sapiens AIG2-like domain 1 (A2LD1), transcript variant 1, mRNA [NM_033110]	hs|13q32.29	THC2610216		AIG2-like domain 27	GCTGTATATCAGAGTGCGTATAGCACCATTCTTCCTAATTTTCAGATCAAGCTTCACAGC	226619		GO:0005554(molecular function unknown)					LOC87769 protein			14702039; 12477958
A_23_P116924	A2M	0.0826206	P	511028	601996	CPAMD5; FWP007; S863-7; alpha 2M; DKFZp779B112	NM_000014	NM_000014	NM_000014	A2M	chr12:009221418-009221385	GO:0001869(negative regulation of complement activation, lectin pathway)|GO:0002576(platelet degranulation)|GO:0004867(serine-type endopeptidase inhibitor activity)|GO:0005515(protein binding)|GO:0005576(extracellular region)|GO:0005615(extracellular space)|GO:0005829(cytosol)|GO:0007264(small GTPase mediated signal transduction)|GO:0007596(blood coagulation)|GO:0007597(blood coagulation, intrins…	Hs.212838	ENST00000540099	Homo sapiens alpha-2-macroglobulin (A2M), mRNA [NM_000014]	hs|12p13.31	NP1311690	GO:0001869(negative regulation of complement activation, lectin pathway)|GO:0004867(serine-type endopeptidase inhibitor activity)|GO:0005576(extracellular region)|GO:0005615(extracellular space)|GO:0006953(acute-phase response)|GO:0007584(response to nutrient)|GO:0010037(response to carbon dioxide)|GO:0019899(enzyme binding)|GO:0019959(interleukin-8 binding)|GO:0019966(interleukin-1 binding)|GO:0…	alpha-2-macroglobulin	CTTGTTCTTCACGGTTCTGCAAGATGTCCCAGTAAGAGATCTGAAACCAGCCATAGTGAA	227260	GO:5576(extracellular region)	GO:19899(enzyme binding); GO:19966(interleukin-1 binding); GO:19959(interleukin-8 binding); GO:8320(protein carrier activity); GO:4867(serine-type endopeptidase inhibitor activity); GO:43120(tumor necrosis factor binding); GO:17114(wide-spectrum protease inhibitor activity)	Alpha-2-macroglobulin is a protease inhibitor and cytokine transporter. It inhibits many proteases, including trypsin, thrombin and collagenase. A2M is implicated in Alzheimer disease (AD) due to its ability to mediate the clearance and degradation of A-beta, the major component of beta-amyloid deposits.	GO:6886(intracellular protein transport); GO:51260(protein homooligomerization)			alpha-2-macroglobulin precursor	Alzheimer disease, susceptibility to; Emphysema due to alpha-2-macroglobulin deficiency	KEGG pathway: Alzheimer's disease 05010; KEGG pathway: Complement and coagulation cascades 04610; Reactome Event:Hemostasis 109608	17071617; 16910174; 16784755; 16641085; 16407218; 16335952; 16297527; 16232083; 15931081; 15910735; 15908432; 15611997; 15511627; 15489334; 15023809; 14760718; 14718574; 14715656; 14678766; 14675603; 14637088; 14506912; 12966032; 12755687; 12755614; 12754519; 12631277; 12477932; 12221172; 12194978; 12175343; 12062545; 12042276; 12015318; 11916201; 11910179; 11901360; 11823454; 11811950; 11435418;…
A_33_P3525289	A2ML27	0.0771787	A	513774	605231		NM_144670	NM_144670	NM_144670	A2ML27	chr12:009027061-009027146	GO:0004867(serine-type endopeptidase inhibitor activity)|GO:0005576(extracellular region)|GO:0005615(extracellular space)|GO:0010466(negative regulation of peptidase activity)|GO:0030414(peptidase inhibitor activity)|GO:0052548(regulation of endopeptidase activity)	Hs.620532	ENST00000541459	Homo sapiens alpha-2-macroglobulin-like 1 (A2ML1), mRNA [NM_144670]	hs|12p13.31	NP1314609	GO:0004867(serine-type endopeptidase inhibitor activity)|GO:0005515(protein binding)|GO:0005576(extracellular region)|GO:0005615(extracellular space)|GO:0052548(regulation of endopeptidase activity)	alpha-2-macroglobulin-like 27	AAAGTGTGCTGGTCACCAACTTGAAACCAGCAACCATCAAGGTCTATGACTACTACCTAC	227900
A_24_P151148	A1BG	0.0717368	A	516520	608466	A1B; ABG; GAB; HYST2477; DKFZp686F0997				A1BG	chr19:058857206-058857174	GO:0003674(molecular_function)|GO:0005576(extracellular region)|GO:0008150(biological_process)	Hs.529161		Homo sapiens cDNA FLJ31639 fis, clone NT2RI2003655, weakly similar to ZINC FINGER PROTEIN 195. [AK056201]	hs|19q13.43	THC2461029		alpha-1-B glycoprotein	GCTAGTGATCTGGTTTACTGCCTTAGTAATATCTAGTTCCTAATATGCCTATGCCTTTTA	228541	GO:5576(extracellular region)	GO:3674(molecular_function)	The protein encoded by this gene is a plasma glycoprotein of unknown function. The protein shows sequence similarity to the variable regions of some immunoglobulin supergene family member proteins.	GO:8150(biological_process)			alpha 1B-glycoprotein			16335952; 15489334; 15461460; 15221005; 14760718; 14702039; 12477932; 8889549; 3610142; 3458201; 2591094
A_33_P3685243	A1BG	0.066295	P	519266	611700		NM_130786	NM_130786	NM_130786	A1BG	chr19:058858293-058858261	GO:0003674(molecular_function)|GO:0005576(extracellular region)|GO:0008150(biological_process)	Hs.529161	ENST00000263100	Homo sapiens alpha-1-B glycoprotein (A1BG), mRNA [NM_130786]	hs|19q13.43	THC2461029	GO:0003674(molecular_function)|GO:0005576(extracellular region)|GO:0008150(biological_process)	alpha-1-B glycoprotein	TCTCTGGGGGGCTGGAGAAGCCTCCCTCATTCCTCCCAGGAATTAATAAATGTGAAGAGA	229181
A_24_P721726	A1BG-AS28	0.0608531	A	522012	614935	FLJ23596	NR_015380	NR_015380	NR_015380	A1BG-AS28	chr19:058866199-058866285		Hs.709582		Homo sapiens A1BG antisense RNA 1 (non-protein coding) (A1BG-AS1), non-coding RNA [NR_015380]	hs|19q13.43	NP49271873		A1BG antisense RNA 1 (non-protein coding)	AGGGTGTGCACAGAACTCAGAAGTCAGACCACTGAACAGTGACAGAACCTTTCAGCCCAT	229822					FLI_CDNA; oligo capping; fis (full insert sequence)					12477959
A_23_P104251	A1CF	0.0554112	P	524758	618170	ACF; ASP; ACF64; ACF65; MGC163391; RP11-564C4.29	NM_138933	NM_138933	NM_138933	A1CF	chr10:052570857-052570827	GO:0000166(nucleotide binding)|GO:0003676(nucleic acid binding)|GO:0003723(RNA binding)|GO:0003725(double-stranded RNA binding)|GO:0003727(single-stranded RNA binding)|GO:0003729(mRNA binding)|GO:0004131(cytosine deaminase activity)|GO:0005515(protein binding)|GO:0005622(intracellular)|GO:0005634(nucleus)|GO:0005654(nucleoplasm)|GO:0005720(nuclear heterochromatin)|GO:0005737(cytoplasm)|GO:0005783…	Hs.282795	ENST00000395489	Homo sapiens APOBEC1 complementation factor (A1CF), transcript variant 3, mRNA [NM_138933]	hs|10q11.50	NP50205698	GO:0000166(nucleotide binding)|GO:0003725(double-stranded RNA binding)|GO:0003727(single-stranded RNA binding)|GO:0005515(protein binding)|GO:0005634(nucleus)|GO:0005737(cytoplasm)|GO:0005783(endoplasmic reticulum)|GO:0006397(mRNA processing)|GO:0030895(apolipoprotein B mRNA editing enzyme complex)|GO:0050821(protein stabilization)	APOBEC1 complementation factor	GACAGCTATTCTTGTACAAAATAACTATTCCTGCTCTAGCCAGCCAGAATCCTGCAATCC	230462	GO:30895(apolipoprotein B mRNA editing enzyme complex); GO:5737(cytoplasm); GO:5634(nucleus)	GO:3725(double-stranded RNA binding); GO:3676(nucleic acid binding); GO:166(nucleotide binding); GO:5515(protein binding); GO:3727(single-stranded RNA binding)	Mammalian apolipoprotein B mRNA undergoes site-specific C to U deamination, which is mediated by a multi-component enzyme complex containing a minimal core composed of APOBEC-1 and a complementation factor encoded by this gene. The gene product has three non-identical RNA recognition motifs and belongs to the hnRNP R family of RNA-binding proteins. It has been proposed that this complementation f…	GO:6381(mRNA editing); GO:6397(mRNA processing); GO:50821(protein stabilization)			apobec-1 complementation factor isoform 30			16055734; 15164054; 15148397; 14702039; 12896982; 12881431; 12477932; 11871661; 11815617; 11752456; 11718896; 11577082; 11571303; 11352648; 11329013; 11134005; 11072063; 10833526; 10781591; 10669786
A_32_P110899	A2LD28	0.0499693	P	527504	621404	LOC87796	NM_033110	NM_033110	NM_033110	A2LD28	chr13:101183916-101183884	GO:0003839(gamma-glutamylcyclotransferase activity)|GO:0016746(transferase activity, transferring acyl groups)|GO:0042219(cellular modified amino acid catabolic process)	Hs.350868	ENST00000455100	Homo sapiens AIG2-like domain 1 (A2LD1), transcript variant 1, mRNA [NM_033110]	hs|13q32.30	THC2610217		AIG2-like domain 28	GCTGTATATCAGAGTGCGTATAGCACCATTCTTCCTAATTTTCAGATCAAGCTTCACAGC	231103		GO:0005554(molecular function unknown)					LOC87769 protein			14702039; 12477959
A_23_P116925	A2M	0.0445275	P	530250	624639	CPAMD5; FWP007; S863-7; alpha 2M; DKFZp779B113	NM_000014	NM_000014	NM_000014	A2M	chr12:009221418-009221386	GO:0001869(negative regulation of complement activation, lectin pathway)|GO:0002576(platelet degranulation)|GO:0004867(serine-type endopeptidase inhibitor activity)|GO:0005515(protein binding)|GO:0005576(extracellular region)|GO:0005615(extracellular space)|GO:0005829(cytosol)|GO:0007264(small GTPase mediated signal transduction)|GO:0007596(blood coagulation)|GO:0007597(blood coagulation, intrins…	Hs.212838	ENST00000540099	Homo sapiens alpha-2-macroglobulin (A2M), mRNA [NM_000014]	hs|12p13.31	NP1317528	GO:0001869(negative regulation of complement activation, lectin pathway)|GO:0004867(serine-type endopeptidase inhibitor activity)|GO:0005576(extracellular region)|GO:0005615(extracellular space)|GO:0006953(acute-phase response)|GO:0007584(response to nutrient)|GO:0010037(response to carbon dioxide)|GO:0019899(enzyme binding)|GO:0019959(interleukin-8 binding)|GO:0019966(interleukin-1 binding)|GO:0…	alpha-2-macroglobulin	CTTGTTCTTCACGGTTCTGCAAGATGTCCCAGTAAGAGATCTGAAACCAGCCATAGTGAA	231743	GO:5576(extracellular region)	GO:19899(enzyme binding); GO:19966(interleukin-1 binding); GO:19959(interleukin-8 binding); GO:8320(protein carrier activity); GO:4867(serine-type endopeptidase inhibitor activity); GO:43120(tumor necrosis factor binding); GO:17114(wide-spectrum protease inhibitor activity)	Alpha-2-macroglobulin is a protease inhibitor and cytokine transporter. It inhibits many proteases, including trypsin, thrombin and collagenase. A2M is implicated in Alzheimer disease (AD) due to its ability to mediate the clearance and degradation of A-beta, the major component of beta-amyloid deposits.	GO:6886(intracellular protein transport); GO:51260(protein homooligomerization)			alpha-2-macroglobulin precursor	Alzheimer disease, susceptibility to; Emphysema due to alpha-2-macroglobulin deficiency	KEGG pathway: Alzheimer's disease 05010; KEGG pathway: Complement and coagulation cascades 04610; Reactome Event:Hemostasis 109609	17071617; 16910174; 16784755; 16641085; 16407218; 16335952; 16297527; 16232083; 15931081; 15910735; 15908432; 15611997; 15511627; 15489334; 15023809; 14760718; 14718574; 14715656; 14678766; 14675603; 14637088; 14506912; 12966032; 12755687; 12755614; 12754519; 12631277; 12477932; 12221172; 12194978; 12175343; 12062545; 12042276; 12015318; 11916201; 11910179; 11901360; 11823454; 11811950; 11435418;…
A_33_P3525290	A2ML28	0.0390856	A	532996	627873		NM_144670	NM_144670	NM_144670	A2ML28	chr12:009027061-009027147	GO:0004867(serine-type endopeptidase inhibitor activity)|GO:0005576(extracellular region)|GO:0005615(extracellular space)|GO:0010466(negative regulation of peptidase activity)|GO:0030414(peptidase inhibitor activity)|GO:0052548(regulation of endopeptidase activity)	Hs.620532	ENST00000541459	Homo sapiens alpha-2-macroglobulin-like 1 (A2ML1), mRNA [NM_144670]	hs|12p13.31	NP1320447	GO:0004867(serine-type endopeptidase inhibitor activity)|GO:0005515(protein binding)|GO:0005576(extracellular region)|GO:0005615(extracellular space)|GO:0052548(regulation of endopeptidase activity)	alpha-2-macroglobulin-like 28	AAAGTGTGCTGGTCACCAACTTGAAACCAGCAACCATCAAGGTCTATGACTACTACCTAC	232384
A_24_P151149	A1BG	0.0336437	A	535742	631108	A1B; ABG; GAB; HYST2477; DKFZp686F0998				A1BG	chr19:058857206-058857175	GO:0003674(molecular_function)|GO:0005576(extracellular region)|GO:0008150(biological_process)	Hs.529161		Homo sapiens cDNA FLJ31639 fis, clone NT2RI2003655, weakly similar to ZINC FINGER PROTEIN 195. [AK056201]	hs|19q13.43	THC2461029		alpha-1-B glycoprotein	GCTAGTGATCTGGTTTACTGCCTTAGTAATATCTAGTTCCTAATATGCCTATGCCTTTTA	233024	GO:5576(extracellular region)	GO:3674(molecular_function)	The protein encoded by this gene is a plasma glycoprotein of unknown function. The protein shows sequence similarity to the variable regions of some immunoglobulin supergene family member proteins.	GO:8150(biological_process)			alpha 1B-glycoprotein			16335952; 15489334; 15461460; 15221005; 14760718; 14702039; 12477932; 8889549; 3610142; 3458201; 2591095
A_33_P3685244	A1BG	0.0282018	P	538488	634343		NM_130786	NM_130786	NM_130786	A1BG	chr19:058858293-058858262	GO:0003674(molecular_function)|GO:0005576(extracellular region)|GO:0008150(biological_process)	Hs.529161	ENST00000263100	Homo sapiens alpha-1-B glycoprotein (A1BG), mRNA [NM_130786]	hs|19q13.43	THC2461029	GO:0003674(molecular_function)|GO:0005576(extracellular region)|GO:0008150(biological_process)	alpha-1-B glycoprotein	TCTCTGGGGGGCTGGAGAAGCCTCCCTCATTCCTCCCAGGAATTAATAAATGTGAAGAGA	233665
A_24_P721727	A1BG-AS29	0.02276	A	541234	637577	FLJ23597	NR_015380	NR_015380	NR_015380	A1BG-AS29	chr19:058866199-058866286		Hs.709582		Homo sapiens A1BG antisense RNA 1 (non-protein coding) (A1BG-AS1), non-coding RNA [NR_015380]	hs|19q13.43	NP51139523		A1BG antisense RNA 1 (non-protein coding)	AGGGTGTGCACAGAACTCAGAAGTCAGACCACTGAACAGTGACAGAACCTTTCAGCCCAT	234305					FLI_CDNA; oligo capping; fis (full insert sequence)					12477960
A_23_P104252	A1CF	0.0173181	P	543980	640812	ACF; ASP; ACF64; ACF65; MGC163391; RP11-564C4.30	NM_138933	NM_138933	NM_138933	A1CF	chr10:052570857-052570828	GO:0000166(nucleotide binding)|GO:0003676(nucleic acid binding)|GO:0003723(RNA binding)|GO:0003725(double-stranded RNA binding)|GO:0003727(single-stranded RNA binding)|GO:0003729(mRNA binding)|GO:0004131(cytosine deaminase activity)|GO:0005515(protein binding)|GO:0005622(intracellular)|GO:0005634(nucleus)|GO:0005654(nucleoplasm)|GO:0005720(nuclear heterochromatin)|GO:0005737(cytoplasm)|GO:0005783…	Hs.282795	ENST00000395489	Homo sapiens APOBEC1 complementation factor (A1CF), transcript variant 3, mRNA [NM_138933]	hs|10q11.51	NP52073348	GO:0000166(nucleotide binding)|GO:0003725(double-stranded RNA binding)|GO:0003727(single-stranded RNA binding)|GO:0005515(protein binding)|GO:0005634(nucleus)|GO:0005737(cytoplasm)|GO:0005783(endoplasmic reticulum)|GO:0006397(mRNA processing)|GO:0030895(apolipoprotein B mRNA editing enzyme complex)|GO:0050821(protein stabilization)	APOBEC1 complementation factor	GACAGCTATTCTTGTACAAAATAACTATTCCTGCTCTAGCCAGCCAGAATCCTGCAATCC	234946	GO:30895(apolipoprotein B mRNA editing enzyme complex); GO:5737(cytoplasm); GO:5634(nucleus)	GO:3725(double-stranded RNA binding); GO:3676(nucleic acid binding); GO:166(nucleotide binding); GO:5515(protein binding); GO:3727(single-stranded RNA binding)	Mammalian apolipoprotein B mRNA undergoes site-specific C to U deamination, which is mediated by a multi-component enzyme complex containing a minimal core composed of APOBEC-1 and a complementation factor encoded by this gene. The gene product has three non-identical RNA recognition motifs and belongs to the hnRNP R family of RNA-binding proteins. It has been proposed that this complementation f…	GO:6381(mRNA editing); GO:6397(mRNA processing); GO:50821(protein stabilization)			apobec-1 complementation factor isoform 31			16055734; 15164054; 15148397; 14702039; 12896982; 12881431; 12477932; 11871661; 11815617; 11752456; 11718896; 11577082; 11571303; 11352648; 11329013; 11134005; 11072063; 10833526; 10781591; 10669787
A_32_P110900	A2LD29	0.0118762	P	546725	644047	LOC87797	NM_033110	NM_033110	NM_033110	A2LD29	chr13:101183916-101183885	GO:0003839(gamma-glutamylcyclotransferase activity)|GO:0016746(transferase activity, transferring acyl groups)|GO:0042219(cellular modified amino acid catabolic process)	Hs.350868	ENST00000455100	Homo sapiens AIG2-like domain 1 (A2LD1), transcript variant 1, mRNA [NM_033110]	hs|13q32.31	THC2610218		AIG2-like domain 29	GCTGTATATCAGAGTGCGTATAGCACCATTCTTCCTAATTTTCAGATCAAGCTTCACAGC	235586		GO:0005554(molecular function unknown)					LOC87769 protein			14702039; 12477960
A_23_P116926	A2M	0.00643435	P	549471	647281	CPAMD5; FWP007; S863-7; alpha 2M; DKFZp779B114	NM_000014	NM_000014	NM_000014	A2M	chr12:009221418-009221387	GO:0001869(negative regulation of complement activation, lectin pathway)|GO:0002576(platelet degranulation)|GO:0004867(serine-type endopeptidase inhibitor activity)|GO:0005515(protein binding)|GO:0005576(extracellular region)|GO:0005615(extracellular space)|GO:0005829(cytosol)|GO:0007264(small GTPase mediated signal transduction)|GO:0007596(blood coagulation)|GO:0007597(blood coagulation, intrins…	Hs.212838	ENST00000540099	Homo sapiens alpha-2-macroglobulin (A2M), mRNA [NM_000014]	hs|12p13.31	NP1323366	GO:0001869(negative regulation of complement activation, lectin pathway)|GO:0004867(serine-type endopeptidase inhibitor activity)|GO:0005576(extracellular region)|GO:0005615(extracellular space)|GO:0006953(acute-phase response)|GO:0007584(response to nutrient)|GO:0010037(response to carbon dioxide)|GO:0019899(enzyme binding)|GO:0019959(interleukin-8 binding)|GO:0019966(interleukin-1 binding)|GO:0…	alpha-2-macroglobulin	CTTGTTCTTCACGGTTCTGCAAGATGTCCCAGTAAGAGATCTGAAACCAGCCATAGTGAA	236227	GO:5576(extracellular region)	GO:19899(enzyme binding); GO:19966(interleukin-1 binding); GO:19959(interleukin-8 binding); GO:8320(protein carrier activity); GO:4867(serine-type endopeptidase inhibitor activity); GO:43120(tumor necrosis factor binding); GO:17114(wide-spectrum protease inhibitor activity)	Alpha-2-macroglobulin is a protease inhibitor and cytokine transporter. It inhibits many proteases, including trypsin, thrombin and collagenase. A2M is implicated in Alzheimer disease (AD) due to its ability to mediate the clearance and degradation of A-beta, the major component of beta-amyloid deposits.	GO:6886(intracellular protein transport); GO:51260(protein homooligomerization)			alpha-2-macroglobulin precursor	Alzheimer disease, susceptibility to; Emphysema due to alpha-2-macroglobulin deficiency	KEGG pathway: Alzheimer's disease 05010; KEGG pathway: Complement and coagulation cascades 04610; Reactome Event:Hemostasis 109610	17071617; 16910174; 16784755; 16641085; 16407218; 16335952; 16297527; 16232083; 15931081; 15910735; 15908432; 15611997; 15511627; 15489334; 15023809; 14760718; 14718574; 14715656; 14678766; 14675603; 14637088; 14506912; 12966032; 12755687; 12755614; 12754519; 12631277; 12477932; 12221172; 12194978; 12175343; 12062545; 12042276; 12015318; 11916201; 11910179; 11901360; 11823454; 11811950; 11435418;…
A_33_P3525291	A2ML29	0.000992471	A	552217	650516		NM_144670	NM_144670	NM_144670	A2ML29	chr12:009027061-009027148	GO:0004867(serine-type endopeptidase inhibitor activity)|GO:0005576(extracellular region)|GO:0005615(extracellular space)|GO:0010466(negative regulation of peptidase activity)|GO:0030414(peptidase inhibitor activity)|GO:0052548(regulation of endopeptidase activity)	Hs.620532	ENST00000541459	Homo sapiens alpha-2-macroglobulin-like 1 (A2ML1), mRNA [NM_144670]	hs|12p13.31	NP1326285	GO:0004867(serine-type endopeptidase inhibitor activity)|GO:0005515(protein binding)|GO:0005576(extracellular region)|GO:0005615(extracellular space)|GO:0052548(regulation of endopeptidase activity)	alpha-2-macroglobulin-like 29	AAAGTGTGCTGGTCACCAACTTGAAACCAGCAACCATCAAGGTCTATGACTACTACCTAC	236867
A_24_P151150	A1BG	-0.0044494	A	554963	653751	A1B; ABG; GAB; HYST2477; DKFZp686F0999				A1BG	chr19:058857206-058857176	GO:0003674(molecular_function)|GO:0005576(extracellular region)|GO:0008150(biological_process)	Hs.529161		Homo sapiens cDNA FLJ31639 fis, clone NT2RI2003655, weakly similar to ZINC FINGER PROTEIN 195. [AK056201]	hs|19q13.43	THC2461029		alpha-1-B glycoprotein	GCTAGTGATCTGGTTTACTGCCTTAGTAATATCTAGTTCCTAATATGCCTATGCCTTTTA	237508	GO:5576(extracellular region)	GO:3674(molecular_function)	The protein encoded by this gene is a plasma glycoprotein of unknown function. The protein shows sequence similarity to the variable regions of some immunoglobulin supergene family member proteins.	GO:8150(biological_process)			alpha 1B-glycoprotein			16335952; 15489334; 15461460; 15221005; 14760718; 14702039; 12477932; 8889549; 3610142; 3458201; 2591096
A_33_P3685245	A1BG	-0.00989128	P	557709	656985		NM_130786	NM_130786	NM_130786	A1BG	chr19:058858293-058858263	GO:0003674(molecular_function)|GO:0005576(extracellular region)|GO:0008150(biological_process)	Hs.529161	ENST00000263100	Homo sapiens alpha-1-B glycoprotein (A1BG), mRNA [NM_130786]	hs|19q13.43	THC2461029	GO:0003674(molecular_function)|GO:0005576(extracellular region)|GO:0008150(biological_process)	alpha-1-B glycoprotein	TCTCTGGGGGGCTGGAGAAGCCTCCCTCATTCCTCCCAGGAATTAATAAATGTGAAGAGA	238148
A_24_P721728	A1BG-AS30	-0.0153332	A	560455	660220	FLJ23598	NR_015380	NR_015380	NR_015380	A1BG-AS30	chr19:058866199-058866287		Hs.709582		Homo sapiens A1BG antisense RNA 1 (non-protein coding) (A1BG-AS1), non-coding RNA [NR_015380]	hs|19q13.43	NP53007173		A1BG antisense RNA 1 (non-protein coding)	AGGGTGTGCACAGAACTCAGAAGTCAGACCACTGAACAGTGACAGAACCTTTCAGCCCAT	238789					FLI_CDNA; oligo capping; fis (full insert sequence)					12477961
A_23_P104253	A1CF	-0.020775	P	563201	663455	ACF; ASP; ACF64; ACF65; MGC163391; RP11-564C4.31	NM_138933	NM_138933	NM_138933	A1CF	chr10:052570857-052570829	GO:0000166(nucleotide binding)|GO:0003676(nucleic acid binding)|GO:0003723(RNA binding)|GO:0003725(double-stranded RNA binding)|GO:0003727(single-stranded RNA binding)|GO:0003729(mRNA binding)|GO:0004131(cytosine deaminase activity)|GO:0005515(protein binding)|GO:0005622(intracellular)|GO:0005634(nucleus)|GO:0005654(nucleoplasm)|GO:0005720(nuclear heterochromatin)|GO:0005737(cytoplasm)|GO:0005783…	Hs.282795	ENST00000395489	Homo sapiens APOBEC1 complementation factor (A1CF), transcript variant 3, mRNA [NM_138933]	hs|10q11.52	NP53940998	GO:0000166(nucleotide binding)|GO:0003725(double-stranded RNA binding)|GO:0003727(single-stranded RNA binding)|GO:0005515(protein binding)|GO:0005634(nucleus)|GO:0005737(cytoplasm)|GO:0005783(endoplasmic reticulum)|GO:0006397(mRNA processing)|GO:0030895(apolipoprotein B mRNA editing enzyme complex)|GO:0050821(protein stabilization)	APOBEC1 complementation factor	GACAGCTATTCTTGTACAAAATAACTATTCCTGCTCTAGCCAGCCAGAATCCTGCAATCC	239429	GO:30895(apolipoprotein B mRNA editing enzyme complex); GO:5737(cytoplasm); GO:5634(nucleus)	GO:3725(double-stranded RNA binding); GO:3676(nucleic acid binding); GO:166(nucleotide binding); GO:5515(protein binding); GO:3727(single-stranded RNA binding)	Mammalian apolipoprotein B mRNA undergoes site-specific C to U deamination, which is mediated by a multi-component enzyme complex containing a minimal core composed of APOBEC-1 and a complementation factor encoded by this gene. The gene product has three non-identical RNA recognition motifs and belongs to the hnRNP R family of RNA-binding proteins. It has been proposed that this complementation f…	GO:6381(mRNA editing); GO:6397(mRNA processing); GO:50821(protein stabilization)			apobec-1 complementation factor isoform 32			16055734; 15164054; 15148397; 14702039; 12896982; 12881431; 12477932; 11871661; 11815617; 11752456; 11718896; 11577082; 11571303; 11352648; 11329013; 11134005; 11072063; 10833526; 10781591; 10669788
A_32_P110901	A2LD30	-0.0262169	P	565947	666689	LOC87798	NM_033110	NM_033110	NM_033110	A2LD30	chr13:101183916-101183886	GO:0003839(gamma-glutamylcyclotransferase activity)|GO:0016746(transferase activity, transferring acyl groups)|GO:0042219(cellular modified amino acid catabolic process)	Hs.350868	ENST00000455100	Homo sapiens AIG2-like domain 1 (A2LD1), transcript variant 1, mRNA [NM_033110]	hs|13q32.32	THC2610219		AIG2-like domain 30	GCTGTATATCAGAGTGCGTATAGCACCATTCTTCCTAATTTTCAGATCAAGCTTCACAGC	240070		GO:0005554(molecular function unknown)					LOC87769 protein			14702039; 12477961
A_23_P116927	A2M	-0.0316588	P	568693	669924	CPAMD5; FWP007; S863-7; alpha 2M; DKFZp779B115	NM_000014	NM_000014	NM_000014	A2M	chr12:009221418-009221388	GO:0001869(negative regulation of complement activation, lectin pathway)|GO:0002576(platelet degranulation)|GO:0004867(serine-type endopeptidase inhibitor activity)|GO:0005515(protein binding)|GO:0005576(extracellular region)|GO:0005615(extracellular space)|GO:0005829(cytosol)|GO:0007264(small GTPase mediated signal transduction)|GO:0007596(blood coagulation)|GO:0007597(blood coagulation, intrins…	Hs.212838	ENST00000540099	Homo sapiens alpha-2-macroglobulin (A2M), mRNA [NM_000014]	hs|12p13.31	NP1329204	GO:0001869(negative regulation of complement activation, lectin pathway)|GO:0004867(serine-type endopeptidase inhibitor activity)|GO:0005576(extracellular region)|GO:0005615(extracellular space)|GO:0006953(acute-phase response)|GO:0007584(response to nutrient)|GO:0010037(response to carbon dioxide)|GO:0019899(enzyme binding)|GO:0019959(interleukin-8 binding)|GO:0019966(interleukin-1 binding)|GO:0…	alpha-2-macroglobulin	CTTGTTCTTCACGGTTCTGCAAGATGTCCCAGTAAGAGATCTGAAACCAGCCATAGTGAA	240710	GO:5576(extracellular region)	GO:19899(enzyme binding); GO:19966(interleukin-1 binding); GO:19959(interleukin-8 binding); GO:8320(protein carrier activity); GO:4867(serine-type endopeptidase inhibitor activity); GO:43120(tumor necrosis factor binding); GO:17114(wide-spectrum protease inhibitor activity)	Alpha-2-macroglobulin is a protease inhibitor and cytokine transporter. It inhibits many proteases, including trypsin, thrombin and collagenase. A2M is implicated in Alzheimer disease (AD) due to its ability to mediate the clearance and degradation of A-beta, the major component of beta-amyloid deposits.	GO:6886(intracellular protein transport); GO:51260(protein homooligomerization)			alpha-2-macroglobulin precursor	Alzheimer disease, susceptibility to; Emphysema due to alpha-2-macroglobulin deficiency	KEGG pathway: Alzheimer's disease 05010; KEGG pathway: Complement and coagulation cascades 04610; Reactome Event:Hemostasis 109611	17071617; 16910174; 16784755; 16641085; 16407218; 16335952; 16297527; 16232083; 15931081; 15910735; 15908432; 15611997; 15511627; 15489334; 15023809; 14760718; 14718574; 14715656; 14678766; 14675603; 14637088; 14506912; 12966032; 12755687; 12755614; 12754519; 12631277; 12477932; 12221172; 12194978; 12175343; 12062545; 12042276; 12015318; 11916201; 11910179; 11901360; 11823454; 11811950; 11435418;…
A_33_P3525292	A2ML30	-0.0371007	A	571439	673159		NM_144670	NM_144670	NM_144670	A2ML30	chr12:009027061-009027149	GO:0004867(serine-type endopeptidase inhibitor activity)|GO:0005576(extracellular region)|GO:0005615(extracellular space)|GO:0010466(negative regulation of peptidase activity)|GO:0030414(peptidase inhibitor activity)|GO:0052548(regulation of endopeptidase activity)	Hs.620532	ENST00000541459	Homo sapiens alpha-2-macroglobulin-like 1 (A2ML1), mRNA [NM_144670]	hs|12p13.31	NP1332123	GO:0004867(serine-type endopeptidase inhibitor activity)|GO:0005515(protein binding)|GO:0005576(extracellular region)|GO:0005615(extracellular space)|GO:0052548(regulation of endopeptidase activity)	alpha-2-macroglobulin-like 30	AAAGTGTGCTGGTCACCAACTTGAAACCAGCAACCATCAAGGTCTATGACTACTACCTAC	241351
A_24_P151151	A1BG	-0.0425425	A	574185	676393	A1B; ABG; GAB; HYST2477; DKFZp686F1000				A1BG	chr19:058857206-058857177	GO:0003674(molecular_function)|GO:0005576(extracellular region)|GO:0008150(biological_process)	Hs.529161		Homo sapiens cDNA FLJ31639 fis, clone NT2RI2003655, weakly similar to ZINC FINGER PROTEIN 195. [AK056201]	hs|19q13.43	THC2461029		alpha-1-B glycoprotein	GCTAGTGATCTGGTTTACTGCCTTAGTAATATCTAGTTCCTAATATGCCTATGCCTTTTA	241991	GO:5576(extracellular region)	GO:3674(molecular_function)	The protein encoded by this gene is a plasma glycoprotein of unknown function. The protein shows sequence similarity to the variable regions of some immunoglobulin supergene family member proteins.	GO:8150(biological_process)			alpha 1B-glycoprotein			16335952; 15489334; 15461460; 15221005; 14760718; 14702039; 12477932; 8889549; 3610142; 3458201; 2591097
A_33_P3685246	A1BG	-0.0479844	P	576931	679628		NM_130786	NM_130786	NM_130786	A1BG	chr19:058858293-058858264	GO:0003674(molecular_function)|GO:0005576(extracellular region)|GO:0008150(biological_process)	Hs.529161	ENST00000263100	Homo sapiens alpha-1-B glycoprotein (A1BG), mRNA [NM_130786]	hs|19q13.43	THC2461029	GO:0003674(molecular_function)|GO:0005576(extracellular region)|GO:0008150(biological_process)	alpha-1-B glycoprotein	TCTCTGGGGGGCTGGAGAAGCCTCCCTCATTCCTCCCAGGAATTAATAAATGTGAAGAGA	242632
A_24_P721729	A1BG-AS31	-0.0534263	A	579677	682863	FLJ23599	NR_015380	NR_015380	NR_015380	A1BG-AS31	chr19:058866199-058866288		Hs.709582		Homo sapiens A1BG antisense RNA 1 (non-protein coding) (A1BG-AS1), non-coding RNA [NR_015380]	hs|19q13.43	NP54874823		A1BG antisense RNA 1 (non-protein coding)	AGGGTGTGCACAGAACTCAGAAGTCAGACCACTGAACAGTGACAGAACCTTTCAGCCCAT	243272					FLI_CDNA; oligo capping; fis (full insert sequence)					12477962
A_23_P104254	A1CF	-0.0588682	P	582423	686097	ACF; ASP; ACF64; ACF65; MGC163391; RP11-564C4.32	NM_138933	NM_138933	NM_138933	A1CF	chr10:052570857-052570830	GO:0000166(nucleotide binding)|GO:0003676(nucleic acid binding)|GO:0003723(RNA binding)|GO:0003725(double-stranded RNA binding)|GO:0003727(single-stranded RNA binding)|GO:0003729(mRNA binding)|GO:0004131(cytosine deaminase activity)|GO:0005515(protein binding)|GO:0005622(intracellular)|GO:0005634(nucleus)|GO:0005654(nucleoplasm)|GO:0005720(nuclear heterochromatin)|GO:0005737(cytoplasm)|GO:0005783…	Hs.282795	ENST00000395489	Homo sapiens APOBEC1 complementation factor (A1CF), transcript variant 3, mRNA [NM_138933]	hs|10q11.53	NP55808648	GO:0000166(nucleotide binding)|GO:0003725(double-stranded RNA binding)|GO:0003727(single-stranded RNA binding)|GO:0005515(protein binding)|GO:0005634(nucleus)|GO:0005737(cytoplasm)|GO:0005783(endoplasmic reticulum)|GO:0006397(mRNA processing)|GO:0030895(apolipoprotein B mRNA editing enzyme complex)|GO:0050821(protein stabilization)	APOBEC1 complementation factor	GACAGCTATTCTTGTACAAAATAACTATTCCTGCTCTAGCCAGCCAGAATCCTGCAATCC	243913	GO:30895(apolipoprotein B mRNA editing enzyme complex); GO:5737(cytoplasm); GO:5634(nucleus)	GO:3725(double-stranded RNA binding); GO:3676(nucleic acid binding); GO:166(nucleotide binding); GO:5515(protein binding); GO:3727(single-stranded RNA binding)	Mammalian apolipoprotein B mRNA undergoes site-specific C to U deamination, which is mediated by a multi-component enzyme complex containing a minimal core composed of APOBEC-1 and a complementation factor encoded by this gene. The gene product has three non-identical RNA recognition motifs and belongs to the hnRNP R family of RNA-binding proteins. It has been proposed that this complementation f…	GO:6381(mRNA editing); GO:6397(mRNA processing); GO:50821(protein stabilization)			apobec-1 complementation factor isoform 33			16055734; 15164054; 15148397; 14702039; 12896982; 12881431; 12477932; 11871661; 11815617; 11752456; 11718896; 11577082; 11571303; 11352648; 11329013; 11134005; 11072063; 10833526; 10781591; 10669789
A_32_P110902	A2LD31	-0.06431	P	585169	689332	LOC87799	NM_033110	NM_033110	NM_033110	A2LD31	chr13:101183916-101183887	GO:0003839(gamma-glutamylcyclotransferase activity)|GO:0016746(transferase activity, transferring acyl groups)|GO:0042219(cellular modified amino acid catabolic process)	Hs.350868	ENST00000455100	Homo sapiens AIG2-like domain 1 (A2LD1), transcript variant 1, mRNA [NM_033110]	hs|13q32.33	THC2610220		AIG2-like domain 31	GCTGTATATCAGAGTGCGTATAGCACCATTCTTCCTAATTTTCAGATCAAGCTTCACAGC	244553		GO:0005554(molecular function unknown)					LOC87769 protein			14702039; 12477962
A_23_P116928	A2M	-0.0697519	P	587915	692567	CPAMD5; FWP007; S863-7; alpha 2M; DKFZp779B116	NM_000014	NM_000014	NM_000014	A2M	chr12:009221418-009221389	GO:0001869(negative regulation of complement activation, lectin pathway)|GO:0002576(platelet degranulation)|GO:0004867(serine-type endopeptidase inhibitor activity)|GO:0005515(protein binding)|GO:0005576(extracellular region)|GO:0005615(extracellular space)|GO:0005829(cytosol)|GO:0007264(small GTPase mediated signal transduction)|GO:0007596(blood coagulation)|GO:0007597(blood coagulation, intrins…	Hs.212838	ENST00000540099	Homo sapiens alpha-2-macroglobulin (A2M), mRNA [NM_000014]	hs|12p13.31	NP1335042	GO:0001869(negative regulation of complement activation, lectin pathway)|GO:0004867(serine-type endopeptidase inhibitor activity)|GO:0005576(extracellular region)|GO:0005615(extracellular space)|GO:0006953(acute-phase response)|GO:0007584(response to nutrient)|GO:0010037(response to carbon dioxide)|GO:0019899(enzyme binding)|GO:0019959(interleukin-8 binding)|GO:0019966(interleukin-1 binding)|GO:0…	alpha-2-macroglobulin	CTTGTTCTTCACGGTTCTGCAAGATGTCCCAGTAAGAGATCTGAAACCAGCCATAGTGAA	245194	GO:5576(extracellular region)	GO:19899(enzyme binding); GO:19966(interleukin-1 binding); GO:19959(interleukin-8 binding); GO:8320(protein carrier activity); GO:4867(serine-type endopeptidase inhibitor activity); GO:43120(tumor necrosis factor binding); GO:17114(wide-spectrum protease inhibitor activity)	Alpha-2-macroglobulin is a protease inhibitor and cytokine transporter. It inhibits many proteases, including trypsin, thrombin and collagenase. A2M is implicated in Alzheimer disease (AD) due to its ability to mediate the clearance and degradation of A-beta, the major component of beta-amyloid deposits.	GO:6886(intracellular protein transport); GO:51260(protein homooligomerization)			alpha-2-macroglobulin precursor	Alzheimer disease, susceptibility to; Emphysema due to alpha-2-macroglobulin deficiency	KEGG pathway: Alzheimer's disease 05010; KEGG pathway: Complement and coagulation cascades 04610; Reactome Event:Hemostasis 109612	17071617; 16910174; 16784755; 16641085; 16407218; 16335952; 16297527; 16232083; 15931081; 15910735; 15908432; 15611997; 15511627; 15489334; 15023809; 14760718; 14718574; 14715656; 14678766; 14675603; 14637088; 14506912; 12966032; 12755687; 12755614; 12754519; 12631277; 12477932; 12221172; 12194978; 12175343; 12062545; 12042276; 12015318; 11916201; 11910179; 11901360; 11823454; 11811950; 11435418;…
A_33_P3525293	A2ML31	-0.0751938	A	590660	695801		NM_144670	NM_144670	NM_144670	A2ML31	chr12:009027061-009027150	GO:0004867(serine-type endopeptidase inhibitor activity)|GO:0005576(extracellular region)|GO:0005615(extracellular space)|GO:0010466(negative regulation of peptidase activity)|GO:0030414(peptidase inhibitor activity)|GO:0052548(regulation of endopeptidase activity)	Hs.620532	ENST00000541459	Homo sapiens alpha-2-macroglobulin-like 1 (A2ML1), mRNA [NM_144670]	hs|12p13.31	NP1337961	GO:0004867(serine-type endopeptidase inhibitor activity)|GO:0005515(protein binding)|GO:0005576(extracellular region)|GO:0005615(extracellular space)|GO:0052548(regulation of endopeptidase activity)	alpha-2-macroglobulin-like 31	AAAGTGTGCTGGTCACCAACTTGAAACCAGCAACCATCAAGGTCTATGACTACTACCTAC	245834
A_24_P151152	A1BG	-0.0806357	A	593406	699036	A1B; ABG; GAB; HYST2477; DKFZp686F1001				A1BG	chr19:058857206-058857178	GO:0003674(molecular_function)|GO:0005576(extracellular region)|GO:0008150(biological_process)	Hs.529161		Homo sapiens cDNA FLJ31639 fis, clone NT2RI2003655, weakly similar to ZINC FINGER PROTEIN 195. [AK056201]	hs|19q13.43	THC2461029		alpha-1-B glycoprotein	GCTAGTGATCTGGTTTACTGCCTTAGTAATATCTAGTTCCTAATATGCCTATGCCTTTTA	246475	GO:5576(extracellular region)	GO:3674(molecular_function)	The protein encoded by this gene is a plasma glycoprotein of unknown function. The protein shows sequence similarity to the variable regions of some immunoglobulin supergene family member proteins.	GO:8150(biological_process)			alpha 1B-glycoprotein			16335952; 15489334; 15461460; 15221005; 14760718; 14702039; 12477932; 8889549; 3610142; 3458201; 2591098
A_33_P3685247	A1BG	-0.0860775	P	596152	702271		NM_130786	NM_130786	NM_130786	A1BG	chr19:058858293-058858265	GO:0003674(molecular_function)|GO:0005576(extracellular region)|GO:0008150(biological_process)	Hs.529161	ENST00000263100	Homo sapiens alpha-1-B glycoprotein (A1BG), mRNA [NM_130786]	hs|19q13.43	THC2461029	GO:0003674(molecular_function)|GO:0005576(extracellular region)|GO:0008150(biological_process)	alpha-1-B glycoprotein	TCTCTGGGGGGCTGGAGAAGCCTCCCTCATTCCTCCCAGGAATTAATAAATGTGAAGAGA	247115
A_24_P721730	A1BG-AS32	-0.0915194	A	598898	705505	FLJ23600	NR_015380	NR_015380	NR_015380	A1BG-AS32	chr19:058866199-058866289		Hs.709582		Homo sapiens A1BG antisense RNA 1 (non-protein coding) (A1BG-AS1), non-coding RNA [NR_015380]	hs|19q13.43	NP56742473		A1BG antisense RNA 1 (non-protein coding)	AGGGTGTGCACAGAACTCAGAAGTCAGACCACTGAACAGTGACAGAACCTTTCAGCCCAT	247756					FLI_CDNA; oligo capping; fis (full insert sequence)					12477963
A_23_P104255	A1CF	-0.0969613	P	601644	708740	ACF; ASP; ACF64; ACF65; MGC163391; RP11-564C4.33	NM_138933	NM_138933	NM_138933	A1CF	chr10:052570857-052570831	GO:0000166(nucleotide binding)|GO:0003676(nucleic acid binding)|GO:0003723(RNA binding)|GO:0003725(double-stranded RNA binding)|GO:0003727(single-stranded RNA binding)|GO:0003729(mRNA binding)|GO:0004131(cytosine deaminase activity)|GO:0005515(protein binding)|GO:0005622(intracellular)|GO:0005634(nucleus)|GO:0005654(nucleoplasm)|GO:0005720(nuclear heterochromatin)|GO:0005737(cytoplasm)|GO:0005783…	Hs.282795	ENST00000395489	Homo sapiens APOBEC1 complementation factor (A1CF), transcript variant 3, mRNA [NM_138933]	hs|10q11.54	NP57676298	GO:0000166(nucleotide binding)|GO:0003725(double-stranded RNA binding)|GO:0003727(single-stranded RNA binding)|GO:0005515(protein binding)|GO:0005634(nucleus)|GO:0005737(cytoplasm)|GO:0005783(endoplasmic reticulum)|GO:0006397(mRNA processing)|GO:0030895(apolipoprotein B mRNA editing enzyme complex)|GO:0050821(protein stabilization)	APOBEC1 complementation factor	GACAGCTATTCTTGTACAAAATAACTATTCCTGCTCTAGCCAGCCAGAATCCTGCAATCC	248396	GO:30895(apolipoprotein B mRNA editing enzyme complex); GO:5737(cytoplasm); GO:5634(nucleus)	GO:3725(double-stranded RNA binding); GO:3676(nucleic acid binding); GO:166(nucleotide binding); GO:5515(protein binding); GO:3727(single-stranded RNA binding)	Mammalian apolipoprotein B mRNA undergoes site-specific C to U deamination, which is mediated by a multi-component enzyme complex containing a minimal core composed of APOBEC-1 and a complementation factor encoded by this gene. The gene product has three non-identical RNA recognition motifs and belongs to the hnRNP R family of RNA-binding proteins. It has been proposed that this complementation f…	GO:6381(mRNA editing); GO:6397(mRNA processing); GO:50821(protein stabilization)			apobec-1 complementation factor isoform 34			16055734; 15164054; 15148397; 14702039; 12896982; 12881431; 12477932; 11871661; 11815617; 11752456; 11718896; 11577082; 11571303; 11352648; 11329013; 11134005; 11072063; 10833526; 10781591; 10669790
A_32_P110903	A2LD32	-0.102403	P	604390	711975	LOC87800	NM_033110	NM_033110	NM_033110	A2LD32	chr13:101183916-101183888	GO:0003839(gamma-glutamylcyclotransferase activity)|GO:0016746(transferase activity, transferring acyl groups)|GO:0042219(cellular modified amino acid catabolic process)	Hs.350868	ENST00000455100	Homo sapiens AIG2-like domain 1 (A2LD1), transcript variant 1, mRNA [NM_033110]	hs|13q32.34	THC2610221		AIG2-like domain 32	GCTGTATATCAGAGTGCGTATAGCACCATTCTTCCTAATTTTCAGATCAAGCTTCACAGC	249037		GO:0005554(molecular function unknown)					LOC87769 protein			14702039; 12477963
A_23_P116929	A2M	-0.107845	P	607136	715209	CPAMD5; FWP007; S863-7; alpha 2M; DKFZp779B117	NM_000014	NM_000014	NM_000014	A2M	chr12:009221418-009221390	GO:0001869(negative regulation of complement activation, lectin pathway)|GO:0002576(platelet degranulation)|GO:0004867(serine-type endopeptidase inhibitor activity)|GO:0005515(protein binding)|GO:0005576(extracellular region)|GO:0005615(extracellular space)|GO:0005829(cytosol)|GO:0007264(small GTPase mediated signal transduction)|GO:0007596(blood coagulation)|GO:0007597(blood coagulation, intrins…	Hs.212838	ENST00000540099	Homo sapiens alpha-2-macroglobulin (A2M), mRNA [NM_000014]	hs|12p13.31	NP1340880	GO:0001869(negative regulation of complement activation, lectin pathway)|GO:0004867(serine-type endopeptidase inhibitor activity)|GO:0005576(extracellular region)|GO:0005615(extracellular space)|GO:0006953(acute-phase response)|GO:0007584(response to nutrient)|GO:0010037(response to carbon dioxide)|GO:0019899(enzyme binding)|GO:0019959(interleukin-8 binding)|GO:0019966(interleukin-1 binding)|GO:0…	alpha-2-macroglobulin	CTTGTTCTTCACGGTTCTGCAAGATGTCCCAGTAAGAGATCTGAAACCAGCCATAGTGAA	249677	GO:5576(extracellular region)	GO:19899(enzyme binding); GO:19966(interleukin-1 binding); GO:19959(interleukin-8 binding); GO:8320(protein carrier activity); GO:4867(serine-type endopeptidase inhibitor activity); GO:43120(tumor necrosis factor binding); GO:17114(wide-spectrum protease inhibitor activity)	Alpha-2-macroglobulin is a protease inhibitor and cytokine transporter. It inhibits many proteases, including trypsin, thrombin and collagenase. A2M is implicated in Alzheimer disease (AD) due to its ability to mediate the clearance and degradation of A-beta, the major component of beta-amyloid deposits.	GO:6886(intracellular protein transport); GO:51260(protein homooligomerization)			alpha-2-macroglobulin precursor	Alzheimer disease, susceptibility to; Emphysema due to alpha-2-macroglobulin deficiency	KEGG pathway: Alzheimer's disease 05010; KEGG pathway: Complement and coagulation cascades 04610; Reactome Event:Hemostasis 109613	17071617; 16910174; 16784755; 16641085; 16407218; 16335952; 16297527; 16232083; 15931081; 15910735; 15908432; 15611997; 15511627; 15489334; 15023809; 14760718; 14718574; 14715656; 14678766; 14675603; 14637088; 14506912; 12966032; 12755687; 12755614; 12754519; 12631277; 12477932; 12221172; 12194978; 12175343; 12062545; 12042276; 12015318; 11916201; 11910179; 11901360; 11823454; 11811950; 11435418;…
A_33_P3525294	A2ML32	-0.113287	A	609882	718444		NM_144670	NM_144670	NM_144670	A2ML32	chr12:009027061-009027151	GO:0004867(serine-type endopeptidase inhibitor activity)|GO:0005576(extracellular region)|GO:0005615(extracellular space)|GO:0010466(negative regulation of peptidase activity)|GO:0030414(peptidase inhibitor activity)|GO:0052548(regulation of endopeptidase activity)	Hs.620532	ENST00000541459	Homo sapiens alpha-2-macroglobulin-like 1 (A2ML1), mRNA [NM_144670]	hs|12p13.31	NP1343799	GO:0004867(serine-type endopeptidase inhibitor activity)|GO:0005515(protein binding)|GO:0005576(extracellular region)|GO:0005615(extracellular space)|GO:0052548(regulation of endopeptidase activity)	alpha-2-macroglobulin-like 32	AAAGTGTGCTGGTCACCAACTTGAAACCAGCAACCATCAAGGTCTATGACTACTACCTAC	250318
A_24_P151153	A1BG	-0.118729	A	612628	721678	A1B; ABG; GAB; HYST2477; DKFZp686F1002				A1BG	chr19:058857206-058857179	GO:0003674(molecular_function)|GO:0005576(extracellular region)|GO:0008150(biological_process)	Hs.529161		Homo sapiens cDNA FLJ31639 fis, clone NT2RI2003655, weakly similar to ZINC FINGER PROTEIN 195. [AK056201]	hs|19q13.43	THC2461029		alpha-1-B glycoprotein	GCTAGTGATCTGGTTTACTGCCTTAGTAATATCTAGTTCCTAATATGCCTATGCCTTTTA	250958	GO:5576(extracellular region)	GO:3674(molecular_function)	The protein encoded by this gene is a plasma glycoprotein of unknown function. The protein shows sequence similarity to the variable regions of some immunoglobulin supergene family member proteins.	GO:8150(biological_process)			alpha 1B-glycoprotein			16335952; 15489334; 15461460; 15221005; 14760718; 14702039; 12477932; 8889549; 3610142; 3458201; 2591099
A_33_P3685248	A1BG	-0.124171	P	615374	724913		NM_130786	NM_130786	NM_130786	A1BG	chr19:058858293-058858266	GO:0003674(molecular_function)|GO:0005576(extracellular region)|GO:0008150(biological_process)	Hs.529161	ENST00000263100	Homo sapiens alpha-1-B glycoprotein (A1BG), mRNA [NM_130786]	hs|19q13.43	THC2461029	GO:0003674(molecular_function)|GO:0005576(extracellular region)|GO:0008150(biological_process)	alpha-1-B glycoprotein	TCTCTGGGGGGCTGGAGAAGCCTCCCTCATTCCTCCCAGGAATTAATAAATGTGAAGAGA	251599
A_24_P721731	A1BG-AS33	-0.129613	A	618120	728148	FLJ23601	NR_015380	NR_015380	NR_015380	A1BG-AS33	chr19:058866199-058866290		Hs.709582		Homo sapiens A1BG antisense RNA 1 (non-protein coding) (A1BG-AS1), non-coding RNA [NR_015380]	hs|19q13.43	NP58610123		A1BG antisense RNA 1 (non-protein coding)	AGGGTGTGCACAGAACTCAGAAGTCAGACCACTGAACAGTGACAGAACCTTTCAGCCCAT	252239					FLI_CDNA; oligo capping; fis (full insert sequence)					12477964
A_23_P104256	A1CF	-0.135054	P	620866	731382	ACF; ASP; ACF64; ACF65; MGC163391; RP11-564C4.34	NM_138933	NM_138933	NM_138933	A1CF	chr10:052570857-052570832	GO:0000166(nucleotide binding)|GO:0003676(nucleic acid binding)|GO:0003723(RNA binding)|GO:0003725(double-stranded RNA binding)|GO:0003727(single-stranded RNA binding)|GO:0003729(mRNA binding)|GO:0004131(cytosine deaminase activity)|GO:0005515(protein binding)|GO:0005622(intracellular)|GO:0005634(nucleus)|GO:0005654(nucleoplasm)|GO:0005720(nuclear heterochromatin)|GO:0005737(cytoplasm)|GO:0005783…	Hs.282795	ENST00000395489	Homo sapiens APOBEC1 complementation factor (A1CF), transcript variant 3, mRNA [NM_138933]	hs|10q11.55	NP59543948	GO:0000166(nucleotide binding)|GO:0003725(double-stranded RNA binding)|GO:0003727(single-stranded RNA binding)|GO:0005515(protein binding)|GO:0005634(nucleus)|GO:0005737(cytoplasm)|GO:0005783(endoplasmic reticulum)|GO:0006397(mRNA processing)|GO:0030895(apolipoprotein B mRNA editing enzyme complex)|GO:0050821(protein stabilization)	APOBEC1 complementation factor	GACAGCTATTCTTGTACAAAATAACTATTCCTGCTCTAGCCAGCCAGAATCCTGCAATCC	252880	GO:30895(apolipoprotein B mRNA editing enzyme complex); GO:5737(cytoplasm); GO:5634(nucleus)	GO:3725(double-stranded RNA binding); GO:3676(nucleic acid binding); GO:166(nucleotide binding); GO:5515(protein binding); GO:3727(single-stranded RNA binding)	Mammalian apolipoprotein B mRNA undergoes site-specific C to U deamination, which is mediated by a multi-component enzyme complex containing a minimal core composed of APOBEC-1 and a complementation factor encoded by this gene. The gene product has three non-identical RNA recognition motifs and belongs to the hnRNP R family of RNA-binding proteins. It has been proposed that this complementation f…	GO:6381(mRNA editing); GO:6397(mRNA processing); GO:50821(protein stabilization)			apobec-1 complementation factor isoform 35			16055734; 15164054; 15148397; 14702039; 12896982; 12881431; 12477932; 11871661; 11815617; 11752456; 11718896; 11577082; 11571303; 11352648; 11329013; 11134005; 11072063; 10833526; 10781591; 10669791
A_32_P110904	A2LD33	-0.140496	P	623612	734617	LOC87801	NM_033110	NM_033110	NM_033110	A2LD33	chr13:101183916-101183889	GO:0003839(gamma-glutamylcyclotransferase activity)|GO:0016746(transferase activity, transferring acyl groups)|GO:0042219(cellular modified amino acid catabolic process)	Hs.350868	ENST00000455100	Homo sapiens AIG2-like domain 1 (A2LD1), transcript variant 1, mRNA [NM_033110]	hs|13q32.35	THC2610222		AIG2-like domain 33	GCTGTATATCAGAGTGCGTATAGCACCATTCTTCCTAATTTTCAGATCAAGCTTCACAGC	253520		GO:0005554(molecular function unknown)					LOC87769 protein			14702039; 12477964
A_23_P116930	A2M	-0.145938	P	626358	737852	CPAMD5; FWP007; S863-7; alpha 2M; DKFZp779B118	NM_000014	NM_000014	NM_000014	A2M	chr12:009221418-009221391	GO:0001869(negative regulation of complement activation, lectin pathway)|GO:0002576(platelet degranulation)|GO:0004867(serine-type endopeptidase inhibitor activity)|GO:0005515(protein binding)|GO:0005576(extracellular region)|GO:0005615(extracellular space)|GO:0005829(cytosol)|GO:0007264(small GTPase mediated signal transduction)|GO:0007596(blood coagulation)|GO:0007597(blood coagulation, intrins…	Hs.212838	ENST00000540099	Homo sapiens alpha-2-macroglobulin (A2M), mRNA [NM_000014]	hs|12p13.31	NP1346718	GO:0001869(negative regulation of complement activation, lectin pathway)|GO:0004867(serine-type endopeptidase inhibitor activity)|GO:0005576(extracellular region)|GO:0005615(extracellular space)|GO:0006953(acute-phase response)|GO:0007584(response to nutrient)|GO:0010037(response to carbon dioxide)|GO:0019899(enzyme binding)|GO:0019959(interleukin-8 binding)|GO:0019966(interleukin-1 binding)|GO:0…	alpha-2-macroglobulin	CTTGTTCTTCACGGTTCTGCAAGATGTCCCAGTAAGAGATCTGAAACCAGCCATAGTGAA	254161	GO:5576(extracellular region)	GO:19899(enzyme binding); GO:19966(interleukin-1 binding); GO:19959(interleukin-8 binding); GO:8320(protein carrier activity); GO:4867(serine-type endopeptidase inhibitor activity); GO:43120(tumor necrosis factor binding); GO:17114(wide-spectrum protease inhibitor activity)	Alpha-2-macroglobulin is a protease inhibitor and cytokine transporter. It inhibits many proteases, including trypsin, thrombin and collagenase. A2M is implicated in Alzheimer disease (AD) due to its ability to mediate the clearance and degradation of A-beta, the major component of beta-amyloid deposits.	GO:6886(intracellular protein transport); GO:51260(protein homooligomerization)			alpha-2-macroglobulin precursor	Alzheimer disease, susceptibility to; Emphysema due to alpha-2-macroglobulin deficiency	KEGG pathway: Alzheimer's disease 05010; KEGG pathway: Complement and coagulation cascades 04610; Reactome Event:Hemostasis 109614	17071617; 16910174; 16784755; 16641085; 16407218; 16335952; 16297527; 16232083; 15931081; 15910735; 15908432; 15611997; 15511627; 15489334; 15023809; 14760718; 14718574; 14715656; 14678766; 14675603; 14637088; 14506912; 12966032; 12755687; 12755614; 12754519; 12631277; 12477932; 12221172; 12194978; 12175343; 12062545; 12042276; 12015318; 11916201; 11910179; 11901360; 11823454; 11811950; 11435418;…
A_33_P3525295	A2ML33	-0.15138	A	629104	741086		NM_144670	NM_144670	NM_144670	A2ML33	chr12:009027061-009027152	GO:0004867(serine-type endopeptidase inhibitor activity)|GO:0005576(extracellular region)|GO:0005615(extracellular space)|GO:0010466(negative regulation of peptidase activity)|GO:0030414(peptidase inhibitor activity)|GO:0052548(regulation of endopeptidase activity)	Hs.620532	ENST00000541459	Homo sapiens alpha-2-macroglobulin-like 1 (A2ML1), mRNA [NM_144670]	hs|12p13.31	NP1349637	GO:0004867(serine-type endopeptidase inhibitor activity)|GO:0005515(protein binding)|GO:0005576(extracellular region)|GO:0005615(extracellular space)|GO:0052548(regulation of endopeptidase activity)	alpha-2-macroglobulin-like 33	AAAGTGTGCTGGTCACCAACTTGAAACCAGCAACCATCAAGGTCTATGACTACTACCTAC	254801
A_24_P151154	A1BG	-0.156822	A	631850	744321	A1B; ABG; GAB; HYST2477; DKFZp686F1003				A1BG	chr19:058857206-058857180	GO:0003674(molecular_function)|GO:0005576(extracellular region)|GO:0008150(biological_process)	Hs.529161		Homo sapiens cDNA FLJ31639 fis, clone NT2RI2003655, weakly similar to ZINC FINGER PROTEIN 195. [AK056201]	hs|19q13.43	THC2461029		alpha-1-B glycoprotein	GCTAGTGATCTGGTTTACTGCCTTAGTAATATCTAGTTCCTAATATGCCTATGCCTTTTA	255442	GO:5576(extracellular region)	GO:3674(molecular_function)	The protein encoded by this gene is a plasma glycoprotein of unknown function. The protein shows sequence similarity to the variable regions of some immunoglobulin supergene family member proteins.	GO:8150(biological_process)			alpha 1B-glycoprotein			16335952; 15489334; 15461460; 15221005; 14760718; 14702039; 12477932; 8889549; 3610142; 3458201; 2591100
A_33_P3685249	A1BG	-0.162264	P	634595	747556		NM_130786	NM_130786	NM_130786	A1BG	chr19:058858293-058858267	GO:0003674(molecular_function)|GO:0005576(extracellular region)|GO:0008150(biological_process)	Hs.529161	ENST00000263100	Homo sapiens alpha-1-B glycoprotein (A1BG), mRNA [NM_130786]	hs|19q13.43	THC2461029	GO:0003674(molecular_function)|GO:0005576(extracellular region)|GO:0008150(biological_process)	alpha-1-B glycoprotein	TCTCTGGGGGGCTGGAGAAGCCTCCCTCATTCCTCCCAGGAATTAATAAATGTGAAGAGA	256082
A_24_P721732	A1BG-AS34	-0.167706	A	637341	750790	FLJ23602	NR_015380	NR_015380	NR_015380	A1BG-AS34	chr19:058866199-058866291		Hs.709582		Homo sapiens A1BG antisense RNA 1 (non-protein coding) (A1BG-AS1), non-coding RNA [NR_015380]	hs|19q13.43	NP60477773		A1BG antisense RNA 1 (non-protein coding)	AGGGTGTGCACAGAACTCAGAAGTCAGACCACTGAACAGTGACAGAACCTTTCAGCCCAT	256723					FLI_CDNA; oligo capping; fis (full insert sequence)					12477965
A_23_P104257	A1CF	-0.173148	P	640087	754025	ACF; ASP; ACF64; ACF65; MGC163391; RP11-564C4.35	NM_138933	NM_138933	NM_138933	A1CF	chr10:052570857-052570833	GO:0000166(nucleotide binding)|GO:0003676(nucleic acid binding)|GO:0003723(RNA binding)|GO:0003725(double-stranded RNA binding)|GO:0003727(single-stranded RNA binding)|GO:0003729(mRNA binding)|GO:0004131(cytosine deaminase activity)|GO:0005515(protein binding)|GO:0005622(intracellular)|GO:0005634(nucleus)|GO:0005654(nucleoplasm)|GO:0005720(nuclear heterochromatin)|GO:0005737(cytoplasm)|GO:0005783…	Hs.282795	ENST00000395489	Homo sapiens APOBEC1 complementation factor (A1CF), transcript variant 3, mRNA [NM_138933]	hs|10q11.56	NP61411598	GO:0000166(nucleotide binding)|GO:0003725(double-stranded RNA binding)|GO:0003727(single-stranded RNA binding)|GO:0005515(protein binding)|GO:0005634(nucleus)|GO:0005737(cytoplasm)|GO:0005783(endoplasmic reticulum)|GO:0006397(mRNA processing)|GO:0030895(apolipoprotein B mRNA editing enzyme complex)|GO:0050821(protein stabilization)	APOBEC1 complementation factor	GACAGCTATTCTTGTACAAAATAACTATTCCTGCTCTAGCCAGCCAGAATCCTGCAATCC	257363	GO:30895(apolipoprotein B mRNA editing enzyme complex); GO:5737(cytoplasm); GO:5634(nucleus)	GO:3725(double-stranded RNA binding); GO:3676(nucleic acid binding); GO:166(nucleotide binding); GO:5515(protein binding); GO:3727(single-stranded RNA binding)	Mammalian apolipoprotein B mRNA undergoes site-specific C to U deamination, which is mediated by a multi-component enzyme complex containing a minimal core composed of APOBEC-1 and a complementation factor encoded by this gene. The gene product has three non-identical RNA recognition motifs and belongs to the hnRNP R family of RNA-binding proteins. It has been proposed that this complementation f…	GO:6381(mRNA editing); GO:6397(mRNA processing); GO:50821(protein stabilization)			apobec-1 complementation factor isoform 36			16055734; 15164054; 15148397; 14702039; 12896982; 12881431; 12477932; 11871661; 11815617; 11752456; 11718896; 11577082; 11571303; 11352648; 11329013; 11134005; 11072063; 10833526; 10781591; 10669792
A_32_P110905	A2LD34	-0.178589	P	642833	757260	LOC87802	NM_033110	NM_033110	NM_033110	A2LD34	chr13:101183916-101183890	GO:0003839(gamma-glutamylcyclotransferase activity)|GO:0016746(transferase activity, transferring acyl groups)|GO:0042219(cellular modified amino acid catabolic process)	Hs.350868	ENST00000455100	Homo sapiens AIG2-like domain 1 (A2LD1), transcript variant 1, mRNA [NM_033110]	hs|13q32.36	THC2610223		AIG2-like domain 34	GCTGTATATCAGAGTGCGTATAGCACCATTCTTCCTAATTTTCAGATCAAGCTTCACAGC	258004		GO:0005554(molecular function unknown)					LOC87769 protein			14702039; 12477965
A_23_P116931	A2M	-0.184031	P	645579	760494	CPAMD5; FWP007; S863-7; alpha 2M; DKFZp779B119	NM_000014	NM_000014	NM_000014	A2M	chr12:009221418-009221392	GO:0001869(negative regulation of complement activation, lectin pathway)|GO:0002576(platelet degranulation)|GO:0004867(serine-type endopeptidase inhibitor activity)|GO:0005515(protein binding)|GO:0005576(extracellular region)|GO:0005615(extracellular space)|GO:0005829(cytosol)|GO:0007264(small GTPase mediated signal transduction)|GO:0007596(blood coagulation)|GO:0007597(blood coagulation, intrins…	Hs.212838	ENST00000540099	Homo sapiens alpha-2-macroglobulin (A2M), mRNA [NM_000014]	hs|12p13.31	NP1352556	GO:0001869(negative regulation of complement activation, lectin pathway)|GO:0004867(serine-type endopeptidase inhibitor activity)|GO:0005576(extracellular region)|GO:0005615(extracellular space)|GO:0006953(acute-phase response)|GO:0007584(response to nutrient)|GO:0010037(response to carbon dioxide)|GO:0019899(enzyme binding)|GO:0019959(interleukin-8 binding)|GO:0019966(interleukin-1 binding)|GO:0…	alpha-2-macroglobulin	CTTGTTCTTCACGGTTCTGCAAGATGTCCCAGTAAGAGATCTGAAACCAGCCATAGTGAA	258644	GO:5576(extracellular region)	GO:19899(enzyme binding); GO:19966(interleukin-1 binding); GO:19959(interleukin-8 binding); GO:8320(protein carrier activity); GO:4867(serine-type endopeptidase inhibitor activity); GO:43120(tumor necrosis factor binding); GO:17114(wide-spectrum protease inhibitor activity)	Alpha-2-macroglobulin is a protease inhibitor and cytokine transporter. It inhibits many proteases, including trypsin, thrombin and collagenase. A2M is implicated in Alzheimer disease (AD) due to its ability to mediate the clearance and degradation of A-beta, the major component of beta-amyloid deposits.	GO:6886(intracellular protein transport); GO:51260(protein homooligomerization)			alpha-2-macroglobulin precursor	Alzheimer disease, susceptibility to; Emphysema due to alpha-2-macroglobulin deficiency	KEGG pathway: Alzheimer's disease 05010; KEGG pathway: Complement and coagulation cascades 04610; Reactome Event:Hemostasis 109615	17071617; 16910174; 16784755; 16641085; 16407218; 16335952; 16297527; 16232083; 15931081; 15910735; 15908432; 15611997; 15511627; 15489334; 15023809; 14760718; 14718574; 14715656; 14678766; 14675603; 14637088; 14506912; 12966032; 12755687; 12755614; 12754519; 12631277; 12477932; 12221172; 12194978; 12175343; 12062545; 12042276; 12015318; 11916201; 11910179; 11901360; 11823454; 11811950; 11435418;…
A_33_P3525296	A2ML34	-0.189473	A	648325	763729		NM_144670	NM_144670	NM_144670	A2ML34	chr12:009027061-009027153	GO:0004867(serine-type endopeptidase inhibitor activity)|GO:0005576(extracellular region)|GO:0005615(extracellular space)|GO:0010466(negative regulation of peptidase activity)|GO:0030414(peptidase inhibitor activity)|GO:0052548(regulation of endopeptidase activity)	Hs.620532	ENST00000541459	Homo sapiens alpha-2-macroglobulin-like 1 (A2ML1), mRNA [NM_144670]	hs|12p13.31	NP1355475	GO:0004867(serine-type endopeptidase inhibitor activity)|GO:0005515(protein binding)|GO:0005576(extracellular region)|GO:0005615(extracellular space)|GO:0052548(regulation of endopeptidase activity)	alpha-2-macroglobulin-like 34	AAAGTGTGCTGGTCACCAACTTGAAACCAGCAACCATCAAGGTCTATGACTACTACCTAC	259285
A_24_P151155	A1BG	-0.194915	A	651071	766964	A1B; ABG; GAB; HYST2477; DKFZp686F1004				A1BG	chr19:058857206-058857181	GO:0003674(molecular_function)|GO:0005576(extracellular region)|GO:0008150(biological_process)	Hs.529161		Homo sapiens cDNA FLJ31639 fis, clone NT2RI2003655, weakly similar to ZINC FINGER PROTEIN 195. [AK056201]	hs|19q13.43	THC2461029		alpha-1-B glycoprotein	GCTAGTGATCTGGTTTACTGCCTTAGTAATATCTAGTTCCTAATATGCCTATGCCTTTTA	259925	GO:5576(extracellular region)	GO:3674(molecular_function)	The protein encoded by this gene is a plasma glycoprotein of unknown function. The protein shows sequence similarity to the variable regions of some immunoglobulin supergene family member proteins.	GO:8150(biological_process)			alpha 1B-glycoprotein			16335952; 15489334; 15461460; 15221005; 14760718; 14702039; 12477932; 8889549; 3610142; 3458201; 2591101
A_33_P3685250	A1BG	-0.200357	P	653817	770198		NM_130786	NM_130786	NM_130786	A1BG	chr19:058858293-058858268	GO:0003674(molecular_function)|GO:0005576(extracellular region)|GO:0008150(biological_process)	Hs.529161	ENST00000263100	Homo sapiens alpha-1-B glycoprotein (A1BG), mRNA [NM_130786]	hs|19q13.43	THC2461029	GO:0003674(molecular_function)|GO:0005576(extracellular region)|GO:0008150(biological_process)	alpha-1-B glycoprotein	TCTCTGGGGGGCTGGAGAAGCCTCCCTCATTCCTCCCAGGAATTAATAAATGTGAAGAGA	260566
A_24_P721733	A1BG-AS35	-0.205799	A	656563	773433	FLJ23603	NR_015380	NR_015380	NR_015380	A1BG-AS35	chr19:058866199-058866292		Hs.709582		Homo sapiens A1BG antisense RNA 1 (non-protein coding) (A1BG-AS1), non-coding RNA [NR_015380]	hs|19q13.43	NP62345423		A1BG antisense RNA 1 (non-protein coding)	AGGGTGTGCACAGAACTCAGAAGTCAGACCACTGAACAGTGACAGAACCTTTCAGCCCAT	261206					FLI_CDNA; oligo capping; fis (full insert sequence)					12477966
A_23_P104258	A1CF	-0.211241	P	659309	776668	ACF; ASP; ACF64; ACF65; MGC163391; RP11-564C4.36	NM_138933	NM_138933	NM_138933	A1CF	chr10:052570857-052570834	GO:0000166(nucleotide binding)|GO:0003676(nucleic acid binding)|GO:0003723(RNA binding)|GO:0003725(double-stranded RNA binding)|GO:0003727(single-stranded RNA binding)|GO:0003729(mRNA binding)|GO:0004131(cytosine deaminase activity)|GO:0005515(protein binding)|GO:0005622(intracellular)|GO:0005634(nucleus)|GO:0005654(nucleoplasm)|GO:0005720(nuclear heterochromatin)|GO:0005737(cytoplasm)|GO:0005783…	Hs.282795	ENST00000395489	Homo sapiens APOBEC1 complementation factor (A1CF), transcript variant 3, mRNA [NM_138933]	hs|10q11.57	NP63279248	GO:0000166(nucleotide binding)|GO:0003725(double-stranded RNA binding)|GO:0003727(single-stranded RNA binding)|GO:0005515(protein binding)|GO:0005634(nucleus)|GO:0005737(cytoplasm)|GO:0005783(endoplasmic reticulum)|GO:0006397(mRNA processing)|GO:0030895(apolipoprotein B mRNA editing enzyme complex)|GO:0050821(protein stabilization)	APOBEC1 complementation factor	GACAGCTATTCTTGTACAAAATAACTATTCCTGCTCTAGCCAGCCAGAATCCTGCAATCC	261847	GO:30895(apolipoprotein B mRNA editing enzyme complex); GO:5737(cytoplasm); GO:5634(nucleus)	GO:3725(double-stranded RNA binding); GO:3676(nucleic acid binding); GO:166(nucleotide binding); GO:5515(protein binding); GO:3727(single-stranded RNA binding)	Mammalian apolipoprotein B mRNA undergoes site-specific C to U deamination, which is mediated by a multi-component enzyme complex containing a minimal core composed of APOBEC-1 and a complementation factor encoded by this gene. The gene product has three non-identical RNA recognition motifs and belongs to the hnRNP R family of RNA-binding proteins. It has been proposed that this complementation f…	GO:6381(mRNA editing); GO:6397(mRNA processing); GO:50821(protein stabilization)			apobec-1 complementation factor isoform 37			16055734; 15164054; 15148397; 14702039; 12896982; 12881431; 12477932; 11871661; 11815617; 11752456; 11718896; 11577082; 11571303; 11352648; 11329013; 11134005; 11072063; 10833526; 10781591; 10669793
A_32_P110906	A2LD35	-0.216683	P	662055	779902	LOC87803	NM_033110	NM_033110	NM_033110	A2LD35	chr13:101183916-101183891	GO:0003839(gamma-glutamylcyclotransferase activity)|GO:0016746(transferase activity, transferring acyl groups)|GO:0042219(cellular modified amino acid catabolic process)	Hs.350868	ENST00000455100	Homo sapiens AIG2-like domain 1 (A2LD1), transcript variant 1, mRNA [NM_033110]	hs|13q32.37	THC2610224		AIG2-like domain 35	GCTGTATATCAGAGTGCGTATAGCACCATTCTTCCTAATTTTCAGATCAAGCTTCACAGC	262487		GO:0005554(molecular function unknown)					LOC87769 protein			14702039; 12477966
A_23_P116932	A2M	-0.222124	P	664801	783137	CPAMD5; FWP007; S863-7; alpha 2M; DKFZp779B120	NM_000014	NM_000014	NM_000014	A2M	chr12:009221418-009221393	GO:0001869(negative regulation of complement activation, lectin pathway)|GO:0002576(platelet degranulation)|GO:0004867(serine-type endopeptidase inhibitor activity)|GO:0005515(protein binding)|GO:0005576(extracellular region)|GO:0005615(extracellular space)|GO:0005829(cytosol)|GO:0007264(small GTPase mediated signal transduction)|GO:0007596(blood coagulation)|GO:0007597(blood coagulation, intrins…	Hs.212838	ENST00000540099	Homo sapiens alpha-2-macroglobulin (A2M), mRNA [NM_000014]	hs|12p13.31	NP1358394	GO:0001869(negative regulation of complement activation, lectin pathway)|GO:0004867(serine-type endopeptidase inhibitor activity)|GO:0005576(extracellular region)|GO:0005615(extracellular space)|GO:0006953(acute-phase response)|GO:0007584(response to nutrient)|GO:0010037(response to carbon dioxide)|GO:0019899(enzyme binding)|GO:0019959(interleukin-8 binding)|GO:0019966(interleukin-1 binding)|GO:0…	alpha-2-macroglobulin	CTTGTTCTTCACGGTTCTGCAAGATGTCCCAGTAAGAGATCTGAAACCAGCCATAGTGAA	263128	GO:5576(extracellular region)	GO:19899(enzyme binding); GO:19966(interleukin-1 binding); GO:19959(interleukin-8 binding); GO:8320(protein carrier activity); GO:4867(serine-type endopeptidase inhibitor activity); GO:43120(tumor necrosis factor binding); GO:17114(wide-spectrum protease inhibitor activity)	Alpha-2-macroglobulin is a protease inhibitor and cytokine transporter. It inhibits many proteases, including trypsin, thrombin and collagenase. A2M is implicated in Alzheimer disease (AD) due to its ability to mediate the clearance and degradation of A-beta, the major component of beta-amyloid deposits.	GO:6886(intracellular protein transport); GO:51260(protein homooligomerization)			alpha-2-macroglobulin precursor	Alzheimer disease, susceptibility to; Emphysema due to alpha-2-macroglobulin deficiency	KEGG pathway: Alzheimer's disease 05010; KEGG pathway: Complement and coagulation cascades 04610; Reactome Event:Hemostasis 109616	17071617; 16910174; 16784755; 16641085; 16407218; 16335952; 16297527; 16232083; 15931081; 15910735; 15908432; 15611997; 15511627; 15489334; 15023809; 14760718; 14718574; 14715656; 14678766; 14675603; 14637088; 14506912; 12966032; 12755687; 12755614; 12754519; 12631277; 12477932; 12221172; 12194978; 12175343; 12062545; 12042276; 12015318; 11916201; 11910179; 11901360; 11823454; 11811950; 11435418;…
A_33_P3525297	A2ML35	-0.227566	A	667547	786372		NM_144670	NM_144670	NM_144670	A2ML35	chr12:009027061-009027154	GO:0004867(serine-type endopeptidase inhibitor activity)|GO:0005576(extracellular region)|GO:0005615(extracellular space)|GO:0010466(negative regulation of peptidase activity)|GO:0030414(peptidase inhibitor activity)|GO:0052548(regulation of endopeptidase activity)	Hs.620532	ENST00000541459	Homo sapiens alpha-2-macroglobulin-like 1 (A2ML1), mRNA [NM_144670]	hs|12p13.31	NP1361313	GO:0004867(serine-type endopeptidase inhibitor activity)|GO:0005515(protein binding)|GO:0005576(extracellular region)|GO:0005615(extracellular space)|GO:0052548(regulation of endopeptidase activity)	alpha-2-macroglobulin-like 35	AAAGTGTGCTGGTCACCAACTTGAAACCAGCAACCATCAAGGTCTATGACTACTACCTAC	263768
A_24_P151156	A1BG	-0.233008	A	670293	789606	A1B; ABG; GAB; HYST2477; DKFZp686F1005				A1BG	chr19:058857206-058857182	GO:0003674(molecular_function)|GO:0005576(extracellular region)|GO:0008150(biological_process)	Hs.529161		Homo sapiens cDNA FLJ31639 fis, clone NT2RI2003655, weakly similar to ZINC FINGER PROTEIN 195. [AK056201]	hs|19q13.43	THC2461029		alpha-1-B glycoprotein	GCTAGTGATCTGGTTTACTGCCTTAGTAATATCTAGTTCCTAATATGCCTATGCCTTTTA	264409	GO:5576(extracellular region)	GO:3674(molecular_function)	The protein encoded by this gene is a plasma glycoprotein of unknown function. The protein shows sequence similarity to the variable regions of some immunoglobulin supergene family member proteins.	GO:8150(biological_process)			alpha 1B-glycoprotein			16335952; 15489334; 15461460; 15221005; 14760718; 14702039; 12477932; 8889549; 3610142; 3458201; 2591102
A_33_P3685251	A1BG	-0.23845	P	673039	792841		NM_130786	NM_130786	NM_130786	A1BG	chr19:058858293-058858269	GO:0003674(molecular_function)|GO:0005576(extracellular region)|GO:0008150(biological_process)	Hs.529161	ENST00000263100	Homo sapiens alpha-1-B glycoprotein (A1BG), mRNA [NM_130786]	hs|19q13.43	THC2461029	GO:0003674(molecular_function)|GO:0005576(extracellular region)|GO:0008150(biological_process)	alpha-1-B glycoprotein	TCTCTGGGGGGCTGGAGAAGCCTCCCTCATTCCTCCCAGGAATTAATAAATGTGAAGAGA	265049
A_24_P721734	A1BG-AS36	-0.243892	A	675785	796076	FLJ23604	NR_015380	NR_015380	NR_015380	A1BG-AS36	chr19:058866199-058866293		Hs.709582		Homo sapiens A1BG antisense RNA 1 (non-protein coding) (A1BG-AS1), non-coding RNA [NR_015380]	hs|19q13.43	NP64213073		A1BG antisense RNA 1 (non-protein coding)	AGGGTGTGCACAGAACTCAGAAGTCAGACCACTGAACAGTGACAGAACCTTTCAGCCCAT	265690					FLI_CDNA; oligo capping; fis (full insert sequence)					12477967
A_23_P104259	A1CF	-0.249334	P	678530	799310	ACF; ASP; ACF64; ACF65; MGC163391; RP11-564C4.37	NM_138933	NM_138933	NM_138933	A1CF	chr10:052570857-052570835	GO:0000166(nucleotide binding)|GO:0003676(nucleic acid binding)|GO:0003723(RNA binding)|GO:0003725(double-stranded RNA binding)|GO:0003727(single-stranded RNA binding)|GO:0003729(mRNA binding)|GO:0004131(cytosine deaminase activity)|GO:0005515(protein binding)|GO:0005622(intracellular)|GO:0005634(nucleus)|GO:0005654(nucleoplasm)|GO:0005720(nuclear heterochromatin)|GO:0005737(cytoplasm)|GO:0005783…	Hs.282795	ENST00000395489	Homo sapiens APOBEC1 complementation factor (A1CF), transcript variant 3, mRNA [NM_138933]	hs|10q11.58	NP65146898	GO:0000166(nucleotide binding)|GO:0003725(double-stranded RNA binding)|GO:0003727(single-stranded RNA binding)|GO:0005515(protein binding)|GO:0005634(nucleus)|GO:0005737(cytoplasm)|GO:0005783(endoplasmic reticulum)|GO:0006397(mRNA processing)|GO:0030895(apolipoprotein B mRNA editing enzyme complex)|GO:0050821(protein stabilization)	APOBEC1 complementation factor	GACAGCTATTCTTGTACAAAATAACTATTCCTGCTCTAGCCAGCCAGAATCCTGCAATCC	266330	GO:30895(apolipoprotein B mRNA editing enzyme complex); GO:5737(cytoplasm); GO:5634(nucleus)	GO:3725(double-stranded RNA binding); GO:3676(nucleic acid binding); GO:166(nucleotide binding); GO:5515(protein binding); GO:3727(single-stranded RNA binding)	Mammalian apolipoprotein B mRNA undergoes site-specific C to U deamination, which is mediated by a multi-component enzyme complex containing a minimal core composed of APOBEC-1 and a complementation factor encoded by this gene. The gene product has three non-identical RNA recognition motifs and belongs to the hnRNP R family of RNA-binding proteins. It has been proposed that this complementation f…	GO:6381(mRNA editing); GO:6397(mRNA processing); GO:50821(protein stabilization)			apobec-1 complementation factor isoform 38			16055734; 15164054; 15148397; 14702039; 12896982; 12881431; 12477932; 11871661; 11815617; 11752456; 11718896; 11577082; 11571303; 11352648; 11329013; 11134005; 11072063; 10833526; 10781591; 10669794
A_32_P110907	A2LD36	-0.254776	P	681276	802545	LOC87804	NM_033110	NM_033110	NM_033110	A2LD36	chr13:101183916-101183892	GO:0003839(gamma-glutamylcyclotransferase activity)|GO:0016746(transferase activity, transferring acyl groups)|GO:0042219(cellular modified amino acid catabolic process)	Hs.350868	ENST00000455100	Homo sapiens AIG2-like domain 1 (A2LD1), transcript variant 1, mRNA [NM_033110]	hs|13q32.38	THC2610225		AIG2-like domain 36	GCTGTATATCAGAGTGCGTATAGCACCATTCTTCCTAATTTTCAGATCAAGCTTCACAGC	266971		GO:0005554(molecular function unknown)					LOC87769 protein			14702039; 12477967
A_23_P116933	A2M	-0.260218	P	684022	805780	CPAMD5; FWP007; S863-7; alpha 2M; DKFZp779B121	NM_000014	NM_000014	NM_000014	A2M	chr12:009221418-009221394	GO:0001869(negative regulation of complement activation, lectin pathway)|GO:0002576(platelet degranulation)|GO:0004867(serine-type endopeptidase inhibitor activity)|GO:0005515(protein binding)|GO:0005576(extracellular region)|GO:0005615(extracellular space)|GO:0005829(cytosol)|GO:0007264(small GTPase mediated signal transduction)|GO:0007596(blood coagulation)|GO:0007597(blood coagulation, intrins…	Hs.212838	ENST00000540099	Homo sapiens alpha-2-macroglobulin (A2M), mRNA [NM_000014]	hs|12p13.31	NP1364232	GO:0001869(negative regulation of complement activation, lectin pathway)|GO:0004867(serine-type endopeptidase inhibitor activity)|GO:0005576(extracellular region)|GO:0005615(extracellular space)|GO:0006953(acute-phase response)|GO:0007584(response to nutrient)|GO:0010037(response to carbon dioxide)|GO:0019899(enzyme binding)|GO:0019959(interleukin-8 binding)|GO:0019966(interleukin-1 binding)|GO:0…	alpha-2-macroglobulin	CTTGTTCTTCACGGTTCTGCAAGATGTCCCAGTAAGAGATCTGAAACCAGCCATAGTGAA	267611	GO:5576(extracellular region)	GO:19899(enzyme binding); GO:19966(interleukin-1 binding); GO:19959(interleukin-8 binding); GO:8320(protein carrier activity); GO:4867(serine-type endopeptidase inhibitor activity); GO:43120(tumor necrosis factor binding); GO:17114(wide-spectrum protease inhibitor activity)	Alpha-2-macroglobulin is a protease inhibitor and cytokine transporter. It inhibits many proteases, including trypsin, thrombin and collagenase. A2M is implicated in Alzheimer disease (AD) due to its ability to mediate the clearance and degradation of A-beta, the major component of beta-amyloid deposits.	GO:6886(intracellular protein transport); GO:51260(protein homooligomerization)			alpha-2-macroglobulin precursor	Alzheimer disease, susceptibility to; Emphysema due to alpha-2-macroglobulin deficiency	KEGG pathway: Alzheimer's disease 05010; KEGG pathway: Complement and coagulation cascades 04610; Reactome Event:Hemostasis 109617	17071617; 16910174; 16784755; 16641085; 16407218; 16335952; 16297527; 16232083; 15931081; 15910735; 15908432; 15611997; 15511627; 15489334; 15023809; 14760718; 14718574; 14715656; 14678766; 14675603; 14637088; 14506912; 12966032; 12755687; 12755614; 12754519; 12631277; 12477932; 12221172; 12194978; 12175343; 12062545; 12042276; 12015318; 11916201; 11910179; 11901360; 11823454; 11811950; 11435418;…
A_33_P3525298	A2ML36	-0.265659	A	686768	809014		NM_144670	NM_144670	NM_144670	A2ML36	chr12:009027061-009027155	GO:0004867(serine-type endopeptidase inhibitor activity)|GO:0005576(extracellular region)|GO:0005615(extracellular space)|GO:0010466(negative regulation of peptidase activity)|GO:0030414(peptidase inhibitor activity)|GO:0052548(regulation of endopeptidase activity)	Hs.620532	ENST00000541459	Homo sapiens alpha-2-macroglobulin-like 1 (A2ML1), mRNA [NM_144670]	hs|12p13.31	NP1367151	GO:0004867(serine-type endopeptidase inhibitor activity)|GO:0005515(protein binding)|GO:0005576(extracellular region)|GO:0005615(extracellular space)|GO:0052548(regulation of endopeptidase activity)	alpha-2-macroglobulin-like 36	AAAGTGTGCTGGTCACCAACTTGAAACCAGCAACCATCAAGGTCTATGACTACTACCTAC	268252
A_24_P151157	A1BG	-0.271101	A	689514	812249	A1B; ABG; GAB; HYST2477; DKFZp686F1006				A1BG	chr19:058857206-058857183	GO:0003674(molecular_function)|GO:0005576(extracellular region)|GO:0008150(biological_process)	Hs.529161		Homo sapiens cDNA FLJ31639 fis, clone NT2RI2003655, weakly similar to ZINC FINGER PROTEIN 195. [AK056201]	hs|19q13.43	THC2461029		alpha-1-B glycoprotein	GCTAGTGATCTGGTTTACTGCCTTAGTAATATCTAGTTCCTAATATGCCTATGCCTTTTA	268892	GO:5576(extracellular region)	GO:3674(molecular_function)	The protein encoded by this gene is a plasma glycoprotein of unknown function. The protein shows sequence similarity to the variable regions of some immunoglobulin supergene family member proteins.	GO:8150(biological_process)			alpha 1B-glycoprotein			16335952; 15489334; 15461460; 15221005; 14760718; 14702039; 12477932; 8889549; 3610142; 3458201; 2591103
A_33_P3685252	A1BG	-0.276543	P	692260	815484		NM_130786	NM_130786	NM_130786	A1BG	chr19:058858293-058858270	GO:0003674(molecular_function)|GO:0005576(extracellular region)|GO:0008150(biological_process)	Hs.529161	ENST00000263100	Homo sapiens alpha-1-B glycoprotein (A1BG), mRNA [NM_130786]	hs|19q13.43	THC2461029	GO:0003674(molecular_function)|GO:0005576(extracellular region)|GO:0008150(biological_process)	alpha-1-B glycoprotein	TCTCTGGGGGGCTGGAGAAGCCTCCCTCATTCCTCCCAGGAATTAATAAATGTGAAGAGA	269533
A_24_P721735	A1BG-AS37	-0.281985	A	695006	818718	FLJ23605	NR_015380	NR_015380	NR_015380	A1BG-AS37	chr19:058866199-058866294		Hs.709582		Homo sapiens A1BG antisense RNA 1 (non-protein coding) (A1BG-AS1), non-coding RNA [NR_015380]	hs|19q13.43	NP66080723		A1BG antisense RNA 1 (non-protein coding)	AGGGTGTGCACAGAACTCAGAAGTCAGACCACTGAACAGTGACAGAACCTTTCAGCCCAT	270173					FLI_CDNA; oligo capping; fis (full insert sequence)					12477968
A_23_P104260	A1CF	-0.287427	P	697752	821953	ACF; ASP; ACF64; ACF65; MGC163391; RP11-564C4.38	NM_138933	NM_138933	NM_138933	A1CF	chr10:052570857-052570836	GO:0000166(nucleotide binding)|GO:0003676(nucleic acid binding)|GO:0003723(RNA binding)|GO:0003725(double-stranded RNA binding)|GO:0003727(single-stranded RNA binding)|GO:0003729(mRNA binding)|GO:0004131(cytosine deaminase activity)|GO:0005515(protein binding)|GO:0005622(intracellular)|GO:0005634(nucleus)|GO:0005654(nucleoplasm)|GO:0005720(nuclear heterochromatin)|GO:0005737(cytoplasm)|GO:0005783…	Hs.282795	ENST00000395489	Homo sapiens APOBEC1 complementation factor (A1CF), transcript variant 3, mRNA [NM_138933]	hs|10q11.59	NP67014548	GO:0000166(nucleotide binding)|GO:0003725(double-stranded RNA binding)|GO:0003727(single-stranded RNA binding)|GO:0005515(protein binding)|GO:0005634(nucleus)|GO:0005737(cytoplasm)|GO:0005783(endoplasmic reticulum)|GO:0006397(mRNA processing)|GO:0030895(apolipoprotein B mRNA editing enzyme complex)|GO:0050821(protein stabilization)	APOBEC1 complementation factor	GACAGCTATTCTTGTACAAAATAACTATTCCTGCTCTAGCCAGCCAGAATCCTGCAATCC	270814	GO:30895(apolipoprotein B mRNA editing enzyme complex); GO:5737(cytoplasm); GO:5634(nucleus)	GO:3725(double-stranded RNA binding); GO:3676(nucleic acid binding); GO:166(nucleotide binding); GO:5515(protein binding); GO:3727(single-stranded RNA binding)	Mammalian apolipoprotein B mRNA undergoes site-specific C to U deamination, which is mediated by a multi-component enzyme complex containing a minimal core composed of APOBEC-1 and a complementation factor encoded by this gene. The gene product has three non-identical RNA recognition motifs and belongs to the hnRNP R family of RNA-binding proteins. It has been proposed that this complementation f…	GO:6381(mRNA editing); GO:6397(mRNA processing); GO:50821(protein stabilization)			apobec-1 complementation factor isoform 39			16055734; 15164054; 15148397; 14702039; 12896982; 12881431; 12477932; 11871661; 11815617; 11752456; 11718896; 11577082; 11571303; 11352648; 11329013; 11134005; 11072063; 10833526; 10781591; 10669795
A_32_P110908	A2LD37	-0.292869	P	700498	825187	LOC87805	NM_033110	NM_033110	NM_033110	A2LD37	chr13:101183916-101183893	GO:0003839(gamma-glutamylcyclotransferase activity)|GO:0016746(transferase activity, transferring acyl groups)|GO:0042219(cellular modified amino acid catabolic process)	Hs.350868	ENST00000455100	Homo sapiens AIG2-like domain 1 (A2LD1), transcript variant 1, mRNA [NM_033110]	hs|13q32.39	THC2610226		AIG2-like domain 37	GCTGTATATCAGAGTGCGTATAGCACCATTCTTCCTAATTTTCAGATCAAGCTTCACAGC	271454		GO:0005554(molecular function unknown)					LOC87769 protein			14702039; 12477968
A_23_P116934	A2M	-0.298311	P	703244	828422	CPAMD5; FWP007; S863-7; alpha 2M; DKFZp779B122	NM_000014	NM_000014	NM_000014	A2M	chr12:009221418-009221395	GO:0001869(negative regulation of complement activation, lectin pathway)|GO:0002576(platelet degranulation)|GO:0004867(serine-type endopeptidase inhibitor activity)|GO:0005515(protein binding)|GO:0005576(extracellular region)|GO:0005615(extracellular space)|GO:0005829(cytosol)|GO:0007264(small GTPase mediated signal transduction)|GO:0007596(blood coagulation)|GO:0007597(blood coagulation, intrins…	Hs.212838	ENST00000540099	Homo sapiens alpha-2-macroglobulin (A2M), mRNA [NM_000014]	hs|12p13.31	NP1370070	GO:0001869(negative regulation of complement activation, lectin pathway)|GO:0004867(serine-type endopeptidase inhibitor activity)|GO:0005576(extracellular region)|GO:0005615(extracellular space)|GO:0006953(acute-phase response)|GO:0007584(response to nutrient)|GO:0010037(response to carbon dioxide)|GO:0019899(enzyme binding)|GO:0019959(interleukin-8 binding)|GO:0019966(interleukin-1 binding)|GO:0…	alpha-2-macroglobulin	CTTGTTCTTCACGGTTCTGCAAGATGTCCCAGTAAGAGATCTGAAACCAGCCATAGTGAA	272095	GO:5576(extracellular region)	GO:19899(enzyme binding); GO:19966(interleukin-1 binding); GO:19959(interleukin-8 binding); GO:8320(protein carrier activity); GO:4867(serine-type endopeptidase inhibitor activity); GO:43120(tumor necrosis factor binding); GO:17114(wide-spectrum protease inhibitor activity)	Alpha-2-macroglobulin is a protease inhibitor and cytokine transporter. It inhibits many proteases, including trypsin, thrombin and collagenase. A2M is implicated in Alzheimer disease (AD) due to its ability to mediate the clearance and degradation of A-beta, the major component of beta-amyloid deposits.	GO:6886(intracellular protein transport); GO:51260(protein homooligomerization)			alpha-2-macroglobulin precursor	Alzheimer disease, susceptibility to; Emphysema due to alpha-2-macroglobulin deficiency	KEGG pathway: Alzheimer's disease 05010; KEGG pathway: Complement and coagulation cascades 04610; Reactome Event:Hemostasis 109618	17071617; 16910174; 16784755; 16641085; 16407218; 16335952; 16297527; 16232083; 15931081; 15910735; 15908432; 15611997; 15511627; 15489334; 15023809; 14760718; 14718574; 14715656; 14678766; 14675603; 14637088; 14506912; 12966032; 12755687; 12755614; 12754519; 12631277; 12477932; 12221172; 12194978; 12175343; 12062545; 12042276; 12015318; 11916201; 11910179; 11901360; 11823454; 11811950; 11435418;…
A_33_P3525299	A2ML37	-0.303753	A	705990	831657		NM_144670	NM_144670	NM_144670	A2ML37	chr12:009027061-009027156	GO:0004867(serine-type endopeptidase inhibitor activity)|GO:0005576(extracellular region)|GO:0005615(extracellular space)|GO:0010466(negative regulation of peptidase activity)|GO:0030414(peptidase inhibitor activity)|GO:0052548(regulation of endopeptidase activity)	Hs.620532	ENST00000541459	Homo sapiens alpha-2-macroglobulin-like 1 (A2ML1), mRNA [NM_144670]	hs|12p13.31	NP1372989	GO:0004867(serine-type endopeptidase inhibitor activity)|GO:0005515(protein binding)|GO:0005576(extracellular region)|GO:0005615(extracellular space)|GO:0052548(regulation of endopeptidase activity)	alpha-2-macroglobulin-like 37	AAAGTGTGCTGGTCACCAACTTGAAACCAGCAACCATCAAGGTCTATGACTACTACCTAC	272735
A_24_P151158	A1BG	-0.309194	A	708736	834891	A1B; ABG; GAB; HYST2477; DKFZp686F1007				A1BG	chr19:058857206-058857184	GO:0003674(molecular_function)|GO:0005576(extracellular region)|GO:0008150(biological_process)	Hs.529161		Homo sapiens cDNA FLJ31639 fis, clone NT2RI2003655, weakly similar to ZINC FINGER PROTEIN 195. [AK056201]	hs|19q13.43	THC2461029		alpha-1-B glycoprotein	GCTAGTGATCTGGTTTACTGCCTTAGTAATATCTAGTTCCTAATATGCCTATGCCTTTTA	273376	GO:5576(extracellular region)	GO:3674(molecular_function)	The protein encoded by this gene is a plasma glycoprotein of unknown function. The protein shows sequence similarity to the variable regions of some immunoglobulin supergene family member proteins.	GO:8150(biological_process)			alpha 1B-glycoprotein			16335952; 15489334; 15461460; 15221005; 14760718; 14702039; 12477932; 8889549; 3610142; 3458201; 2591104
A_33_P3685253	A1BG	-0.314636	P	711482	838126		NM_130786	NM_130786	NM_130786	A1BG	chr19:058858293-058858271	GO:0003674(molecular_function)|GO:0005576(extracellular region)|GO:0008150(biological_process)	Hs.529161	ENST00000263100	Homo sapiens alpha-1-B glycoprotein (A1BG), mRNA [NM_130786]	hs|19q13.43	THC2461029	GO:0003674(molecular_function)|GO:0005576(extracellular region)|GO:0008150(biological_process)	alpha-1-B glycoprotein	TCTCTGGGGGGCTGGAGAAGCCTCCCTCATTCCTCCCAGGAATTAATAAATGTGAAGAGA	274016
A_24_P721736	A1BG-AS38	-0.320078	A	714228	841361	FLJ23606	NR_015380	NR_015380	NR_015380	A1BG-AS38	chr19:058866199-058866295		Hs.709582		Homo sapiens A1BG antisense RNA 1 (non-protein coding) (A1BG-AS1), non-coding RNA [NR_015380]	hs|19q13.43	NP67948373		A1BG antisense RNA 1 (non-protein coding)	AGGGTGTGCACAGAACTCAGAAGTCAGACCACTGAACAGTGACAGAACCTTTCAGCCCAT	274657					FLI_CDNA; oligo capping; fis (full insert sequence)					12477969
A_23_P104261	A1CF	-0.32552	P	716974	844595	ACF; ASP; ACF64; ACF65; MGC163391; RP11-564C4.39	NM_138933	NM_138933	NM_138933	A1CF	chr10:052570857-052570837	GO:0000166(nucleotide binding)|GO:0003676(nucleic acid binding)|GO:0003723(RNA binding)|GO:0003725(double-stranded RNA binding)|GO:0003727(single-stranded RNA binding)|GO:0003729(mRNA binding)|GO:0004131(cytosine deaminase activity)|GO:0005515(protein binding)|GO:0005622(intracellular)|GO:0005634(nucleus)|GO:0005654(nucleoplasm)|GO:0005720(nuclear heterochromatin)|GO:0005737(cytoplasm)|GO:0005783…	Hs.282795	ENST00000395489	Homo sapiens APOBEC1 complementation factor (A1CF), transcript variant 3, mRNA [NM_138933]	hs|10q11.60	NP68882198	GO:0000166(nucleotide binding)|GO:0003725(double-stranded RNA binding)|GO:0003727(single-stranded RNA binding)|GO:0005515(protein binding)|GO:0005634(nucleus)|GO:0005737(cytoplasm)|GO:0005783(endoplasmic reticulum)|GO:0006397(mRNA processing)|GO:0030895(apolipoprotein B mRNA editing enzyme complex)|GO:0050821(protein stabilization)	APOBEC1 complementation factor	GACAGCTATTCTTGTACAAAATAACTATTCCTGCTCTAGCCAGCCAGAATCCTGCAATCC	275297	GO:30895(apolipoprotein B mRNA editing enzyme complex); GO:5737(cytoplasm); GO:5634(nucleus)	GO:3725(double-stranded RNA binding); GO:3676(nucleic acid binding); GO:166(nucleotide binding); GO:5515(protein binding); GO:3727(single-stranded RNA binding)	Mammalian apolipoprotein B mRNA undergoes site-specific C to U deamination, which is mediated by a multi-component enzyme complex containing a minimal core composed of APOBEC-1 and a complementation factor encoded by this gene. The gene product has three non-identical RNA recognition motifs and belongs to the hnRNP R family of RNA-binding proteins. It has been proposed that this complementation f…	GO:6381(mRNA editing); GO:6397(mRNA processing); GO:50821(protein stabilization)			apobec-1 complementation factor isoform 40			16055734; 15164054; 15148397; 14702039; 12896982; 12881431; 12477932; 11871661; 11815617; 11752456; 11718896; 11577082; 11571303; 11352648; 11329013; 11134005; 11072063; 10833526; 10781591; 10669796
A_32_P110909	A2LD38	-0.330962	P	719719	847830	LOC87806	NM_033110	NM_033110	NM_033110	A2LD38	chr13:101183916-101183894	GO:0003839(gamma-glutamylcyclotransferase activity)|GO:0016746(transferase activity, transferring acyl groups)|GO:0042219(cellular modified amino acid catabolic process)	Hs.350868	ENST00000455100	Homo sapiens AIG2-like domain 1 (A2LD1), transcript variant 1, mRNA [NM_033110]	hs|13q32.40	THC2610227		AIG2-like domain 38	GCTGTATATCAGAGTGCGTATAGCACCATTCTTCCTAATTTTCAGATCAAGCTTCACAGC	275938		GO:0005554(molecular function unknown)					LOC87769 protein			14702039; 12477969
A_23_P116935	A2M	-0.336404	P	722465	851065	CPAMD5; FWP007; S863-7; alpha 2M; DKFZp779B123	NM_000014	NM_000014	NM_000014	A2M	chr12:009221418-009221396	GO:0001869(negative regulation of complement activation, lectin pathway)|GO:0002576(platelet degranulation)|GO:0004867(serine-type endopeptidase inhibitor activity)|GO:0005515(protein binding)|GO:0005576(extracellular region)|GO:0005615(extracellular space)|GO:0005829(cytosol)|GO:0007264(small GTPase mediated signal transduction)|GO:0007596(blood coagulation)|GO:0007597(blood coagulation, intrins…	Hs.212838	ENST00000540099	Homo sapiens alpha-2-macroglobulin (A2M), mRNA [NM_000014]	hs|12p13.31	NP1375908	GO:0001869(negative regulation of complement activation, lectin pathway)|GO:0004867(serine-type endopeptidase inhibitor activity)|GO:0005576(extracellular region)|GO:0005615(extracellular space)|GO:0006953(acute-phase response)|GO:0007584(response to nutrient)|GO:0010037(response to carbon dioxide)|GO:0019899(enzyme binding)|GO:0019959(interleukin-8 binding)|GO:0019966(interleukin-1 binding)|GO:0…	alpha-2-macroglobulin	CTTGTTCTTCACGGTTCTGCAAGATGTCCCAGTAAGAGATCTGAAACCAGCCATAGTGAA	276578	GO:5576(extracellular region)	GO:19899(enzyme binding); GO:19966(interleukin-1 binding); GO:19959(interleukin-8 binding); GO:8320(protein carrier activity); GO:4867(serine-type endopeptidase inhibitor activity); GO:43120(tumor necrosis factor binding); GO:17114(wide-spectrum protease inhibitor activity)	Alpha-2-macroglobulin is a protease inhibitor and cytokine transporter. It inhibits many proteases, including trypsin, thrombin and collagenase. A2M is implicated in Alzheimer disease (AD) due to its ability to mediate the clearance and degradation of A-beta, the major component of beta-amyloid deposits.	GO:6886(intracellular protein transport); GO:51260(protein homooligomerization)			alpha-2-macroglobulin precursor	Alzheimer disease, susceptibility to; Emphysema due to alpha-2-macroglobulin deficiency	KEGG pathway: Alzheimer's disease 05010; KEGG pathway: Complement and coagulation cascades 04610; Reactome Event:Hemostasis 109619	17071617; 16910174; 16784755; 16641085; 16407218; 16335952; 16297527; 16232083; 15931081; 15910735; 15908432; 15611997; 15511627; 15489334; 15023809; 14760718; 14718574; 14715656; 14678766; 14675603; 14637088; 14506912; 12966032; 12755687; 12755614; 12754519; 12631277; 12477932; 12221172; 12194978; 12175343; 12062545; 12042276; 12015318; 11916201; 11910179; 11901360; 11823454; 11811950; 11435418;…
A_33_P3525300	A2ML38	-0.341846	A	725211	854299		NM_144670	NM_144670	NM_144670	A2ML38	chr12:009027061-009027157	GO:0004867(serine-type endopeptidase inhibitor activity)|GO:0005576(extracellular region)|GO:0005615(extracellular space)|GO:0010466(negative regulation of peptidase activity)|GO:0030414(peptidase inhibitor activity)|GO:0052548(regulation of endopeptidase activity)	Hs.620532	ENST00000541459	Homo sapiens alpha-2-macroglobulin-like 1 (A2ML1), mRNA [NM_144670]	hs|12p13.31	NP1378827	GO:0004867(serine-type endopeptidase inhibitor activity)|GO:0005515(protein binding)|GO:0005576(extracellular region)|GO:0005615(extracellular space)|GO:0052548(regulation of endopeptidase activity)	alpha-2-macroglobulin-like 38	AAAGTGTGCTGGTCACCAACTTGAAACCAGCAACCATCAAGGTCTATGACTACTACCTAC	277219
A_24_P151159	A1BG	-0.347288	A	727957	857534	A1B; ABG; GAB; HYST2477; DKFZp686F1008				A1BG	chr19:058857206-058857185	GO:0003674(molecular_function)|GO:0005576(extracellular region)|GO:0008150(biological_process)	Hs.529161		Homo sapiens cDNA FLJ31639 fis, clone NT2RI2003655, weakly similar to ZINC FINGER PROTEIN 195. [AK056201]	hs|19q13.43	THC2461029		alpha-1-B glycoprotein	GCTAGTGATCTGGTTTACTGCCTTAGTAATATCTAGTTCCTAATATGCCTATGCCTTTTA	277859	GO:5576(extracellular region)	GO:3674(molecular_function)	The protein encoded by this gene is a plasma glycoprotein of unknown function. The protein shows sequence similarity to the variable regions of some immunoglobulin supergene family member proteins.	GO:8150(biological_process)			alpha 1B-glycoprotein			16335952; 15489334; 15461460; 15221005; 14760718; 14702039; 12477932; 8889549; 3610142; 3458201; 2591105
A_33_P3685254	A1BG	-0.352729	P	730703	860769		NM_130786	NM_130786	NM_130786	A1BG	chr19:058858293-058858272	GO:0003674(molecular_function)|GO:0005576(extracellular region)|GO:0008150(biological_process)	Hs.529161	ENST00000263100	Homo sapiens alpha-1-B glycoprotein (A1BG), mRNA [NM_130786]	hs|19q13.43	THC2461029	GO:0003674(molecular_function)|GO:0005576(extracellular region)|GO:0008150(biological_process)	alpha-1-B glycoprotein	TCTCTGGGGGGCTGGAGAAGCCTCCCTCATTCCTCCCAGGAATTAATAAATGTGAAGAGA	278500
A_24_P721737	A1BG-AS39	-0.358171	A	733449	864003	FLJ23607	NR_015380	NR_015380	NR_015380	A1BG-AS39	chr19:058866199-058866296		Hs.709582		Homo sapiens A1BG antisense RNA 1 (non-protein coding) (A1BG-AS1), non-coding RNA [NR_015380]	hs|19q13.43	NP69816023		A1BG antisense RNA 1 (non-protein coding)	AGGGTGTGCACAGAACTCAGAAGTCAGACCACTGAACAGTGACAGAACCTTTCAGCCCAT	279140					FLI_CDNA; oligo capping; fis (full insert sequence)					12477970
A_23_P104262	A1CF	-0.363613	P	736195	867238	ACF; ASP; ACF64; ACF65; MGC163391; RP11-564C4.40	NM_138933	NM_138933	NM_138933	A1CF	chr10:052570857-052570838	GO:0000166(nucleotide binding)|GO:0003676(nucleic acid binding)|GO:0003723(RNA binding)|GO:0003725(double-stranded RNA binding)|GO:0003727(single-stranded RNA binding)|GO:0003729(mRNA binding)|GO:0004131(cytosine deaminase activity)|GO:0005515(protein binding)|GO:0005622(intracellular)|GO:0005634(nucleus)|GO:0005654(nucleoplasm)|GO:0005720(nuclear heterochromatin)|GO:0005737(cytoplasm)|GO:0005783…	Hs.282795	ENST00000395489	Homo sapiens APOBEC1 complementation factor (A1CF), transcript variant 3, mRNA [NM_138933]	hs|10q11.61	NP70749848	GO:0000166(nucleotide binding)|GO:0003725(double-stranded RNA binding)|GO:0003727(single-stranded RNA binding)|GO:0005515(protein binding)|GO:0005634(nucleus)|GO:0005737(cytoplasm)|GO:0005783(endoplasmic reticulum)|GO:0006397(mRNA processing)|GO:0030895(apolipoprotein B mRNA editing enzyme complex)|GO:0050821(protein stabilization)	APOBEC1 complementation factor	GACAGCTATTCTTGTACAAAATAACTATTCCTGCTCTAGCCAGCCAGAATCCTGCAATCC	279781	GO:30895(apolipoprotein B mRNA editing enzyme complex); GO:5737(cytoplasm); GO:5634(nucleus)	GO:3725(double-stranded RNA binding); GO:3676(nucleic acid binding); GO:166(nucleotide binding); GO:5515(protein binding); GO:3727(single-stranded RNA binding)	Mammalian apolipoprotein B mRNA undergoes site-specific C to U deamination, which is mediated by a multi-component enzyme complex containing a minimal core composed of APOBEC-1 and a complementation factor encoded by this gene. The gene product has three non-identical RNA recognition motifs and belongs to the hnRNP R family of RNA-binding proteins. It has been proposed that this complementation f…	GO:6381(mRNA editing); GO:6397(mRNA processing); GO:50821(protein stabilization)			apobec-1 complementation factor isoform 41			16055734; 15164054; 15148397; 14702039; 12896982; 12881431; 12477932; 11871661; 11815617; 11752456; 11718896; 11577082; 11571303; 11352648; 11329013; 11134005; 11072063; 10833526; 10781591; 10669797
A_32_P110910	A2LD39	-0.369055	P	738941	870473	LOC87807	NM_033110	NM_033110	NM_033110	A2LD39	chr13:101183916-101183895	GO:0003839(gamma-glutamylcyclotransferase activity)|GO:0016746(transferase activity, transferring acyl groups)|GO:0042219(cellular modified amino acid catabolic process)	Hs.350868	ENST00000455100	Homo sapiens AIG2-like domain 1 (A2LD1), transcript variant 1, mRNA [NM_033110]	hs|13q32.41	THC2610228		AIG2-like domain 39	GCTGTATATCAGAGTGCGTATAGCACCATTCTTCCTAATTTTCAGATCAAGCTTCACAGC	280421		GO:0005554(molecular function unknown)					LOC87769 protein			14702039; 12477970
A_23_P116936	A2M	-0.374497	P	741687	873707	CPAMD5; FWP007; S863-7; alpha 2M; DKFZp779B124	NM_000014	NM_000014	NM_000014	A2M	chr12:009221418-009221397	GO:0001869(negative regulation of complement activation, lectin pathway)|GO:0002576(platelet degranulation)|GO:0004867(serine-type endopeptidase inhibitor activity)|GO:0005515(protein binding)|GO:0005576(extracellular region)|GO:0005615(extracellular space)|GO:0005829(cytosol)|GO:0007264(small GTPase mediated signal transduction)|GO:0007596(blood coagulation)|GO:0007597(blood coagulation, intrins…	Hs.212838	ENST00000540099	Homo sapiens alpha-2-macroglobulin (A2M), mRNA [NM_000014]	hs|12p13.31	NP1381746	GO:0001869(negative regulation of complement activation, lectin pathway)|GO:0004867(serine-type endopeptidase inhibitor activity)|GO:0005576(extracellular region)|GO:0005615(extracellular space)|GO:0006953(acute-phase response)|GO:0007584(response to nutrient)|GO:0010037(response to carbon dioxide)|GO:0019899(enzyme binding)|GO:0019959(interleukin-8 binding)|GO:0019966(interleukin-1 binding)|GO:0…	alpha-2-macroglobulin	CTTGTTCTTCACGGTTCTGCAAGATGTCCCAGTAAGAGATCTGAAACCAGCCATAGTGAA	281062	GO:5576(extracellular region)	GO:19899(enzyme binding); GO:19966(interleukin-1 binding); GO:19959(interleukin-8 binding); GO:8320(protein carrier activity); GO:4867(serine-type endopeptidase inhibitor activity); GO:43120(tumor necrosis factor binding); GO:17114(wide-spectrum protease inhibitor activity)	Alpha-2-macroglobulin is a protease inhibitor and cytokine transporter. It inhibits many proteases, including trypsin, thrombin and collagenase. A2M is implicated in Alzheimer disease (AD) due to its ability to mediate the clearance and degradation of A-beta, the major component of beta-amyloid deposits.	GO:6886(intracellular protein transport); GO:51260(protein homooligomerization)			alpha-2-macroglobulin precursor	Alzheimer disease, susceptibility to; Emphysema due to alpha-2-macroglobulin deficiency	KEGG pathway: Alzheimer's disease 05010; KEGG pathway: Complement and coagulation cascades 04610; Reactome Event:Hemostasis 109620	17071617; 16910174; 16784755; 16641085; 16407218; 16335952; 16297527; 16232083; 15931081; 15910735; 15908432; 15611997; 15511627; 15489334; 15023809; 14760718; 14718574; 14715656; 14678766; 14675603; 14637088; 14506912; 12966032; 12755687; 12755614; 12754519; 12631277; 12477932; 12221172; 12194978; 12175343; 12062545; 12042276; 12015318; 11916201; 11910179; 11901360; 11823454; 11811950; 11435418;…
A_33_P3525301	A2ML39	-0.379939	A	744433	876942		NM_144670	NM_144670	NM_144670	A2ML39	chr12:009027061-009027158	GO:0004867(serine-type endopeptidase inhibitor activity)|GO:0005576(extracellular region)|GO:0005615(extracellular space)|GO:0010466(negative regulation of peptidase activity)|GO:0030414(peptidase inhibitor activity)|GO:0052548(regulation of endopeptidase activity)	Hs.620532	ENST00000541459	Homo sapiens alpha-2-macroglobulin-like 1 (A2ML1), mRNA [NM_144670]	hs|12p13.31	NP1384665	GO:0004867(serine-type endopeptidase inhibitor activity)|GO:0005515(protein binding)|GO:0005576(extracellular region)|GO:0005615(extracellular space)|GO:0052548(regulation of endopeptidase activity)	alpha-2-macroglobulin-like 39	AAAGTGTGCTGGTCACCAACTTGAAACCAGCAACCATCAAGGTCTATGACTACTACCTAC	281702
A_24_P151160	A1BG	-0.385381	A	747179	880177	A1B; ABG; GAB; HYST2477; DKFZp686F1009				A1BG	chr19:058857206-058857186	GO:0003674(molecular_function)|GO:0005576(extracellular region)|GO:0008150(biological_process)	Hs.529161		Homo sapiens cDNA FLJ31639 fis, clone NT2RI2003655, weakly similar to ZINC FINGER PROTEIN 195. [AK056201]	hs|19q13.43	THC2461029		alpha-1-B glycoprotein	GCTAGTGATCTGGTTTACTGCCTTAGTAATATCTAGTTCCTAATATGCCTATGCCTTTTA	282343	GO:5576(extracellular region)	GO:3674(molecular_function)	The protein encoded by this gene is a plasma glycoprotein of unknown function. The protein shows sequence similarity to the variable regions of some immunoglobulin supergene family member proteins.	GO:8150(biological_process)			alpha 1B-glycoprotein			16335952; 15489334; 15461460; 15221005; 14760718; 14702039; 12477932; 8889549; 3610142; 3458201; 2591106
A_33_P3685255	A1BG	-0.390823	P	749925	883411		NM_130786	NM_130786	NM_130786	A1BG	chr19:058858293-058858273	GO:0003674(molecular_function)|GO:0005576(extracellular region)|GO:0008150(biological_process)	Hs.529161	ENST00000263100	Homo sapiens alpha-1-B glycoprotein (A1BG), mRNA [NM_130786]	hs|19q13.43	THC2461029	GO:0003674(molecular_function)|GO:0005576(extracellular region)|GO:0008150(biological_process)	alpha-1-B glycoprotein	TCTCTGGGGGGCTGGAGAAGCCTCCCTCATTCCTCCCAGGAATTAATAAATGTGAAGAGA	282983
A_24_P721738	A1BG-AS40	-0.396264	A	752671	886646	FLJ23608	NR_015380	NR_015380	NR_015380	A1BG-AS40	chr19:058866199-058866297		Hs.709582		Homo sapiens A1BG antisense RNA 1 (non-protein coding) (A1BG-AS1), non-coding RNA [NR_015380]	hs|19q13.43	NP71683673		A1BG antisense RNA 1 (non-protein coding)	AGGGTGTGCACAGAACTCAGAAGTCAGACCACTGAACAGTGACAGAACCTTTCAGCCCAT	283624					FLI_CDNA; oligo capping; fis (full insert sequence)					12477971
A_23_P104263	A1CF	-0.401706	P	755417	889881	ACF; ASP; ACF64; ACF65; MGC163391; RP11-564C4.41	NM_138933	NM_138933	NM_138933	A1CF	chr10:052570857-052570839	GO:0000166(nucleotide binding)|GO:0003676(nucleic acid binding)|GO:0003723(RNA binding)|GO:0003725(double-stranded RNA binding)|GO:0003727(single-stranded RNA binding)|GO:0003729(mRNA binding)|GO:0004131(cytosine deaminase activity)|GO:0005515(protein binding)|GO:0005622(intracellular)|GO:0005634(nucleus)|GO:0005654(nucleoplasm)|GO:0005720(nuclear heterochromatin)|GO:0005737(cytoplasm)|GO:0005783…	Hs.282795	ENST00000395489	Homo sapiens APOBEC1 complementation factor (A1CF), transcript variant 3, mRNA [NM_138933]	hs|10q11.62	NP72617498	GO:0000166(nucleotide binding)|GO:0003725(double-stranded RNA binding)|GO:0003727(single-stranded RNA binding)|GO:0005515(protein binding)|GO:0005634(nucleus)|GO:0005737(cytoplasm)|GO:0005783(endoplasmic reticulum)|GO:0006397(mRNA processing)|GO:0030895(apolipoprotein B mRNA editing enzyme complex)|GO:0050821(protein stabilization)	APOBEC1 complementation factor	GACAGCTATTCTTGTACAAAATAACTATTCCTGCTCTAGCCAGCCAGAATCCTGCAATCC	284264	GO:30895(apolipoprotein B mRNA editing enzyme complex); GO:5737(cytoplasm); GO:5634(nucleus)	GO:3725(double-stranded RNA binding); GO:3676(nucleic acid binding); GO:166(nucleotide binding); GO:5515(protein binding); GO:3727(single-stranded RNA binding)	Mammalian apolipoprotein B mRNA undergoes site-specific C to U deamination, which is mediated by a multi-component enzyme complex containing a minimal core composed of APOBEC-1 and a complementation factor encoded by this gene. The gene product has three non-identical RNA recognition motifs and belongs to the hnRNP R family of RNA-binding proteins. It has been proposed that this complementation f…	GO:6381(mRNA editing); GO:6397(mRNA processing); GO:50821(protein stabilization)			apobec-1 complementation factor isoform 42			16055734; 15164054; 15148397; 14702039; 12896982; 12881431; 12477932; 11871661; 11815617; 11752456; 11718896; 11577082; 11571303; 11352648; 11329013; 11134005; 11072063; 10833526; 10781591; 10669798
A_32_P110911	A2LD40	-0.407148	P	758163	893115	LOC87808	NM_033110	NM_033110	NM_033110	A2LD40	chr13:101183916-101183896	GO:0003839(gamma-glutamylcyclotransferase activity)|GO:0016746(transferase activity, transferring acyl groups)|GO:0042219(cellular modified amino acid catabolic process)	Hs.350868	ENST00000455100	Homo sapiens AIG2-like domain 1 (A2LD1), transcript variant 1, mRNA [NM_033110]	hs|13q32.42	THC2610229		AIG2-like domain 40	GCTGTATATCAGAGTGCGTATAGCACCATTCTTCCTAATTTTCAGATCAAGCTTCACAGC	284905		GO:0005554(molecular function unknown)					LOC87769 protein			14702039; 12477971
A_23_P116937	A2M	-0.41259	P	760909	896350	CPAMD5; FWP007; S863-7; alpha 2M; DKFZp779B125	NM_000014	NM_000014	NM_000014	A2M	chr12:009221418-009221398	GO:0001869(negative regulation of complement activation, lectin pathway)|GO:0002576(platelet degranulation)|GO:0004867(serine-type endopeptidase inhibitor activity)|GO:0005515(protein binding)|GO:0005576(extracellular region)|GO:0005615(extracellular space)|GO:0005829(cytosol)|GO:0007264(small GTPase mediated signal transduction)|GO:0007596(blood coagulation)|GO:0007597(blood coagulation, intrins…	Hs.212838	ENST00000540099	Homo sapiens alpha-2-macroglobulin (A2M), mRNA [NM_000014]	hs|12p13.31	NP1387584	GO:0001869(negative regulation of complement activation, lectin pathway)|GO:0004867(serine-type endopeptidase inhibitor activity)|GO:0005576(extracellular region)|GO:0005615(extracellular space)|GO:0006953(acute-phase response)|GO:0007584(response to nutrient)|GO:0010037(response to carbon dioxide)|GO:0019899(enzyme binding)|GO:0019959(interleukin-8 binding)|GO:0019966(interleukin-1 binding)|GO:0…	alpha-2-macroglobulin	CTTGTTCTTCACGGTTCTGCAAGATGTCCCAGTAAGAGATCTGAAACCAGCCATAGTGAA	285545	GO:5576(extracellular region)	GO:19899(enzyme binding); GO:19966(interleukin-1 binding); GO:19959(interleukin-8 binding); GO:8320(protein carrier activity); GO:4867(serine-type endopeptidase inhibitor activity); GO:43120(tumor necrosis factor binding); GO:17114(wide-spectrum protease inhibitor activity)	Alpha-2-macroglobulin is a protease inhibitor and cytokine transporter. It inhibits many proteases, including trypsin, thrombin and collagenase. A2M is implicated in Alzheimer disease (AD) due to its ability to mediate the clearance and degradation of A-beta, the major component of beta-amyloid deposits.	GO:6886(intracellular protein transport); GO:51260(protein homooligomerization)			alpha-2-macroglobulin precursor	Alzheimer disease, susceptibility to; Emphysema due to alpha-2-macroglobulin deficiency	KEGG pathway: Alzheimer's disease 05010; KEGG pathway: Complement and coagulation cascades 04610; Reactome Event:Hemostasis 109621	17071617; 16910174; 16784755; 16641085; 16407218; 16335952; 16297527; 16232083; 15931081; 15910735; 15908432; 15611997; 15511627; 15489334; 15023809; 14760718; 14718574; 14715656; 14678766; 14675603; 14637088; 14506912; 12966032; 12755687; 12755614; 12754519; 12631277; 12477932; 12221172; 12194978; 12175343; 12062545; 12042276; 12015318; 11916201; 11910179; 11901360; 11823454; 11811950; 11435418;…
A_33_P3525302	A2ML40	-0.418032	A	763654	899585		NM_144670	NM_144670	NM_144670	A2ML40	chr12:009027061-009027159	GO:0004867(serine-type endopeptidase inhibitor activity)|GO:0005576(extracellular region)|GO:0005615(extracellular space)|GO:0010466(negative regulation of peptidase activity)|GO:0030414(peptidase inhibitor activity)|GO:0052548(regulation of endopeptidase activity)	Hs.620532	ENST00000541459	Homo sapiens alpha-2-macroglobulin-like 1 (A2ML1), mRNA [NM_144670]	hs|12p13.31	NP1390503	GO:0004867(serine-type endopeptidase inhibitor activity)|GO:0005515(protein binding)|GO:0005576(extracellular region)|GO:0005615(extracellular space)|GO:0052548(regulation of endopeptidase activity)	alpha-2-macroglobulin-like 40	AAAGTGTGCTGGTCACCAACTTGAAACCAGCAACCATCAAGGTCTATGACTACTACCTAC	286186
A_24_P151161	A1BG	-0.423474	A	766400	902819	A1B; ABG; GAB; HYST2477; DKFZp686F1010				A1BG	chr19:058857206-058857187	GO:0003674(molecular_function)|GO:0005576(extracellular region)|GO:0008150(biological_process)	Hs.529161		Homo sapiens cDNA FLJ31639 fis, clone NT2RI2003655, weakly similar to ZINC FINGER PROTEIN 195. [AK056201]	hs|19q13.43	THC2461029		alpha-1-B glycoprotein	GCTAGTGATCTGGTTTACTGCCTTAGTAATATCTAGTTCCTAATATGCCTATGCCTTTTA	286826	GO:5576(extracellular region)	GO:3674(molecular_function)	The protein encoded by this gene is a plasma glycoprotein of unknown function. The protein shows sequence similarity to the variable regions of some immunoglobulin supergene family member proteins.	GO:8150(biological_process)			alpha 1B-glycoprotein			16335952; 15489334; 15461460; 15221005; 14760718; 14702039; 12477932; 8889549; 3610142; 3458201; 2591107
A_33_P3685256	A1BG	-0.428916	P	769146	906054		NM_130786	NM_130786	NM_130786	A1BG	chr19:058858293-058858274	GO:0003674(molecular_function)|GO:0005576(extracellular region)|GO:0008150(biological_process)	Hs.529161	ENST00000263100	Homo sapiens alpha-1-B glycoprotein (A1BG), mRNA [NM_130786]	hs|19q13.43	THC2461029	GO:0003674(molecular_function)|GO:0005576(extracellular region)|GO:0008150(biological_process)	alpha-1-B glycoprotein	TCTCTGGGGGGCTGGAGAAGCCTCCCTCATTCCTCCCAGGAATTAATAAATGTGAAGAGA	287467
A_24_P721739	A1BG-AS41	-0.434358	A	771892	909289	FLJ23609	NR_015380	NR_015380	NR_015380	A1BG-AS41	chr19:058866199-058866298		Hs.709582		Homo sapiens A1BG antisense RNA 1 (non-protein coding) (A1BG-AS1), non-coding RNA [NR_015380]	hs|19q13.43	NP73551323		A1BG antisense RNA 1 (non-protein coding)	AGGGTGTGCACAGAACTCAGAAGTCAGACCACTGAACAGTGACAGAACCTTTCAGCCCAT	288107					FLI_CDNA; oligo capping; fis (full insert sequence)					12477972
A_23_P104264	A1CF	-0.439799	P	774638	912523	ACF; ASP; ACF64; ACF65; MGC163391; RP11-564C4.42	NM_138933	NM_138933	NM_138933	A1CF	chr10:052570857-052570840	GO:0000166(nucleotide binding)|GO:0003676(nucleic acid binding)|GO:0003723(RNA binding)|GO:0003725(double-stranded RNA binding)|GO:0003727(single-stranded RNA binding)|GO:0003729(mRNA binding)|GO:0004131(cytosine deaminase activity)|GO:0005515(protein binding)|GO:0005622(intracellular)|GO:0005634(nucleus)|GO:0005654(nucleoplasm)|GO:0005720(nuclear heterochromatin)|GO:0005737(cytoplasm)|GO:0005783…	Hs.282795	ENST00000395489	Homo sapiens APOBEC1 complementation factor (A1CF), transcript variant 3, mRNA [NM_138933]	hs|10q11.63	NP74485148	GO:0000166(nucleotide binding)|GO:0003725(double-stranded RNA binding)|GO:0003727(single-stranded RNA binding)|GO:0005515(protein binding)|GO:0005634(nucleus)|GO:0005737(cytoplasm)|GO:0005783(endoplasmic reticulum)|GO:0006397(mRNA processing)|GO:0030895(apolipoprotein B mRNA editing enzyme complex)|GO:0050821(protein stabilization)	APOBEC1 complementation factor	GACAGCTATTCTTGTACAAAATAACTATTCCTGCTCTAGCCAGCCAGAATCCTGCAATCC	288748	GO:30895(apolipoprotein B mRNA editing enzyme complex); GO:5737(cytoplasm); GO:5634(nucleus)	GO:3725(double-stranded RNA binding); GO:3676(nucleic acid binding); GO:166(nucleotide binding); GO:5515(protein binding); GO:3727(single-stranded RNA binding)	Mammalian apolipoprotein B mRNA undergoes site-specific C to U deamination, which is mediated by a multi-component enzyme complex containing a minimal core composed of APOBEC-1 and a complementation factor encoded by this gene. The gene product has three non-identical RNA recognition motifs and belongs to the hnRNP R family of RNA-binding proteins. It has been proposed that this complementation f…	GO:6381(mRNA editing); GO:6397(mRNA processing); GO:50821(protein stabilization)			apobec-1 complementation factor isoform 43			16055734; 15164054; 15148397; 14702039; 12896982; 12881431; 12477932; 11871661; 11815617; 11752456; 11718896; 11577082; 11571303; 11352648; 11329013; 11134005; 11072063; 10833526; 10781591; 10669799
A_32_P110912	A2LD41	-0.445241	P	777384	915758	LOC87809	NM_033110	NM_033110	NM_033110	A2LD41	chr13:101183916-101183897	GO:0003839(gamma-glutamylcyclotransferase activity)|GO:0016746(transferase activity, transferring acyl groups)|GO:0042219(cellular modified amino acid catabolic process)	Hs.350868	ENST00000455100	Homo sapiens AIG2-like domain 1 (A2LD1), transcript variant 1, mRNA [NM_033110]	hs|13q32.43	THC2610230		AIG2-like domain 41	GCTGTATATCAGAGTGCGTATAGCACCATTCTTCCTAATTTTCAGATCAAGCTTCACAGC	289388		GO:0005554(molecular function unknown)					LOC87769 protein			14702039; 12477972
A_23_P116938	A2M	-0.450683	P	780130	918992	CPAMD5; FWP007; S863-7; alpha 2M; DKFZp779B126	NM_000014	NM_000014	NM_000014	A2M	chr12:009221418-009221399	GO:0001869(negative regulation of complement activation, lectin pathway)|GO:0002576(platelet degranulation)|GO:0004867(serine-type endopeptidase inhibitor activity)|GO:0005515(protein binding)|GO:0005576(extracellular region)|GO:0005615(extracellular space)|GO:0005829(cytosol)|GO:0007264(small GTPase mediated signal transduction)|GO:0007596(blood coagulation)|GO:0007597(blood coagulation, intrins…	Hs.212838	ENST00000540099	Homo sapiens alpha-2-macroglobulin (A2M), mRNA [NM_000014]	hs|12p13.31	NP1393422	GO:0001869(negative regulation of complement activation, lectin pathway)|GO:0004867(serine-type endopeptidase inhibitor activity)|GO:0005576(extracellular region)|GO:0005615(extracellular space)|GO:0006953(acute-phase response)|GO:0007584(response to nutrient)|GO:0010037(response to carbon dioxide)|GO:0019899(enzyme binding)|GO:0019959(interleukin-8 binding)|GO:0019966(interleukin-1 binding)|GO:0…	alpha-2-macroglobulin	CTTGTTCTTCACGGTTCTGCAAGATGTCCCAGTAAGAGATCTGAAACCAGCCATAGTGAA	290029	GO:5576(extracellular region)	GO:19899(enzyme binding); GO:19966(interleukin-1 binding); GO:19959(interleukin-8 binding); GO:8320(protein carrier activity); GO:4867(serine-type endopeptidase inhibitor activity); GO:43120(tumor necrosis factor binding); GO:17114(wide-spectrum protease inhibitor activity)	Alpha-2-macroglobulin is a protease inhibitor and cytokine transporter. It inhibits many proteases, including trypsin, thrombin and collagenase. A2M is implicated in Alzheimer disease (AD) due to its ability to mediate the clearance and degradation of A-beta, the major component of beta-amyloid deposits.	GO:6886(intracellular protein transport); GO:51260(protein homooligomerization)			alpha-2-macroglobulin precursor	Alzheimer disease, susceptibility to; Emphysema due to alpha-2-macroglobulin deficiency	KEGG pathway: Alzheimer's disease 05010; KEGG pathway: Complement and coagulation cascades 04610; Reactome Event:Hemostasis 109622	17071617; 16910174; 16784755; 16641085; 16407218; 16335952; 16297527; 16232083; 15931081; 15910735; 15908432; 15611997; 15511627; 15489334; 15023809; 14760718; 14718574; 14715656; 14678766; 14675603; 14637088; 14506912; 12966032; 12755687; 12755614; 12754519; 12631277; 12477932; 12221172; 12194978; 12175343; 12062545; 12042276; 12015318; 11916201; 11910179; 11901360; 11823454; 11811950; 11435418;…
A_33_P3525303	A2ML41	-0.456125	A	782876	922227		NM_144670	NM_144670	NM_144670	A2ML41	chr12:009027061-009027160	GO:0004867(serine-type endopeptidase inhibitor activity)|GO:0005576(extracellular region)|GO:0005615(extracellular space)|GO:0010466(negative regulation of peptidase activity)|GO:0030414(peptidase inhibitor activity)|GO:0052548(regulation of endopeptidase activity)	Hs.620532	ENST00000541459	Homo sapiens alpha-2-macroglobulin-like 1 (A2ML1), mRNA [NM_144670]	hs|12p13.31	NP1396341	GO:0004867(serine-type endopeptidase inhibitor activity)|GO:0005515(protein binding)|GO:0005576(extracellular region)|GO:0005615(extracellular space)|GO:0052548(regulation of endopeptidase activity)	alpha-2-macroglobulin-like 41	AAAGTGTGCTGGTCACCAACTTGAAACCAGCAACCATCAAGGTCTATGACTACTACCTAC	290669
A_24_P151162	A1BG	-0.461567	A	785622	925462	A1B; ABG; GAB; HYST2477; DKFZp686F1011				A1BG	chr19:058857206-058857188	GO:0003674(molecular_function)|GO:0005576(extracellular region)|GO:0008150(biological_process)	Hs.529161		Homo sapiens cDNA FLJ31639 fis, clone NT2RI2003655, weakly similar to ZINC FINGER PROTEIN 195. [AK056201]	hs|19q13.43	THC2461029		alpha-1-B glycoprotein	GCTAGTGATCTGGTTTACTGCCTTAGTAATATCTAGTTCCTAATATGCCTATGCCTTTTA	291310	GO:5576(extracellular region)	GO:3674(molecular_function)	The protein encoded by this gene is a plasma glycoprotein of unknown function. The protein shows sequence similarity to the variable regions of some immunoglobulin supergene family member proteins.	GO:8150(biological_process)			alpha 1B-glycoprotein			16335952; 15489334; 15461460; 15221005; 14760718; 14702039; 12477932; 8889549; 3610142; 3458201; 2591108
A_33_P3685257	A1BG	-0.467009	P	788368	928696		NM_130786	NM_130786	NM_130786	A1BG	chr19:058858293-058858275	GO:0003674(molecular_function)|GO:0005576(extracellular region)|GO:0008150(biological_process)	Hs.529161	ENST00000263100	Homo sapiens alpha-1-B glycoprotein (A1BG), mRNA [NM_130786]	hs|19q13.43	THC2461029	GO:0003674(molecular_function)|GO:0005576(extracellular region)|GO:0008150(biological_process)	alpha-1-B glycoprotein	TCTCTGGGGGGCTGGAGAAGCCTCCCTCATTCCTCCCAGGAATTAATAAATGTGAAGAGA	291950
A_24_P721740	A1BG-AS42	-0.472451	A	791114	931931	FLJ23610	NR_015380	NR_015380	NR_015380	A1BG-AS42	chr19:058866199-058866299		Hs.709582		Homo sapiens A1BG antisense RNA 1 (non-protein coding) (A1BG-AS1), non-coding RNA [NR_015380]	hs|19q13.43	NP75418973		A1BG antisense RNA 1 (non-protein coding)	AGGGTGTGCACAGAACTCAGAAGTCAGACCACTGAACAGTGACAGAACCTTTCAGCCCAT	292591					FLI_CDNA; oligo capping; fis (full insert sequence)					12477973
A_23_P104265	A1CF	-0.477893	P	793860	935166	ACF; ASP; ACF64; ACF65; MGC163391; RP11-564C4.43	NM_138933	NM_138933	NM_138933	A1CF	chr10:052570857-052570841	GO:0000166(nucleotide binding)|GO:0003676(nucleic acid binding)|GO:0003723(RNA binding)|GO:0003725(double-stranded RNA binding)|GO:0003727(single-stranded RNA binding)|GO:0003729(mRNA binding)|GO:0004131(cytosine deaminase activity)|GO:0005515(protein binding)|GO:0005622(intracellular)|GO:0005634(nucleus)|GO:0005654(nucleoplasm)|GO:0005720(nuclear heterochromatin)|GO:0005737(cytoplasm)|GO:0005783…	Hs.282795	ENST00000395489	Homo sapiens APOBEC1 complementation factor (A1CF), transcript variant 3, mRNA [NM_138933]	hs|10q11.64	NP76352798	GO:0000166(nucleotide binding)|GO:0003725(double-stranded RNA binding)|GO:0003727(single-stranded RNA binding)|GO:0005515(protein binding)|GO:0005634(nucleus)|GO:0005737(cytoplasm)|GO:0005783(endoplasmic reticulum)|GO:0006397(mRNA processing)|GO:0030895(apolipoprotein B mRNA editing enzyme complex)|GO:0050821(protein stabilization)	APOBEC1 complementation factor	GACAGCTATTCTTGTACAAAATAACTATTCCTGCTCTAGCCAGCCAGAATCCTGCAATCC	293231	GO:30895(apolipoprotein B mRNA editing enzyme complex); GO:5737(cytoplasm); GO:5634(nucleus)	GO:3725(double-stranded RNA binding); GO:3676(nucleic acid binding); GO:166(nucleotide binding); GO:5515(protein binding); GO:3727(single-stranded RNA binding)	Mammalian apolipoprotein B mRNA undergoes site-specific C to U deamination, which is mediated by a multi-component enzyme complex containing a minimal core composed of APOBEC-1 and a complementation factor encoded by this gene. The gene product has three non-identical RNA recognition motifs and belongs to the hnRNP R family of RNA-binding proteins. It has been proposed that this complementation f…	GO:6381(mRNA editing); GO:6397(mRNA processing); GO:50821(protein stabilization)			apobec-1 complementation factor isoform 44			16055734; 15164054; 15148397; 14702039; 12896982; 12881431; 12477932; 11871661; 11815617; 11752456; 11718896; 11577082; 11571303; 11352648; 11329013; 11134005; 11072063; 10833526; 10781591; 10669800
A_32_P110913	A2LD42	-0.483334	P	796606	938400	LOC87810	NM_033110	NM_033110	NM_033110	A2LD42	chr13:101183916-101183898	GO:0003839(gamma-glutamylcyclotransferase activity)|GO:0016746(transferase activity, transferring acyl groups)|GO:0042219(cellular modified amino acid catabolic process)	Hs.350868	ENST00000455100	Homo sapiens AIG2-like domain 1 (A2LD1), transcript variant 1, mRNA [NM_033110]	hs|13q32.44	THC2610231		AIG2-like domain 42	GCTGTATATCAGAGTGCGTATAGCACCATTCTTCCTAATTTTCAGATCAAGCTTCACAGC	293872		GO:0005554(molecular function unknown)					LOC87769 protein			14702039; 12477973
A_23_P116939	A2M	-0.488776	P	799352	941635	CPAMD5; FWP007; S863-7; alpha 2M; DKFZp779B127	NM_000014	NM_000014	NM_000014	A2M	chr12:009221418-009221400	GO:0001869(negative regulation of complement activation, lectin pathway)|GO:0002576(platelet degranulation)|GO:0004867(serine-type endopeptidase inhibitor activity)|GO:0005515(protein binding)|GO:0005576(extracellular region)|GO:0005615(extracellular space)|GO:0005829(cytosol)|GO:0007264(small GTPase mediated signal transduction)|GO:0007596(blood coagulation)|GO:0007597(blood coagulation, intrins…	Hs.212838	ENST00000540099	Homo sapiens alpha-2-macroglobulin (A2M), mRNA [NM_000014]	hs|12p13.31	NP1399260	GO:0001869(negative regulation of complement activation, lectin pathway)|GO:0004867(serine-type endopeptidase inhibitor activity)|GO:0005576(extracellular region)|GO:0005615(extracellular space)|GO:0006953(acute-phase response)|GO:0007584(response to nutrient)|GO:0010037(response to carbon dioxide)|GO:0019899(enzyme binding)|GO:0019959(interleukin-8 binding)|GO:0019966(interleukin-1 binding)|GO:0…	alpha-2-macroglobulin	CTTGTTCTTCACGGTTCTGCAAGATGTCCCAGTAAGAGATCTGAAACCAGCCATAGTGAA	294512	GO:5576(extracellular region)	GO:19899(enzyme binding); GO:19966(interleukin-1 binding); GO:19959(interleukin-8 binding); GO:8320(protein carrier activity); GO:4867(serine-type endopeptidase inhibitor activity); GO:43120(tumor necrosis factor binding); GO:17114(wide-spectrum protease inhibitor activity)	Alpha-2-macroglobulin is a protease inhibitor and cytokine transporter. It inhibits many proteases, including trypsin, thrombin and collagenase. A2M is implicated in Alzheimer disease (AD) due to its ability to mediate the clearance and degradation of A-beta, the major component of beta-amyloid deposits.	GO:6886(intracellular protein transport); GO:51260(protein homooligomerization)			alpha-2-macroglobulin precursor	Alzheimer disease, susceptibility to; Emphysema due to alpha-2-macroglobulin deficiency	KEGG pathway: Alzheimer's disease 05010; KEGG pathway: Complement and coagulation cascades 04610; Reactome Event:Hemostasis 109623	17071617; 16910174; 16784755; 16641085; 16407218; 16335952; 16297527; 16232083; 15931081; 15910735; 15908432; 15611997; 15511627; 15489334; 15023809; 14760718; 14718574; 14715656; 14678766; 14675603; 14637088; 14506912; 12966032; 12755687; 12755614; 12754519; 12631277; 12477932; 12221172; 12194978; 12175343; 12062545; 12042276; 12015318; 11916201; 11910179; 11901360; 11823454; 11811950; 11435418;…
A_33_P3525304	A2ML42	-0.494218	A	802098	944870		NM_144670	NM_144670	NM_144670	A2ML42	chr12:009027061-009027161	GO:0004867(serine-type endopeptidase inhibitor activity)|GO:0005576(extracellular region)|GO:0005615(extracellular space)|GO:0010466(negative regulation of peptidase activity)|GO:0030414(peptidase inhibitor activity)|GO:0052548(regulation of endopeptidase activity)	Hs.620532	ENST00000541459	Homo sapiens alpha-2-macroglobulin-like 1 (A2ML1), mRNA [NM_144670]	hs|12p13.31	NP1402179	GO:0004867(serine-type endopeptidase inhibitor activity)|GO:0005515(protein binding)|GO:0005576(extracellular region)|GO:0005615(extracellular space)|GO:0052548(regulation of endopeptidase activity)	alpha-2-macroglobulin-like 42	AAAGTGTGCTGGTCACCAACTTGAAACCAGCAACCATCAAGGTCTATGACTACTACCTAC	295153
A_24_P151163	A1BG	-0.49966	A	804844	948104	A1B; ABG; GAB; HYST2477; DKFZp686F1012				A1BG	chr19:058857206-058857189	GO:0003674(molecular_function)|GO:0005576(extracellular region)|GO:0008150(biological_process)	Hs.529161		Homo sapiens cDNA FLJ31639 fis, clone NT2RI2003655, weakly similar to ZINC FINGER PROTEIN 195. [AK056201]	hs|19q13.43	THC2461029		alpha-1-B glycoprotein	GCTAGTGATCTGGTTTACTGCCTTAGTAATATCTAGTTCCTAATATGCCTATGCCTTTTA	295793	GO:5576(extracellular region)	GO:3674(molecular_function)	The protein encoded by this gene is a plasma glycoprotein of unknown function. The protein shows sequence similarity to the variable regions of some immunoglobulin supergene family member proteins.	GO:8150(biological_process)			alpha 1B-glycoprotein			16335952; 15489334; 15461460; 15221005; 14760718; 14702039; 12477932; 8889549; 3610142; 3458201; 2591109
A_33_P3685258	A1BG	-0.505102	P	807589	951339		NM_130786	NM_130786	NM_130786	A1BG	chr19:058858293-058858276	GO:0003674(molecular_function)|GO:0005576(extracellular region)|GO:0008150(biological_process)	Hs.529161	ENST00000263100	Homo sapiens alpha-1-B glycoprotein (A1BG), mRNA [NM_130786]	hs|19q13.43	THC2461029	GO:0003674(molecular_function)|GO:0005576(extracellular region)|GO:0008150(biological_process)	alpha-1-B glycoprotein	TCTCTGGGGGGCTGGAGAAGCCTCCCTCATTCCTCCCAGGAATTAATAAATGTGAAGAGA	296434
A_24_P721741	A1BG-AS43	-0.510544	A	810335	954574	FLJ23611	NR_015380	NR_015380	NR_015380	A1BG-AS43	chr19:058866199-058866300		Hs.709582		Homo sapiens A1BG antisense RNA 1 (non-protein coding) (A1BG-AS1), non-coding RNA [NR_015380]	hs|19q13.43	NP77286623		A1BG antisense RNA 1 (non-protein coding)	AGGGTGTGCACAGAACTCAGAAGTCAGACCACTGAACAGTGACAGAACCTTTCAGCCCAT	297074					FLI_CDNA; oligo capping; fis (full insert sequence)					12477974
A_23_P104266	A1CF	-0.515986	P	813081	957808	ACF; ASP; ACF64; ACF65; MGC163391; RP11-564C4.44	NM_138933	NM_138933	NM_138933	A1CF	chr10:052570857-052570842	GO:0000166(nucleotide binding)|GO:0003676(nucleic acid binding)|GO:0003723(RNA binding)|GO:0003725(double-stranded RNA binding)|GO:0003727(single-stranded RNA binding)|GO:0003729(mRNA binding)|GO:0004131(cytosine deaminase activity)|GO:0005515(protein binding)|GO:0005622(intracellular)|GO:0005634(nucleus)|GO:0005654(nucleoplasm)|GO:0005720(nuclear heterochromatin)|GO:0005737(cytoplasm)|GO:0005783…	Hs.282795	ENST00000395489	Homo sapiens APOBEC1 complementation factor (A1CF), transcript variant 3, mRNA [NM_138933]	hs|10q11.65	NP78220448	GO:0000166(nucleotide binding)|GO:0003725(double-stranded RNA binding)|GO:0003727(single-stranded RNA binding)|GO:0005515(protein binding)|GO:0005634(nucleus)|GO:0005737(cytoplasm)|GO:0005783(endoplasmic reticulum)|GO:0006397(mRNA processing)|GO:0030895(apolipoprotein B mRNA editing enzyme complex)|GO:0050821(protein stabilization)	APOBEC1 complementation factor	GACAGCTATTCTTGTACAAAATAACTATTCCTGCTCTAGCCAGCCAGAATCCTGCAATCC	297715	GO:30895(apolipoprotein B mRNA editing enzyme complex); GO:5737(cytoplasm); GO:5634(nucleus)	GO:3725(double-stranded RNA binding); GO:3676(nucleic acid binding); GO:166(nucleotide binding); GO:5515(protein binding); GO:3727(single-stranded RNA binding)	Mammalian apolipoprotein B mRNA undergoes site-specific C to U deamination, which is mediated by a multi-component enzyme complex containing a minimal core composed of APOBEC-1 and a complementation factor encoded by this gene. The gene product has three non-identical RNA recognition motifs and belongs to the hnRNP R family of RNA-binding proteins. It has been proposed that this complementation f…	GO:6381(mRNA editing); GO:6397(mRNA processing); GO:50821(protein stabilization)			apobec-1 complementation factor isoform 45			16055734; 15164054; 15148397; 14702039; 12896982; 12881431; 12477932; 11871661; 11815617; 11752456; 11718896; 11577082; 11571303; 11352648; 11329013; 11134005; 11072063; 10833526; 10781591; 10669801
A_32_P110914	A2LD43	-0.521428	P	815827	961043	LOC87811	NM_033110	NM_033110	NM_033110	A2LD43	chr13:101183916-101183899	GO:0003839(gamma-glutamylcyclotransferase activity)|GO:0016746(transferase activity, transferring acyl groups)|GO:0042219(cellular modified amino acid catabolic process)	Hs.350868	ENST00000455100	Homo sapiens AIG2-like domain 1 (A2LD1), transcript variant 1, mRNA [NM_033110]	hs|13q32.45	THC2610232		AIG2-like domain 43	GCTGTATATCAGAGTGCGTATAGCACCATTCTTCCTAATTTTCAGATCAAGCTTCACAGC	298355		GO:0005554(molecular function unknown)					LOC87769 protein			14702039; 12477974
A_23_P116940	A2M	-0.526869	P	818573	964278	CPAMD5; FWP007; S863-7; alpha 2M; DKFZp779B128	NM_000014	NM_000014	NM_000014	A2M	chr12:009221418-009221401	GO:0001869(negative regulation of complement activation, lectin pathway)|GO:0002576(platelet degranulation)|GO:0004867(serine-type endopeptidase inhibitor activity)|GO:0005515(protein binding)|GO:0005576(extracellular region)|GO:0005615(extracellular space)|GO:0005829(cytosol)|GO:0007264(small GTPase mediated signal transduction)|GO:0007596(blood coagulation)|GO:0007597(blood coagulation, intrins…	Hs.212838	ENST00000540099	Homo sapiens alpha-2-macroglobulin (A2M), mRNA [NM_000014]	hs|12p13.31	NP1405098	GO:0001869(negative regulation of complement activation, lectin pathway)|GO:0004867(serine-type endopeptidase inhibitor activity)|GO:0005576(extracellular region)|GO:0005615(extracellular space)|GO:0006953(acute-phase response)|GO:0007584(response to nutrient)|GO:0010037(response to carbon dioxide)|GO:0019899(enzyme binding)|GO:0019959(interleukin-8 binding)|GO:0019966(interleukin-1 binding)|GO:0…	alpha-2-macroglobulin	CTTGTTCTTCACGGTTCTGCAAGATGTCCCAGTAAGAGATCTGAAACCAGCCATAGTGAA	298996	GO:5576(extracellular region)	GO:19899(enzyme binding); GO:19966(interleukin-1 binding); GO:19959(interleukin-8 binding); GO:8320(protein carrier activity); GO:4867(serine-type endopeptidase inhibitor activity); GO:43120(tumor necrosis factor binding); GO:17114(wide-spectrum protease inhibitor activity)	Alpha-2-macroglobulin is a protease inhibitor and cytokine transporter. It inhibits many proteases, including trypsin, thrombin and collagenase. A2M is implicated in Alzheimer disease (AD) due to its ability to mediate the clearance and degradation of A-beta, the major component of beta-amyloid deposits.	GO:6886(intracellular protein transport); GO:51260(protein homooligomerization)			alpha-2-macroglobulin precursor	Alzheimer disease, susceptibility to; Emphysema due to alpha-2-macroglobulin deficiency	KEGG pathway: Alzheimer's disease 05010; KEGG pathway: Complement and coagulation cascades 04610; Reactome Event:Hemostasis 109624	17071617; 16910174; 16784755; 16641085; 16407218; 16335952; 16297527; 16232083; 15931081; 15910735; 15908432; 15611997; 15511627; 15489334; 15023809; 14760718; 14718574; 14715656; 14678766; 14675603; 14637088; 14506912; 12966032; 12755687; 12755614; 12754519; 12631277; 12477932; 12221172; 12194978; 12175343; 12062545; 12042276; 12015318; 11916201; 11910179; 11901360; 11823454; 11811950; 11435418;…
A_33_P3525305	A2ML43	-0.532311	A	821319	967512		NM_144670	NM_144670	NM_144670	A2ML43	chr12:009027061-009027162	GO:0004867(serine-type endopeptidase inhibitor activity)|GO:0005576(extracellular region)|GO:0005615(extracellular space)|GO:0010466(negative regulation of peptidase activity)|GO:0030414(peptidase inhibitor activity)|GO:0052548(regulation of endopeptidase activity)	Hs.620532	ENST00000541459	Homo sapiens alpha-2-macroglobulin-like 1 (A2ML1), mRNA [NM_144670]	hs|12p13.31	NP1408017	GO:0004867(serine-type endopeptidase inhibitor activity)|GO:0005515(protein binding)|GO:0005576(extracellular region)|GO:0005615(extracellular space)|GO:0052548(regulation of endopeptidase activity)	alpha-2-macroglobulin-like 43	AAAGTGTGCTGGTCACCAACTTGAAACCAGCAACCATCAAGGTCTATGACTACTACCTAC	299636
A_24_P151164	A1BG	-0.537753	A	824065	970747	A1B; ABG; GAB; HYST2477; DKFZp686F1013				A1BG	chr19:058857206-058857190	GO:0003674(molecular_function)|GO:0005576(extracellular region)|GO:0008150(biological_process)	Hs.529161		Homo sapiens cDNA FLJ31639 fis, clone NT2RI2003655, weakly similar to ZINC FINGER PROTEIN 195. [AK056201]	hs|19q13.43	THC2461029		alpha-1-B glycoprotein	GCTAGTGATCTGGTTTACTGCCTTAGTAATATCTAGTTCCTAATATGCCTATGCCTTTTA	300277	GO:5576(extracellular region)	GO:3674(molecular_function)	The protein encoded by this gene is a plasma glycoprotein of unknown function. The protein shows sequence similarity to the variable regions of some immunoglobulin supergene family member proteins.	GO:8150(biological_process)			alpha 1B-glycoprotein			16335952; 15489334; 15461460; 15221005; 14760718; 14702039; 12477932; 8889549; 3610142; 3458201; 2591110
A_33_P3685259	A1BG	-0.543195	P	826811	973982		NM_130786	NM_130786	NM_130786	A1BG	chr19:058858293-058858277	GO:0003674(molecular_function)|GO:0005576(extracellular region)|GO:0008150(biological_process)	Hs.529161	ENST00000263100	Homo sapiens alpha-1-B glycoprotein (A1BG), mRNA [NM_130786]	hs|19q13.43	THC2461029	GO:0003674(molecular_function)|GO:0005576(extracellular region)|GO:0008150(biological_process)	alpha-1-B glycoprotein	TCTCTGGGGGGCTGGAGAAGCCTCCCTCATTCCTCCCAGGAATTAATAAATGTGAAGAGA	300917
A_24_P721742	A1BG-AS44	-0.548637	A	829557	977216	FLJ23612	NR_015380	NR_015380	NR_015380	A1BG-AS44	chr19:058866199-058866301		Hs.709582		Homo sapiens A1BG antisense RNA 1 (non-protein coding) (A1BG-AS1), non-coding RNA [NR_015380]	hs|19q13.43	NP79154273		A1BG antisense RNA 1 (non-protein coding)	AGGGTGTGCACAGAACTCAGAAGTCAGACCACTGAACAGTGACAGAACCTTTCAGCCCAT	301558					FLI_CDNA; oligo capping; fis (full insert sequence)					12477975
A_23_P104267	A1CF	-0.554079	P	832303	980451	ACF; ASP; ACF64; ACF65; MGC163391; RP11-564C4.45	NM_138933	NM_138933	NM_138933	A1CF	chr10:052570857-052570843	GO:0000166(nucleotide binding)|GO:0003676(nucleic acid binding)|GO:0003723(RNA binding)|GO:0003725(double-stranded RNA binding)|GO:0003727(single-stranded RNA binding)|GO:0003729(mRNA binding)|GO:0004131(cytosine deaminase activity)|GO:0005515(protein binding)|GO:0005622(intracellular)|GO:0005634(nucleus)|GO:0005654(nucleoplasm)|GO:0005720(nuclear heterochromatin)|GO:0005737(cytoplasm)|GO:0005783…	Hs.282795	ENST00000395489	Homo sapiens APOBEC1 complementation factor (A1CF), transcript variant 3, mRNA [NM_138933]	hs|10q11.66	NP80088098	GO:0000166(nucleotide binding)|GO:0003725(double-stranded RNA binding)|GO:0003727(single-stranded RNA binding)|GO:0005515(protein binding)|GO:0005634(nucleus)|GO:0005737(cytoplasm)|GO:0005783(endoplasmic reticulum)|GO:0006397(mRNA processing)|GO:0030895(apolipoprotein B mRNA editing enzyme complex)|GO:0050821(protein stabilization)	APOBEC1 complementation factor	GACAGCTATTCTTGTACAAAATAACTATTCCTGCTCTAGCCAGCCAGAATCCTGCAATCC	302198	GO:30895(apolipoprotein B mRNA editing enzyme complex); GO:5737(cytoplasm); GO:5634(nucleus)	GO:3725(double-stranded RNA binding); GO:3676(nucleic acid binding); GO:166(nucleotide binding); GO:5515(protein binding); GO:3727(single-stranded RNA binding)	Mammalian apolipoprotein B mRNA undergoes site-specific C to U deamination, which is mediated by a multi-component enzyme complex containing a minimal core composed of APOBEC-1 and a complementation factor encoded by this gene. The gene product has three non-identical RNA recognition motifs and belongs to the hnRNP R family of RNA-binding proteins. It has been proposed that this complementation f…	GO:6381(mRNA editing); GO:6397(mRNA processing); GO:50821(protein stabilization)			apobec-1 complementation factor isoform 46			16055734; 15164054; 15148397; 14702039; 12896982; 12881431; 12477932; 11871661; 11815617; 11752456; 11718896; 11577082; 11571303; 11352648; 11329013; 11134005; 11072063; 10833526; 10781591; 10669802
A_32_P110915	A2LD44	-0.559521	P	835049	983686	LOC87812	NM_033110	NM_033110	NM_033110	A2LD44	chr13:101183916-101183900	GO:0003839(gamma-glutamylcyclotransferase activity)|GO:0016746(transferase activity, transferring acyl groups)|GO:0042219(cellular modified amino acid catabolic process)	Hs.350868	ENST00000455100	Homo sapiens AIG2-like domain 1 (A2LD1), transcript variant 1, mRNA [NM_033110]	hs|13q32.46	THC2610233		AIG2-like domain 44	GCTGTATATCAGAGTGCGTATAGCACCATTCTTCCTAATTTTCAGATCAAGCTTCACAGC	302839		GO:0005554(molecular function unknown)					LOC87769 protein			14702039; 12477975
A_23_P116941	A2M	-0.564963	P	837795	986920	CPAMD5; FWP007; S863-7; alpha 2M; DKFZp779B129	NM_000014	NM_000014	NM_000014	A2M	chr12:009221418-009221402	GO:0001869(negative regulation of complement activation, lectin pathway)|GO:0002576(platelet degranulation)|GO:0004867(serine-type endopeptidase inhibitor activity)|GO:0005515(protein binding)|GO:0005576(extracellular region)|GO:0005615(extracellular space)|GO:0005829(cytosol)|GO:0007264(small GTPase mediated signal transduction)|GO:0007596(blood coagulation)|GO:0007597(blood coagulation, intrins…	Hs.212838	ENST00000540099	Homo sapiens alpha-2-macroglobulin (A2M), mRNA [NM_000014]	hs|12p13.31	NP1410936	GO:0001869(negative regulation of complement activation, lectin pathway)|GO:0004867(serine-type endopeptidase inhibitor activity)|GO:0005576(extracellular region)|GO:0005615(extracellular space)|GO:0006953(acute-phase response)|GO:0007584(response to nutrient)|GO:0010037(response to carbon dioxide)|GO:0019899(enzyme binding)|GO:0019959(interleukin-8 binding)|GO:0019966(interleukin-1 binding)|GO:0…	alpha-2-macroglobulin	CTTGTTCTTCACGGTTCTGCAAGATGTCCCAGTAAGAGATCTGAAACCAGCCATAGTGAA	303479	GO:5576(extracellular region)	GO:19899(enzyme binding); GO:19966(interleukin-1 binding); GO:19959(interleukin-8 binding); GO:8320(protein carrier activity); GO:4867(serine-type endopeptidase inhibitor activity); GO:43120(tumor necrosis factor binding); GO:17114(wide-spectrum protease inhibitor activity)	Alpha-2-macroglobulin is a protease inhibitor and cytokine transporter. It inhibits many proteases, including trypsin, thrombin and collagenase. A2M is implicated in Alzheimer disease (AD) due to its ability to mediate the clearance and degradation of A-beta, the major component of beta-amyloid deposits.	GO:6886(intracellular protein transport); GO:51260(protein homooligomerization)			alpha-2-macroglobulin precursor	Alzheimer disease, susceptibility to; Emphysema due to alpha-2-macroglobulin deficiency	KEGG pathway: Alzheimer's disease 05010; KEGG pathway: Complement and coagulation cascades 04610; Reactome Event:Hemostasis 109625	17071617; 16910174; 16784755; 16641085; 16407218; 16335952; 16297527; 16232083; 15931081; 15910735; 15908432; 15611997; 15511627; 15489334; 15023809; 14760718; 14718574; 14715656; 14678766; 14675603; 14637088; 14506912; 12966032; 12755687; 12755614; 12754519; 12631277; 12477932; 12221172; 12194978; 12175343; 12062545; 12042276; 12015318; 11916201; 11910179; 11901360; 11823454; 11811950; 11435418;…
A_33_P3525306	A2ML44	-0.570404	A	840541	990155		NM_144670	NM_144670	NM_144670	A2ML44	chr12:009027061-009027163	GO:0004867(serine-type endopeptidase inhibitor activity)|GO:0005576(extracellular region)|GO:0005615(extracellular space)|GO:0010466(negative regulation of peptidase activity)|GO:0030414(peptidase inhibitor activity)|GO:0052548(regulation of endopeptidase activity)	Hs.620532	ENST00000541459	Homo sapiens alpha-2-macroglobulin-like 1 (A2ML1), mRNA [NM_144670]	hs|12p13.31	NP1413855	GO:0004867(serine-type endopeptidase inhibitor activity)|GO:0005515(protein binding)|GO:0005576(extracellular region)|GO:0005615(extracellular space)|GO:0052548(regulation of endopeptidase activity)	alpha-2-macroglobulin-like 44	AAAGTGTGCTGGTCACCAACTTGAAACCAGCAACCATCAAGGTCTATGACTACTACCTAC	304120
A_24_P151165	A1BG	-0.575846	A	843287	993390	A1B; ABG; GAB; HYST2477; DKFZp686F1014				A1BG	chr19:058857206-058857191	GO:0003674(molecular_function)|GO:0005576(extracellular region)|GO:0008150(biological_process)	Hs.529161		Homo sapiens cDNA FLJ31639 fis, clone NT2RI2003655, weakly similar to ZINC FINGER PROTEIN 195. [AK056201]	hs|19q13.43	THC2461029		alpha-1-B glycoprotein	GCTAGTGATCTGGTTTACTGCCTTAGTAATATCTAGTTCCTAATATGCCTATGCCTTTTA	304760	GO:5576(extracellular region)	GO:3674(molecular_function)	The protein encoded by this gene is a plasma glycoprotein of unknown function. The protein shows sequence similarity to the variable regions of some immunoglobulin supergene family member proteins.	GO:8150(biological_process)			alpha 1B-glycoprotein			16335952; 15489334; 15461460; 15221005; 14760718; 14702039; 12477932; 8889549; 3610142; 3458201; 2591111
A_33_P3685260	A1BG	-0.581288	P	846033	996624		NM_130786	NM_130786	NM_130786	A1BG	chr19:058858293-058858278	GO:0003674(molecular_function)|GO:0005576(extracellular region)|GO:0008150(biological_process)	Hs.529161	ENST00000263100	Homo sapiens alpha-1-B glycoprotein (A1BG), mRNA [NM_130786]	hs|19q13.43	THC2461029	GO:0003674(molecular_function)|GO:0005576(extracellular region)|GO:0008150(biological_process)	alpha-1-B glycoprotein	TCTCTGGGGGGCTGGAGAAGCCTCCCTCATTCCTCCCAGGAATTAATAAATGTGAAGAGA	305401
A_24_P721743	A1BG-AS45	-0.58673	A	848779	999859	FLJ23613	NR_015380	NR_015380	NR_015380	A1BG-AS45	chr19:058866199-058866302		Hs.709582		Homo sapiens A1BG antisense RNA 1 (non-protein coding) (A1BG-AS1), non-coding RNA [NR_015380]	hs|19q13.43	NP81021923		A1BG antisense RNA 1 (non-protein coding)	AGGGTGTGCACAGAACTCAGAAGTCAGACCACTGAACAGTGACAGAACCTTTCAGCCCAT	306041					FLI_CDNA; oligo capping; fis (full insert sequence)					12477976
A_23_P104268	A1CF	-0.592172	P	851524	1.00309e+06	ACF; ASP; ACF64; ACF65; MGC163391; RP11-564C4.46	NM_138933	NM_138933	NM_138933	A1CF	chr10:052570857-052570844	GO:0000166(nucleotide binding)|GO:0003676(nucleic acid binding)|GO:0003723(RNA binding)|GO:0003725(double-stranded RNA binding)|GO:0003727(single-stranded RNA binding)|GO:0003729(mRNA binding)|GO:0004131(cytosine deaminase activity)|GO:0005515(protein binding)|GO:0005622(intracellular)|GO:0005634(nucleus)|GO:0005654(nucleoplasm)|GO:0005720(nuclear heterochromatin)|GO:0005737(cytoplasm)|GO:0005783…	Hs.282795	ENST00000395489	Homo sapiens APOBEC1 complementation factor (A1CF), transcript variant 3, mRNA [NM_138933]	hs|10q11.67	NP81955748	GO:0000166(nucleotide binding)|GO:0003725(double-stranded RNA binding)|GO:0003727(single-stranded RNA binding)|GO:0005515(protein binding)|GO:0005634(nucleus)|GO:0005737(cytoplasm)|GO:0005783(endoplasmic reticulum)|GO:0006397(mRNA processing)|GO:0030895(apolipoprotein B mRNA editing enzyme complex)|GO:0050821(protein stabilization)	APOBEC1 complementation factor	GACAGCTATTCTTGTACAAAATAACTATTCCTGCTCTAGCCAGCCAGAATCCTGCAATCC	306682	GO:30895(apolipoprotein B mRNA editing enzyme complex); GO:5737(cytoplasm); GO:5634(nucleus)	GO:3725(double-stranded RNA binding); GO:3676(nucleic acid binding); GO:166(nucleotide binding); GO:5515(protein binding); GO:3727(single-stranded RNA binding)	Mammalian apolipoprotein B mRNA undergoes site-specific C to U deamination, which is mediated by a multi-component enzyme complex containing a minimal core composed of APOBEC-1 and a complementation factor encoded by this gene. The gene product has three non-identical RNA recognition motifs and belongs to the hnRNP R family of RNA-binding proteins. It has been proposed that this complementation f…	GO:6381(mRNA editing); GO:6397(mRNA processing); GO:50821(protein stabilization)			apobec-1 complementation factor isoform 47			16055734; 15164054; 15148397; 14702039; 12896982; 12881431; 12477932; 11871661; 11815617; 11752456; 11718896; 11577082; 11571303; 11352648; 11329013; 11134005; 11072063; 10833526; 10781591; 10669803
A_32_P110916	A2LD45	-0.597614	P	854270	1.00633e+06	LOC87813	NM_033110	NM_033110	NM_033110	A2LD45	chr13:101183916-101183901	GO:0003839(gamma-glutamylcyclotransferase activity)|GO:0016746(transferase activity, transferring acyl groups)|GO:0042219(cellular modified amino acid catabolic process)	Hs.350868	ENST00000455100	Homo sapiens AIG2-like domain 1 (A2LD1), transcript variant 1, mRNA [NM_033110]	hs|13q32.47	THC2610234		AIG2-like domain 45	GCTGTATATCAGAGTGCGTATAGCACCATTCTTCCTAATTTTCAGATCAAGCTTCACAGC	307322		GO:0005554(molecular function unknown)					LOC87769 protein			14702039; 12477976
A_23_P116942	A2M	-0.603056	P	857016	1.00956e+06	CPAMD5; FWP007; S863-7; alpha 2M; DKFZp779B130	NM_000014	NM_000014	NM_000014	A2M	chr12:009221418-009221403	GO:0001869(negative regulation of complement activation, lectin pathway)|GO:0002576(platelet degranulation)|GO:0004867(serine-type endopeptidase inhibitor activity)|GO:0005515(protein binding)|GO:0005576(extracellular region)|GO:0005615(extracellular space)|GO:0005829(cytosol)|GO:0007264(small GTPase mediated signal transduction)|GO:0007596(blood coagulation)|GO:0007597(blood coagulation, intrins…	Hs.212838	ENST00000540099	Homo sapiens alpha-2-macroglobulin (A2M), mRNA [NM_000014]	hs|12p13.31	NP1416774	GO:0001869(negative regulation of complement activation, lectin pathway)|GO:0004867(serine-type endopeptidase inhibitor activity)|GO:0005576(extracellular region)|GO:0005615(extracellular space)|GO:0006953(acute-phase response)|GO:0007584(response to nutrient)|GO:0010037(response to carbon dioxide)|GO:0019899(enzyme binding)|GO:0019959(interleukin-8 binding)|GO:0019966(interleukin-1 binding)|GO:0…	alpha-2-macroglobulin	CTTGTTCTTCACGGTTCTGCAAGATGTCCCAGTAAGAGATCTGAAACCAGCCATAGTGAA	307963	GO:5576(extracellular region)	GO:19899(enzyme binding); GO:19966(interleukin-1 binding); GO:19959(interleukin-8 binding); GO:8320(protein carrier activity); GO:4867(serine-type endopeptidase inhibitor activity); GO:43120(tumor necrosis factor binding); GO:17114(wide-spectrum protease inhibitor activity)	Alpha-2-macroglobulin is a protease inhibitor and cytokine transporter. It inhibits many proteases, including trypsin, thrombin and collagenase. A2M is implicated in Alzheimer disease (AD) due to its ability to mediate the clearance and degradation of A-beta, the major component of beta-amyloid deposits.	GO:6886(intracellular protein transport); GO:51260(protein homooligomerization)			alpha-2-macroglobulin precursor	Alzheimer disease, susceptibility to; Emphysema due to alpha-2-macroglobulin deficiency	KEGG pathway: Alzheimer's disease 05010; KEGG pathway: Complement and coagulation cascades 04610; Reactome Event:Hemostasis 109626	17071617; 16910174; 16784755; 16641085; 16407218; 16335952; 16297527; 16232083; 15931081; 15910735; 15908432; 15611997; 15511627; 15489334; 15023809; 14760718; 14718574; 14715656; 14678766; 14675603; 14637088; 14506912; 12966032; 12755687; 12755614; 12754519; 12631277; 12477932; 12221172; 12194978; 12175343; 12062545; 12042276; 12015318; 11916201; 11910179; 11901360; 11823454; 11811950; 11435418;…
A_33_P3525307	A2ML45	-0.608498	A	859762	1.0128e+06		NM_144670	NM_144670	NM_144670	A2ML45	chr12:009027061-009027164	GO:0004867(serine-type endopeptidase inhibitor activity)|GO:0005576(extracellular region)|GO:0005615(extracellular space)|GO:0010466(negative regulation of peptidase activity)|GO:0030414(peptidase inhibitor activity)|GO:0052548(regulation of endopeptidase activity)	Hs.620532	ENST00000541459	Homo sapiens alpha-2-macroglobulin-like 1 (A2ML1), mRNA [NM_144670]	hs|12p13.31	NP1419693	GO:0004867(serine-type endopeptidase inhibitor activity)|GO:0005515(protein binding)|GO:0005576(extracellular region)|GO:0005615(extracellular space)|GO:0052548(regulation of endopeptidase activity)	alpha-2-macroglobulin-like 45	AAAGTGTGCTGGTCACCAACTTGAAACCAGCAACCATCAAGGTCTATGACTACTACCTAC	308603
A_24_P151166	A1BG	-0.613939	A	862508	1.01603e+06	A1B; ABG; GAB; HYST2477; DKFZp686F1015				A1BG	chr19:058857206-058857192	GO:0003674(molecular_function)|GO:0005576(extracellular region)|GO:0008150(biological_process)	Hs.529161		Homo sapiens cDNA FLJ31639 fis, clone NT2RI2003655, weakly similar to ZINC FINGER PROTEIN 195. [AK056201]	hs|19q13.43	THC2461029		alpha-1-B glycoprotein	GCTAGTGATCTGGTTTACTGCCTTAGTAATATCTAGTTCCTAATATGCCTATGCCTTTTA	309244	GO:5576(extracellular region)	GO:3674(molecular_function)	The protein encoded by this gene is a plasma glycoprotein of unknown function. The protein shows sequence similarity to the variable regions of some immunoglobulin supergene family member proteins.	GO:8150(biological_process)			alpha 1B-glycoprotein			16335952; 15489334; 15461460; 15221005; 14760718; 14702039; 12477932; 8889549; 3610142; 3458201; 2591112
A_33_P3685261	A1BG	-0.619381	P	865254	1.01927e+06		NM_130786	NM_130786	NM_130786	A1BG	chr19:058858293-058858279	GO:0003674(molecular_function)|GO:0005576(extracellular region)|GO:0008150(biological_process)	Hs.529161	ENST00000263100	Homo sapiens alpha-1-B glycoprotein (A1BG), mRNA [NM_130786]	hs|19q13.43	THC2461029	GO:0003674(molecular_function)|GO:0005576(extracellular region)|GO:0008150(biological_process)	alpha-1-B glycoprotein	TCTCTGGGGGGCTGGAGAAGCCTCCCTCATTCCTCCCAGGAATTAATAAATGTGAAGAGA	309884
A_24_P721744	A1BG-AS46	-0.624823	A	868000	1.0225e+06	FLJ23614	NR_015380	NR_015380	NR_015380	A1BG-AS46	chr19:058866199-058866303		Hs.709582		Homo sapiens A1BG antisense RNA 1 (non-protein coding) (A1BG-AS1), non-coding RNA [NR_015380]	hs|19q13.43	NP82889573		A1BG antisense RNA 1 (non-protein coding)	AGGGTGTGCACAGAACTCAGAAGTCAGACCACTGAACAGTGACAGAACCTTTCAGCCCAT	310525					FLI_CDNA; oligo capping; fis (full insert sequence)					12477977
A_23_P104269	A1CF	-0.630265	P	870746	1.02574e+06	ACF; ASP; ACF64; ACF65; MGC163391; RP11-564C4.47	NM_138933	NM_138933	NM_138933	A1CF	chr10:052570857-052570845	GO:0000166(nucleotide binding)|GO:0003676(nucleic acid binding)|GO:0003723(RNA binding)|GO:0003725(double-stranded RNA binding)|GO:0003727(single-stranded RNA binding)|GO:0003729(mRNA binding)|GO:0004131(cytosine deaminase activity)|GO:0005515(protein binding)|GO:0005622(intracellular)|GO:0005634(nucleus)|GO:0005654(nucleoplasm)|GO:0005720(nuclear heterochromatin)|GO:0005737(cytoplasm)|GO:0005783…	Hs.282795	ENST00000395489	Homo sapiens APOBEC1 complementation factor (A1CF), transcript variant 3, mRNA [NM_138933]	hs|10q11.68	NP83823398	GO:0000166(nucleotide binding)|GO:0003725(double-stranded RNA binding)|GO:0003727(single-stranded RNA binding)|GO:0005515(protein binding)|GO:0005634(nucleus)|GO:0005737(cytoplasm)|GO:0005783(endoplasmic reticulum)|GO:0006397(mRNA processing)|GO:0030895(apolipoprotein B mRNA editing enzyme complex)|GO:0050821(protein stabilization)	APOBEC1 complementation factor	GACAGCTATTCTTGTACAAAATAACTATTCCTGCTCTAGCCAGCCAGAATCCTGCAATCC	311165	GO:30895(apolipoprotein B mRNA editing enzyme complex); GO:5737(cytoplasm); GO:5634(nucleus)	GO:3725(double-stranded RNA binding); GO:3676(nucleic acid binding); GO:166(nucleotide binding); GO:5515(protein binding); GO:3727(single-stranded RNA binding)	Mammalian apolipoprotein B mRNA undergoes site-specific C to U deamination, which is mediated by a multi-component enzyme complex containing a minimal core composed of APOBEC-1 and a complementation factor encoded by this gene. The gene product has three non-identical RNA recognition motifs and belongs to the hnRNP R family of RNA-binding proteins. It has been proposed that this complementation f…	GO:6381(mRNA editing); GO:6397(mRNA processing); GO:50821(protein stabilization)			apobec-1 complementation factor isoform 48			16055734; 15164054; 15148397; 14702039; 12896982; 12881431; 12477932; 11871661; 11815617; 11752456; 11718896; 11577082; 11571303; 11352648; 11329013; 11134005; 11072063; 10833526; 10781591; 10669804
A_32_P110917	A2LD46	-0.635707	P	873492	1.02897e+06	LOC87814	NM_033110	NM_033110	NM_033110	A2LD46	chr13:101183916-101183902	GO:0003839(gamma-glutamylcyclotransferase activity)|GO:0016746(transferase activity, transferring acyl groups)|GO:0042219(cellular modified amino acid catabolic process)	Hs.350868	ENST00000455100	Homo sapiens AIG2-like domain 1 (A2LD1), transcript variant 1, mRNA [NM_033110]	hs|13q32.48	THC2610235		AIG2-like domain 46	GCTGTATATCAGAGTGCGTATAGCACCATTCTTCCTAATTTTCAGATCAAGCTTCACAGC	311806		GO:0005554(molecular function unknown)					LOC87769 protein			14702039; 12477977
A_23_P116943	A2M	-0.641149	P	876238	1.03221e+06	CPAMD5; FWP007; S863-7; alpha 2M; DKFZp779B131	NM_000014	NM_000014	NM_000014	A2M	chr12:009221418-009221404	GO:0001869(negative regulation of complement activation, lectin pathway)|GO:0002576(platelet degranulation)|GO:0004867(serine-type endopeptidase inhibitor activity)|GO:0005515(protein binding)|GO:0005576(extracellular region)|GO:0005615(extracellular space)|GO:0005829(cytosol)|GO:0007264(small GTPase mediated signal transduction)|GO:0007596(blood coagulation)|GO:0007597(blood coagulation, intrins…	Hs.212838	ENST00000540099	Homo sapiens alpha-2-macroglobulin (A2M), mRNA [NM_000014]	hs|12p13.31	NP1422612	GO:0001869(negative regulation of complement activation, lectin pathway)|GO:0004867(serine-type endopeptidase inhibitor activity)|GO:0005576(extracellular region)|GO:0005615(extracellular space)|GO:0006953(acute-phase response)|GO:0007584(response to nutrient)|GO:0010037(response to carbon dioxide)|GO:0019899(enzyme binding)|GO:0019959(interleukin-8 binding)|GO:0019966(interleukin-1 binding)|GO:0…	alpha-2-macroglobulin	CTTGTTCTTCACGGTTCTGCAAGATGTCCCAGTAAGAGATCTGAAACCAGCCATAGTGAA	312446	GO:5576(extracellular region)	GO:19899(enzyme binding); GO:19966(interleukin-1 binding); GO:19959(interleukin-8 binding); GO:8320(protein carrier activity); GO:4867(serine-type endopeptidase inhibitor activity); GO:43120(tumor necrosis factor binding); GO:17114(wide-spectrum protease inhibitor activity)	Alpha-2-macroglobulin is a protease inhibitor and cytokine transporter. It inhibits many proteases, including trypsin, thrombin and collagenase. A2M is implicated in Alzheimer disease (AD) due to its ability to mediate the clearance and degradation of A-beta, the major component of beta-amyloid deposits.	GO:6886(intracellular protein transport); GO:51260(protein homooligomerization)			alpha-2-macroglobulin precursor	Alzheimer disease, susceptibility to; Emphysema due to alpha-2-macroglobulin deficiency	KEGG pathway: Alzheimer's disease 05010; KEGG pathway: Complement and coagulation cascades 04610; Reactome Event:Hemostasis 109627	17071617; 16910174; 16784755; 16641085; 16407218; 16335952; 16297527; 16232083; 15931081; 15910735; 15908432; 15611997; 15511627; 15489334; 15023809; 14760718; 14718574; 14715656; 14678766; 14675603; 14637088; 14506912; 12966032; 12755687; 12755614; 12754519; 12631277; 12477932; 12221172; 12194978; 12175343; 12062545; 12042276; 12015318; 11916201; 11910179; 11901360; 11823454; 11811950; 11435418;…
A_33_P3525308	A2ML46	-0.646591	A	878984	1.03544e+06		NM_144670	NM_144670	NM_144670	A2ML46	chr12:009027061-009027165	GO:0004867(serine-type endopeptidase inhibitor activity)|GO:0005576(extracellular region)|GO:0005615(extracellular space)|GO:0010466(negative regulation of peptidase activity)|GO:0030414(peptidase inhibitor activity)|GO:0052548(regulation of endopeptidase activity)	Hs.620532	ENST00000541459	Homo sapiens alpha-2-macroglobulin-like 1 (A2ML1), mRNA [NM_144670]	hs|12p13.31	NP1425531	GO:0004867(serine-type endopeptidase inhibitor activity)|GO:0005515(protein binding)|GO:0005576(extracellular region)|GO:0005615(extracellular space)|GO:0052548(regulation of endopeptidase activity)	alpha-2-macroglobulin-like 46	AAAGTGTGCTGGTCACCAACTTGAAACCAGCAACCATCAAGGTCTATGACTACTACCTAC	313087
A_24_P151167	A1BG	-0.652033	A	881730	1.03867e+06	A1B; ABG; GAB; HYST2477; DKFZp686F1016				A1BG	chr19:058857206-058857193	GO:0003674(molecular_function)|GO:0005576(extracellular region)|GO:0008150(biological_process)	Hs.529161		Homo sapiens cDNA FLJ31639 fis, clone NT2RI2003655, weakly similar to ZINC FINGER PROTEIN 195. [AK056201]	hs|19q13.43	THC2461029		alpha-1-B glycoprotein	GCTAGTGATCTGGTTTACTGCCTTAGTAATATCTAGTTCCTAATATGCCTATGCCTTTTA	313727	GO:5576(extracellular region)	GO:3674(molecular_function)	The protein encoded by this gene is a plasma glycoprotein of unknown function. The protein shows sequence similarity to the variable regions of some immunoglobulin supergene family member proteins.	GO:8150(biological_process)			alpha 1B-glycoprotein			16335952; 15489334; 15461460; 15221005; 14760718; 14702039; 12477932; 8889549; 3610142; 3458201; 2591113
A_33_P3685262	A1BG	-0.657474	P	884476	1.04191e+06		NM_130786	NM_130786	NM_130786	A1BG	chr19:058858293-058858280	GO:0003674(molecular_function)|GO:0005576(extracellular region)|GO:0008150(biological_process)	Hs.529161	ENST00000263100	Homo sapiens alpha-1-B glycoprotein (A1BG), mRNA [NM_130786]	hs|19q13.43	THC2461029	GO:0003674(molecular_function)|GO:0005576(extracellular region)|GO:0008150(biological_process)	alpha-1-B glycoprotein	TCTCTGGGGGGCTGGAGAAGCCTCCCTCATTCCTCCCAGGAATTAATAAATGTGAAGAGA	314368
A_24_P721745	A1BG-AS47	-0.662916	A	887222	1.04514e+06	FLJ23615	NR_015380	NR_015380	NR_015380	A1BG-AS47	chr19:058866199-058866304		Hs.709582		Homo sapiens A1BG antisense RNA 1 (non-protein coding) (A1BG-AS1), non-coding RNA [NR_015380]	hs|19q13.43	NP84757223		A1BG antisense RNA 1 (non-protein coding)	AGGGTGTGCACAGAACTCAGAAGTCAGACCACTGAACAGTGACAGAACCTTTCAGCCCAT	315008					FLI_CDNA; oligo capping; fis (full insert sequence)					12477978
A_23_P104270	A1CF	-0.668358	P	889968	1.04838e+06	ACF; ASP; ACF64; ACF65; MGC163391; RP11-564C4.48	NM_138933	NM_138933	NM_138933	A1CF	chr10:052570857-052570846	GO:0000166(nucleotide binding)|GO:0003676(nucleic acid binding)|GO:0003723(RNA binding)|GO:0003725(double-stranded RNA binding)|GO:0003727(single-stranded RNA binding)|GO:0003729(mRNA binding)|GO:0004131(cytosine deaminase activity)|GO:0005515(protein binding)|GO:0005622(intracellular)|GO:0005634(nucleus)|GO:0005654(nucleoplasm)|GO:0005720(nuclear heterochromatin)|GO:0005737(cytoplasm)|GO:0005783…	Hs.282795	ENST00000395489	Homo sapiens APOBEC1 complementation factor (A1CF), transcript variant 3, mRNA [NM_138933]	hs|10q11.69	NP85691048	GO:0000166(nucleotide binding)|GO:0003725(double-stranded RNA binding)|GO:0003727(single-stranded RNA binding)|GO:0005515(protein binding)|GO:0005634(nucleus)|GO:0005737(cytoplasm)|GO:0005783(endoplasmic reticulum)|GO:0006397(mRNA processing)|GO:0030895(apolipoprotein B mRNA editing enzyme complex)|GO:0050821(protein stabilization)	APOBEC1 complementation factor	GACAGCTATTCTTGTACAAAATAACTATTCCTGCTCTAGCCAGCCAGAATCCTGCAATCC	315649	GO:30895(apolipoprotein B mRNA editing enzyme complex); GO:5737(cytoplasm); GO:5634(nucleus)	GO:3725(double-stranded RNA binding); GO:3676(nucleic acid binding); GO:166(nucleotide binding); GO:5515(protein binding); GO:3727(single-stranded RNA binding)	Mammalian apolipoprotein B mRNA undergoes site-specific C to U deamination, which is mediated by a multi-component enzyme complex containing a minimal core composed of APOBEC-1 and a complementation factor encoded by this gene. The gene product has three non-identical RNA recognition motifs and belongs to the hnRNP R family of RNA-binding proteins. It has been proposed that this complementation f…	GO:6381(mRNA editing); GO:6397(mRNA processing); GO:50821(protein stabilization)			apobec-1 complementation factor isoform 49			16055734; 15164054; 15148397; 14702039; 12896982; 12881431; 12477932; 11871661; 11815617; 11752456; 11718896; 11577082; 11571303; 11352648; 11329013; 11134005; 11072063; 10833526; 10781591; 10669805
A_32_P110918	A2LD47	-0.6738	P	892714	1.05161e+06	LOC87815	NM_033110	NM_033110	NM_033110	A2LD47	chr13:101183916-101183903	GO:0003839(gamma-glutamylcyclotransferase activity)|GO:0016746(transferase activity, transferring acyl groups)|GO:0042219(cellular modified amino acid catabolic process)	Hs.350868	ENST00000455100	Homo sapiens AIG2-like domain 1 (A2LD1), transcript variant 1, mRNA [NM_033110]	hs|13q32.49	THC2610236		AIG2-like domain 47	GCTGTATATCAGAGTGCGTATAGCACCATTCTTCCTAATTTTCAGATCAAGCTTCACAGC	316289		GO:0005554(molecular function unknown)					LOC87769 protein			14702039; 12477978
A_23_P116944	A2M	-0.679242	P	895459	1.05485e+06	CPAMD5; FWP007; S863-7; alpha 2M; DKFZp779B132	NM_000014	NM_000014	NM_000014	A2M	chr12:009221418-009221405	GO:0001869(negative regulation of complement activation, lectin pathway)|GO:0002576(platelet degranulation)|GO:0004867(serine-type endopeptidase inhibitor activity)|GO:0005515(protein binding)|GO:0005576(extracellular region)|GO:0005615(extracellular space)|GO:0005829(cytosol)|GO:0007264(small GTPase mediated signal transduction)|GO:0007596(blood coagulation)|GO:0007597(blood coagulation, intrins…	Hs.212838	ENST00000540099	Homo sapiens alpha-2-macroglobulin (A2M), mRNA [NM_000014]	hs|12p13.31	NP1428450	GO:0001869(negative regulation of complement activation, lectin pathway)|GO:0004867(serine-type endopeptidase inhibitor activity)|GO:0005576(extracellular region)|GO:0005615(extracellular space)|GO:0006953(acute-phase response)|GO:0007584(response to nutrient)|GO:0010037(response to carbon dioxide)|GO:0019899(enzyme binding)|GO:0019959(interleukin-8 binding)|GO:0019966(interleukin-1 binding)|GO:0…	alpha-2-macroglobulin	CTTGTTCTTCACGGTTCTGCAAGATGTCCCAGTAAGAGATCTGAAACCAGCCATAGTGAA	316930	GO:5576(extracellular region)	GO:19899(enzyme binding); GO:19966(interleukin-1 binding); GO:19959(interleukin-8 binding); GO:8320(protein carrier activity); GO:4867(serine-type endopeptidase inhibitor activity); GO:43120(tumor necrosis factor binding); GO:17114(wide-spectrum protease inhibitor activity)	Alpha-2-macroglobulin is a protease inhibitor and cytokine transporter. It inhibits many proteases, including trypsin, thrombin and collagenase. A2M is implicated in Alzheimer disease (AD) due to its ability to mediate the clearance and degradation of A-beta, the major component of beta-amyloid deposits.	GO:6886(intracellular protein transport); GO:51260(protein homooligomerization)			alpha-2-macroglobulin precursor	Alzheimer disease, susceptibility to; Emphysema due to alpha-2-macroglobulin deficiency	KEGG pathway: Alzheimer's disease 05010; KEGG pathway: Complement and coagulation cascades 04610; Reactome Event:Hemostasis 109628	17071617; 16910174; 16784755; 16641085; 16407218; 16335952; 16297527; 16232083; 15931081; 15910735; 15908432; 15611997; 15511627; 15489334; 15023809; 14760718; 14718574; 14715656; 14678766; 14675603; 14637088; 14506912; 12966032; 12755687; 12755614; 12754519; 12631277; 12477932; 12221172; 12194978; 12175343; 12062545; 12042276; 12015318; 11916201; 11910179; 11901360; 11823454; 11811950; 11435418;…
A_33_P3525309	A2ML47	-0.684684	A	898205	1.05808e+06		NM_144670	NM_144670	NM_144670	A2ML47	chr12:009027061-009027166	GO:0004867(serine-type endopeptidase inhibitor activity)|GO:0005576(extracellular region)|GO:0005615(extracellular space)|GO:0010466(negative regulation of peptidase activity)|GO:0030414(peptidase inhibitor activity)|GO:0052548(regulation of endopeptidase activity)	Hs.620532	ENST00000541459	Homo sapiens alpha-2-macroglobulin-like 1 (A2ML1), mRNA [NM_144670]	hs|12p13.31	NP1431369	GO:0004867(serine-type endopeptidase inhibitor activity)|GO:0005515(protein binding)|GO:0005576(extracellular region)|GO:0005615(extracellular space)|GO:0052548(regulation of endopeptidase activity)	alpha-2-macroglobulin-like 47	AAAGTGTGCTGGTCACCAACTTGAAACCAGCAACCATCAAGGTCTATGACTACTACCTAC	317570
A_24_P151168	A1BG	-0.690126	A	900951	1.06132e+06	A1B; ABG; GAB; HYST2477; DKFZp686F1017				A1BG	chr19:058857206-058857194	GO:0003674(molecular_function)|GO:0005576(extracellular region)|GO:0008150(biological_process)	Hs.529161		Homo sapiens cDNA FLJ31639 fis, clone NT2RI2003655, weakly similar to ZINC FINGER PROTEIN 195. [AK056201]	hs|19q13.43	THC2461029		alpha-1-B glycoprotein	GCTAGTGATCTGGTTTACTGCCTTAGTAATATCTAGTTCCTAATATGCCTATGCCTTTTA	318211	GO:5576(extracellular region)	GO:3674(molecular_function)	The protein encoded by this gene is a plasma glycoprotein of unknown function. The protein shows sequence similarity to the variable regions of some immunoglobulin supergene family member proteins.	GO:8150(biological_process)			alpha 1B-glycoprotein			16335952; 15489334; 15461460; 15221005; 14760718; 14702039; 12477932; 8889549; 3610142; 3458201; 2591114
A_33_P3685263	A1BG	-0.695568	P	903697	1.06455e+06		NM_130786	NM_130786	NM_130786	A1BG	chr19:058858293-058858281	GO:0003674(molecular_function)|GO:0005576(extracellular region)|GO:0008150(biological_process)	Hs.529161	ENST00000263100	Homo sapiens alpha-1-B glycoprotein (A1BG), mRNA [NM_130786]	hs|19q13.43	THC2461029	GO:0003674(molecular_function)|GO:0005576(extracellular region)|GO:0008150(biological_process)	alpha-1-B glycoprotein	TCTCTGGGGGGCTGGAGAAGCCTCCCTCATTCCTCCCAGGAATTAATAAATGTGAAGAGA	318851
A_24_P721746	A1BG-AS48	-0.701009	A	906443	1.06779e+06	FLJ23616	NR_015380	NR_015380	NR_015380	A1BG-AS48	chr19:058866199-058866305		Hs.709582		Homo sapiens A1BG antisense RNA 1 (non-protein coding) (A1BG-AS1), non-coding RNA [NR_015380]	hs|19q13.43	NP86624873		A1BG antisense RNA 1 (non-protein coding)	AGGGTGTGCACAGAACTCAGAAGTCAGACCACTGAACAGTGACAGAACCTTTCAGCCCAT	319492					FLI_CDNA; oligo capping; fis (full insert sequence)					12477979
A_23_P104271	A1CF	-0.706451	P	909189	1.07102e+06	ACF; ASP; ACF64; ACF65; MGC163391; RP11-564C4.49	NM_138933	NM_138933	NM_138933	A1CF	chr10:052570857-052570847	GO:0000166(nucleotide binding)|GO:0003676(nucleic acid binding)|GO:0003723(RNA binding)|GO:0003725(double-stranded RNA binding)|GO:0003727(single-stranded RNA binding)|GO:0003729(mRNA binding)|GO:0004131(cytosine deaminase activity)|GO:0005515(protein binding)|GO:0005622(intracellular)|GO:0005634(nucleus)|GO:0005654(nucleoplasm)|GO:0005720(nuclear heterochromatin)|GO:0005737(cytoplasm)|GO:0005783…	Hs.282795	ENST00000395489	Homo sapiens APOBEC1 complementation factor (A1CF), transcript variant 3, mRNA [NM_138933]	hs|10q11.70	NP87558698	GO:0000166(nucleotide binding)|GO:0003725(double-stranded RNA binding)|GO:0003727(single-stranded RNA binding)|GO:0005515(protein binding)|GO:0005634(nucleus)|GO:0005737(cytoplasm)|GO:0005783(endoplasmic reticulum)|GO:0006397(mRNA processing)|GO:0030895(apolipoprotein B mRNA editing enzyme complex)|GO:0050821(protein stabilization)	APOBEC1 complementation factor	GACAGCTATTCTTGTACAAAATAACTATTCCTGCTCTAGCCAGCCAGAATCCTGCAATCC	320132	GO:30895(apolipoprotein B mRNA editing enzyme complex); GO:5737(cytoplasm); GO:5634(nucleus)	GO:3725(double-stranded RNA binding); GO:3676(nucleic acid binding); GO:166(nucleotide binding); GO:5515(protein binding); GO:3727(single-stranded RNA binding)	Mammalian apolipoprotein B mRNA undergoes site-specific C to U deamination, which is mediated by a multi-component enzyme complex containing a minimal core composed of APOBEC-1 and a complementation factor encoded by this gene. The gene product has three non-identical RNA recognition motifs and belongs to the hnRNP R family of RNA-binding proteins. It has been proposed that this complementation f…	GO:6381(mRNA editing); GO:6397(mRNA processing); GO:50821(protein stabilization)			apobec-1 complementation factor isoform 50			16055734; 15164054; 15148397; 14702039; 12896982; 12881431; 12477932; 11871661; 11815617; 11752456; 11718896; 11577082; 11571303; 11352648; 11329013; 11134005; 11072063; 10833526; 10781591; 10669806
A_32_P110919	A2LD48	-0.711893	P	911935	1.07426e+06	LOC87816	NM_033110	NM_033110	NM_033110	A2LD48	chr13:101183916-101183904	GO:0003839(gamma-glutamylcyclotransferase activity)|GO:0016746(transferase activity, transferring acyl groups)|GO:0042219(cellular modified amino acid catabolic process)	Hs.350868	ENST00000455100	Homo sapiens AIG2-like domain 1 (A2LD1), transcript variant 1, mRNA [NM_033110]	hs|13q32.50	THC2610237		AIG2-like domain 48	GCTGTATATCAGAGTGCGTATAGCACCATTCTTCCTAATTTTCAGATCAAGCTTCACAGC	320773		GO:0005554(molecular function unknown)					LOC87769 protein			14702039; 12477979
A_23_P116945	A2M	-0.717335	P	914681	1.07749e+06	CPAMD5; FWP007; S863-7; alpha 2M; DKFZp779B133	NM_000014	NM_000014	NM_000014	A2M	chr12:009221418-009221406	GO:0001869(negative regulation of complement activation, lectin pathway)|GO:0002576(platelet degranulation)|GO:0004867(serine-type endopeptidase inhibitor activity)|GO:0005515(protein binding)|GO:0005576(extracellular region)|GO:0005615(extracellular space)|GO:0005829(cytosol)|GO:0007264(small GTPase mediated signal transduction)|GO:0007596(blood coagulation)|GO:0007597(blood coagulation, intrins…	Hs.212838	ENST00000540099	Homo sapiens alpha-2-macroglobulin (A2M), mRNA [NM_000014]	hs|12p13.31	NP1434288	GO:0001869(negative regulation of complement activation, lectin pathway)|GO:0004867(serine-type endopeptidase inhibitor activity)|GO:0005576(extracellular region)|GO:0005615(extracellular space)|GO:0006953(acute-phase response)|GO:0007584(response to nutrient)|GO:0010037(response to carbon dioxide)|GO:0019899(enzyme binding)|GO:0019959(interleukin-8 binding)|GO:0019966(interleukin-1 binding)|GO:0…	alpha-2-macroglobulin	CTTGTTCTTCACGGTTCTGCAAGATGTCCCAGTAAGAGATCTGAAACCAGCCATAGTGAA	321413	GO:5576(extracellular region)	GO:19899(enzyme binding); GO:19966(interleukin-1 binding); GO:19959(interleukin-8 binding); GO:8320(protein carrier activity); GO:4867(serine-type endopeptidase inhibitor activity); GO:43120(tumor necrosis factor binding); GO:17114(wide-spectrum protease inhibitor activity)	Alpha-2-macroglobulin is a protease inhibitor and cytokine transporter. It inhibits many proteases, including trypsin, thrombin and collagenase. A2M is implicated in Alzheimer disease (AD) due to its ability to mediate the clearance and degradation of A-beta, the major component of beta-amyloid deposits.	GO:6886(intracellular protein transport); GO:51260(protein homooligomerization)			alpha-2-macroglobulin precursor	Alzheimer disease, susceptibility to; Emphysema due to alpha-2-macroglobulin deficiency	KEGG pathway: Alzheimer's disease 05010; KEGG pathway: Complement and coagulation cascades 04610; Reactome Event:Hemostasis 109629	17071617; 16910174; 16784755; 16641085; 16407218; 16335952; 16297527; 16232083; 15931081; 15910735; 15908432; 15611997; 15511627; 15489334; 15023809; 14760718; 14718574; 14715656; 14678766; 14675603; 14637088; 14506912; 12966032; 12755687; 12755614; 12754519; 12631277; 12477932; 12221172; 12194978; 12175343; 12062545; 12042276; 12015318; 11916201; 11910179; 11901360; 11823454; 11811950; 11435418;…
A_33_P3525310	A2ML48	-0.722777	A	917427	1.08073e+06		NM_144670	NM_144670	NM_144670	A2ML48	chr12:009027061-009027167	GO:0004867(serine-type endopeptidase inhibitor activity)|GO:0005576(extracellular region)|GO:0005615(extracellular space)|GO:0010466(negative regulation of peptidase activity)|GO:0030414(peptidase inhibitor activity)|GO:0052548(regulation of endopeptidase activity)	Hs.620532	ENST00000541459	Homo sapiens alpha-2-macroglobulin-like 1 (A2ML1), mRNA [NM_144670]	hs|12p13.31	NP1437207	GO:0004867(serine-type endopeptidase inhibitor activity)|GO:0005515(protein binding)|GO:0005576(extracellular region)|GO:0005615(extracellular space)|GO:0052548(regulation of endopeptidase activity)	alpha-2-macroglobulin-like 48	AAAGTGTGCTGGTCACCAACTTGAAACCAGCAACCATCAAGGTCTATGACTACTACCTAC	322054
A_24_P151169	A1BG	-0.728219	A	920173	1.08396e+06	A1B; ABG; GAB; HYST2477; DKFZp686F1018				A1BG	chr19:058857206-058857195	GO:0003674(molecular_function)|GO:0005576(extracellular region)|GO:0008150(biological_process)	Hs.529161		Homo sapiens cDNA FLJ31639 fis, clone NT2RI2003655, weakly similar to ZINC FINGER PROTEIN 195. [AK056201]	hs|19q13.43	THC2461029		alpha-1-B glycoprotein	GCTAGTGATCTGGTTTACTGCCTTAGTAATATCTAGTTCCTAATATGCCTATGCCTTTTA	322694	GO:5576(extracellular region)	GO:3674(molecular_function)	The protein encoded by this gene is a plasma glycoprotein of unknown function. The protein shows sequence similarity to the variable regions of some immunoglobulin supergene family member proteins.	GO:8150(biological_process)			alpha 1B-glycoprotein			16335952; 15489334; 15461460; 15221005; 14760718; 14702039; 12477932; 8889549; 3610142; 3458201; 2591115
A_33_P3685264	A1BG	-0.733661	P	922919	1.08719e+06		NM_130786	NM_130786	NM_130786	A1BG	chr19:058858293-058858282	GO:0003674(molecular_function)|GO:0005576(extracellular region)|GO:0008150(biological_process)	Hs.529161	ENST00000263100	Homo sapiens alpha-1-B glycoprotein (A1BG), mRNA [NM_130786]	hs|19q13.43	THC2461029	GO:0003674(molecular_function)|GO:0005576(extracellular region)|GO:0008150(biological_process)	alpha-1-B glycoprotein	TCTCTGGGGGGCTGGAGAAGCCTCCCTCATTCCTCCCAGGAATTAATAAATGTGAAGAGA	323335
A_24_P721747	A1BG-AS49	-0.739103	A	925665	1.09043e+06	FLJ23617	NR_015380	NR_015380	NR_015380	A1BG-AS49	chr19:058866199-058866306		Hs.709582		Homo sapiens A1BG antisense RNA 1 (non-protein coding) (A1BG-AS1), non-coding RNA [NR_015380]	hs|19q13.43	NP88492523		A1BG antisense RNA 1 (non-protein coding)	AGGGTGTGCACAGAACTCAGAAGTCAGACCACTGAACAGTGACAGAACCTTTCAGCCCAT	323975					FLI_CDNA; oligo capping; fis (full insert sequence)					12477980
A_23_P104272	A1CF	-0.744544	P	928411	1.09366e+06	ACF; ASP; ACF64; ACF65; MGC163391; RP11-564C4.50	NM_138933	NM_138933	NM_138933	A1CF	chr10:052570857-052570848	GO:0000166(nucleotide binding)|GO:0003676(nucleic acid binding)|GO:0003723(RNA binding)|GO:0003725(double-stranded RNA binding)|GO:0003727(single-stranded RNA binding)|GO:0003729(mRNA binding)|GO:0004131(cytosine deaminase activity)|GO:0005515(protein binding)|GO:0005622(intracellular)|GO:0005634(nucleus)|GO:0005654(nucleoplasm)|GO:0005720(nuclear heterochromatin)|GO:0005737(cytoplasm)|GO:0005783…	Hs.282795	ENST00000395489	Homo sapiens APOBEC1 complementation factor (A1CF), transcript variant 3, mRNA [NM_138933]	hs|10q11.71	NP89426348	GO:0000166(nucleotide binding)|GO:0003725(double-stranded RNA binding)|GO:0003727(single-stranded RNA binding)|GO:0005515(protein binding)|GO:0005634(nucleus)|GO:0005737(cytoplasm)|GO:0005783(endoplasmic reticulum)|GO:0006397(mRNA processing)|GO:0030895(apolipoprotein B mRNA editing enzyme complex)|GO:0050821(protein stabilization)	APOBEC1 complementation factor	GACAGCTATTCTTGTACAAAATAACTATTCCTGCTCTAGCCAGCCAGAATCCTGCAATCC	324616	GO:30895(apolipoprotein B mRNA editing enzyme complex); GO:5737(cytoplasm); GO:5634(nucleus)	GO:3725(double-stranded RNA binding); GO:3676(nucleic acid binding); GO:166(nucleotide binding); GO:5515(protein binding); GO:3727(single-stranded RNA binding)	Mammalian apolipoprotein B mRNA undergoes site-specific C to U deamination, which is mediated by a multi-component enzyme complex containing a minimal core composed of APOBEC-1 and a complementation factor encoded by this gene. The gene product has three non-identical RNA recognition motifs and belongs to the hnRNP R family of RNA-binding proteins. It has been proposed that this complementation f…	GO:6381(mRNA editing); GO:6397(mRNA processing); GO:50821(protein stabilization)			apobec-1 complementation factor isoform 51			16055734; 15164054; 15148397; 14702039; 12896982; 12881431; 12477932; 11871661; 11815617; 11752456; 11718896; 11577082; 11571303; 11352648; 11329013; 11134005; 11072063; 10833526; 10781591; 10669807
A_32_P110920	A2LD49	-0.749986	P	931157	1.0969e+06	LOC87817	NM_033110	NM_033110	NM_033110	A2LD49	chr13:101183916-101183905	GO:0003839(gamma-glutamylcyclotransferase activity)|GO:0016746(transferase activity, transferring acyl groups)|GO:0042219(cellular modified amino acid catabolic process)	Hs.350868	ENST00000455100	Homo sapiens AIG2-like domain 1 (A2LD1), transcript variant 1, mRNA [NM_033110]	hs|13q32.51	THC2610238		AIG2-like domain 49	GCTGTATATCAGAGTGCGTATAGCACCATTCTTCCTAATTTTCAGATCAAGCTTCACAGC	325256		GO:0005554(molecular function unknown)					LOC87769 protein			14702039; 12477980
A_23_P116946	A2M	-0.755428	P	933903	1.10013e+06	CPAMD5; FWP007; S863-7; alpha 2M; DKFZp779B134	NM_000014	NM_000014	NM_000014	A2M	chr12:009221418-009221407	GO:0001869(negative regulation of complement activation, lectin pathway)|GO:0002576(platelet degranulation)|GO:0004867(serine-type endopeptidase inhibitor activity)|GO:0005515(protein binding)|GO:0005576(extracellular region)|GO:0005615(extracellular space)|GO:0005829(cytosol)|GO:0007264(small GTPase mediated signal transduction)|GO:0007596(blood coagulation)|GO:0007597(blood coagulation, intrins…	Hs.212838	ENST00000540099	Homo sapiens alpha-2-macroglobulin (A2M), mRNA [NM_000014]	hs|12p13.31	NP1440126	GO:0001869(negative regulation of complement activation, lectin pathway)|GO:0004867(serine-type endopeptidase inhibitor activity)|GO:0005576(extracellular region)|GO:0005615(extracellular space)|GO:0006953(acute-phase response)|GO:0007584(response to nutrient)|GO:0010037(response to carbon dioxide)|GO:0019899(enzyme binding)|GO:0019959(interleukin-8 binding)|GO:0019966(interleukin-1 binding)|GO:0…	alpha-2-macroglobulin	CTTGTTCTTCACGGTTCTGCAAGATGTCCCAGTAAGAGATCTGAAACCAGCCATAGTGAA	325897	GO:5576(extracellular region)	GO:19899(enzyme binding); GO:19966(interleukin-1 binding); GO:19959(interleukin-8 binding); GO:8320(protein carrier activity); GO:4867(serine-type endopeptidase inhibitor activity); GO:43120(tumor necrosis factor binding); GO:17114(wide-spectrum protease inhibitor activity)	Alpha-2-macroglobulin is a protease inhibitor and cytokine transporter. It inhibits many proteases, including trypsin, thrombin and collagenase. A2M is implicated in Alzheimer disease (AD) due to its ability to mediate the clearance and degradation of A-beta, the major component of beta-amyloid deposits.	GO:6886(intracellular protein transport); GO:51260(protein homooligomerization)			alpha-2-macroglobulin precursor	Alzheimer disease, susceptibility to; Emphysema due to alpha-2-macroglobulin deficiency	KEGG pathway: Alzheimer's disease 05010; KEGG pathway: Complement and coagulation cascades 04610; Reactome Event:Hemostasis 109630	17071617; 16910174; 16784755; 16641085; 16407218; 16335952; 16297527; 16232083; 15931081; 15910735; 15908432; 15611997; 15511627; 15489334; 15023809; 14760718; 14718574; 14715656; 14678766; 14675603; 14637088; 14506912; 12966032; 12755687; 12755614; 12754519; 12631277; 12477932; 12221172; 12194978; 12175343; 12062545; 12042276; 12015318; 11916201; 11910179; 11901360; 11823454; 11811950; 11435418;…
A_33_P3525311	A2ML49	-0.76087	A	936648	1.10337e+06		NM_144670	NM_144670	NM_144670	A2ML49	chr12:009027061-009027168	GO:0004867(serine-type endopeptidase inhibitor activity)|GO:0005576(extracellular region)|GO:0005615(extracellular space)|GO:0010466(negative regulation of peptidase activity)|GO:0030414(peptidase inhibitor activity)|GO:0052548(regulation of endopeptidase activity)	Hs.620532	ENST00000541459	Homo sapiens alpha-2-macroglobulin-like 1 (A2ML1), mRNA [NM_144670]	hs|12p13.31	NP1443045	GO:0004867(serine-type endopeptidase inhibitor activity)|GO:0005515(protein binding)|GO:0005576(extracellular region)|GO:0005615(extracellular space)|GO:0052548(regulation of endopeptidase activity)	alpha-2-macroglobulin-like 49	AAAGTGTGCTGGTCACCAACTTGAAACCAGCAACCATCAAGGTCTATGACTACTACCTAC	326537
A_24_P151170	A1BG	-0.766312	A	939394	1.1066e+06	A1B; ABG; GAB; HYST2477; DKFZp686F1019				A1BG	chr19:058857206-058857196	GO:0003674(molecular_function)|GO:0005576(extracellular region)|GO:0008150(biological_process)	Hs.529161		Homo sapiens cDNA FLJ31639 fis, clone NT2RI2003655, weakly similar to ZINC FINGER PROTEIN 195. [AK056201]	hs|19q13.43	THC2461029		alpha-1-B glycoprotein	GCTAGTGATCTGGTTTACTGCCTTAGTAATATCTAGTTCCTAATATGCCTATGCCTTTTA	327178	GO:5576(extracellular region)	GO:3674(molecular_function)	The protein encoded by this gene is a plasma glycoprotein of unknown function. The protein shows sequence similarity to the variable regions of some immunoglobulin supergene family member proteins.	GO:8150(biological_process)			alpha 1B-glycoprotein			16335952; 15489334; 15461460; 15221005; 14760718; 14702039; 12477932; 8889549; 3610142; 3458201; 2591116
A_33_P3685265	A1BG	-0.771754	P	942140	1.10984e+06		NM_130786	NM_130786	NM_130786	A1BG	chr19:058858293-058858283	GO:0003674(molecular_function)|GO:0005576(extracellular region)|GO:0008150(biological_process)	Hs.529161	ENST00000263100	Homo sapiens alpha-1-B glycoprotein (A1BG), mRNA [NM_130786]	hs|19q13.43	THC2461029	GO:0003674(molecular_function)|GO:0005576(extracellular region)|GO:0008150(biological_process)	alpha-1-B glycoprotein	TCTCTGGGGGGCTGGAGAAGCCTCCCTCATTCCTCCCAGGAATTAATAAATGTGAAGAGA	327818
A_24_P721748	A1BG-AS50	-0.777196	A	944886	1.11307e+06	FLJ23618	NR_015380	NR_015380	NR_015380	A1BG-AS50	chr19:058866199-058866307		Hs.709582		Homo sapiens A1BG antisense RNA 1 (non-protein coding) (A1BG-AS1), non-coding RNA [NR_015380]	hs|19q13.43	NP90360173		A1BG antisense RNA 1 (non-protein coding)	AGGGTGTGCACAGAACTCAGAAGTCAGACCACTGAACAGTGACAGAACCTTTCAGCCCAT	328459					FLI_CDNA; oligo capping; fis (full insert sequence)					12477981
A_23_P104273	A1CF	-0.782638	P	947632	1.11631e+06	ACF; ASP; ACF64; ACF65; MGC163391; RP11-564C4.51	NM_138933	NM_138933	NM_138933	A1CF	chr10:052570857-052570849	GO:0000166(nucleotide binding)|GO:0003676(nucleic acid binding)|GO:0003723(RNA binding)|GO:0003725(double-stranded RNA binding)|GO:0003727(single-stranded RNA binding)|GO:0003729(mRNA binding)|GO:0004131(cytosine deaminase activity)|GO:0005515(protein binding)|GO:0005622(intracellular)|GO:0005634(nucleus)|GO:0005654(nucleoplasm)|GO:0005720(nuclear heterochromatin)|GO:0005737(cytoplasm)|GO:0005783…	Hs.282795	ENST00000395489	Homo sapiens APOBEC1 complementation factor (A1CF), transcript variant 3, mRNA [NM_138933]	hs|10q11.72	NP91293998	GO:0000166(nucleotide binding)|GO:0003725(double-stranded RNA binding)|GO:0003727(single-stranded RNA binding)|GO:0005515(protein binding)|GO:0005634(nucleus)|GO:0005737(cytoplasm)|GO:0005783(endoplasmic reticulum)|GO:0006397(mRNA processing)|GO:0030895(apolipoprotein B mRNA editing enzyme complex)|GO:0050821(protein stabilization)	APOBEC1 complementation factor	GACAGCTATTCTTGTACAAAATAACTATTCCTGCTCTAGCCAGCCAGAATCCTGCAATCC	329099	GO:30895(apolipoprotein B mRNA editing enzyme complex); GO:5737(cytoplasm); GO:5634(nucleus)	GO:3725(double-stranded RNA binding); GO:3676(nucleic acid binding); GO:166(nucleotide binding); GO:5515(protein binding); GO:3727(single-stranded RNA binding)	Mammalian apolipoprotein B mRNA undergoes site-specific C to U deamination, which is mediated by a multi-component enzyme complex containing a minimal core composed of APOBEC-1 and a complementation factor encoded by this gene. The gene product has three non-identical RNA recognition motifs and belongs to the hnRNP R family of RNA-binding proteins. It has been proposed that this complementation f…	GO:6381(mRNA editing); GO:6397(mRNA processing); GO:50821(protein stabilization)			apobec-1 complementation factor isoform 52			16055734; 15164054; 15148397; 14702039; 12896982; 12881431; 12477932; 11871661; 11815617; 11752456; 11718896; 11577082; 11571303; 11352648; 11329013; 11134005; 11072063; 10833526; 10781591; 10669808
A_32_P110921	A2LD50	-0.788079	P	950378	1.11954e+06	LOC87818	NM_033110	NM_033110	NM_033110	A2LD50	chr13:101183916-101183906	GO:0003839(gamma-glutamylcyclotransferase activity)|GO:0016746(transferase activity, transferring acyl groups)|GO:0042219(cellular modified amino acid catabolic process)	Hs.350868	ENST00000455100	Homo sapiens AIG2-like domain 1 (A2LD1), transcript variant 1, mRNA [NM_033110]	hs|13q32.52	THC2610239		AIG2-like domain 50	GCTGTATATCAGAGTGCGTATAGCACCATTCTTCCTAATTTTCAGATCAAGCTTCACAGC	329740		GO:0005554(molecular function unknown)					LOC87769 protein			14702039; 12477981
A_23_P116947	A2M	-0.793521	P	953124	1.12278e+06	CPAMD5; FWP007; S863-7; alpha 2M; DKFZp779B135	NM_000014	NM_000014	NM_000014	A2M	chr12:009221418-009221408	GO:0001869(negative regulation of complement activation, lectin pathway)|GO:0002576(platelet degranulation)|GO:0004867(serine-type endopeptidase inhibitor activity)|GO:0005515(protein binding)|GO:0005576(extracellular region)|GO:0005615(extracellular space)|GO:0005829(cytosol)|GO:0007264(small GTPase mediated signal transduction)|GO:0007596(blood coagulation)|GO:0007597(blood coagulation, intrins…	Hs.212838	ENST00000540099	Homo sapiens alpha-2-macroglobulin (A2M), mRNA [NM_000014]	hs|12p13.31	NP1445964	GO:0001869(negative regulation of complement activation, lectin pathway)|GO:0004867(serine-type endopeptidase inhibitor activity)|GO:0005576(extracellular region)|GO:0005615(extracellular space)|GO:0006953(acute-phase response)|GO:0007584(response to nutrient)|GO:0010037(response to carbon dioxide)|GO:0019899(enzyme binding)|GO:0019959(interleukin-8 binding)|GO:0019966(interleukin-1 binding)|GO:0…	alpha-2-macroglobulin	CTTGTTCTTCACGGTTCTGCAAGATGTCCCAGTAAGAGATCTGAAACCAGCCATAGTGAA	330380	GO:5576(extracellular region)	GO:19899(enzyme binding); GO:19966(interleukin-1 binding); GO:19959(interleukin-8 binding); GO:8320(protein carrier activity); GO:4867(serine-type endopeptidase inhibitor activity); GO:43120(tumor necrosis factor binding); GO:17114(wide-spectrum protease inhibitor activity)	Alpha-2-macroglobulin is a protease inhibitor and cytokine transporter. It inhibits many proteases, including trypsin, thrombin and collagenase. A2M is implicated in Alzheimer disease (AD) due to its ability to mediate the clearance and degradation of A-beta, the major component of beta-amyloid deposits.	GO:6886(intracellular protein transport); GO:51260(protein homooligomerization)			alpha-2-macroglobulin precursor	Alzheimer disease, susceptibility to; Emphysema due to alpha-2-macroglobulin deficiency	KEGG pathway: Alzheimer's disease 05010; KEGG pathway: Complement and coagulation cascades 04610; Reactome Event:Hemostasis 109631	17071617; 16910174; 16784755; 16641085; 16407218; 16335952; 16297527; 16232083; 15931081; 15910735; 15908432; 15611997; 15511627; 15489334; 15023809; 14760718; 14718574; 14715656; 14678766; 14675603; 14637088; 14506912; 12966032; 12755687; 12755614; 12754519; 12631277; 12477932; 12221172; 12194978; 12175343; 12062545; 12042276; 12015318; 11916201; 11910179; 11901360; 11823454; 11811950; 11435418;…
A_33_P3525312	A2ML50	-0.798963	A	955870	1.12601e+06		NM_144670	NM_144670	NM_144670	A2ML50	chr12:009027061-009027169	GO:0004867(serine-type endopeptidase inhibitor activity)|GO:0005576(extracellular region)|GO:0005615(extracellular space)|GO:0010466(negative regulation of peptidase activity)|GO:0030414(peptidase inhibitor activity)|GO:0052548(regulation of endopeptidase activity)	Hs.620532	ENST00000541459	Homo sapiens alpha-2-macroglobulin-like 1 (A2ML1), mRNA [NM_144670]	hs|12p13.31	NP1448883	GO:0004867(serine-type endopeptidase inhibitor activity)|GO:0005515(protein binding)|GO:0005576(extracellular region)|GO:0005615(extracellular space)|GO:0052548(regulation of endopeptidase activity)	alpha-2-macroglobulin-like 50	AAAGTGTGCTGGTCACCAACTTGAAACCAGCAACCATCAAGGTCTATGACTACTACCTAC	331021
A_24_P151171	A1BG	-0.804405	A	958616	1.12925e+06	A1B; ABG; GAB; HYST2477; DKFZp686F1020				A1BG	chr19:058857206-058857197	GO:0003674(molecular_function)|GO:0005576(extracellular region)|GO:0008150(biological_process)	Hs.529161		Homo sapiens cDNA FLJ31639 fis, clone NT2RI2003655, weakly similar to ZINC FINGER PROTEIN 195. [AK056201]	hs|19q13.43	THC2461029		alpha-1-B glycoprotein	GCTAGTGATCTGGTTTACTGCCTTAGTAATATCTAGTTCCTAATATGCCTATGCCTTTTA	331661	GO:5576(extracellular region)	GO:3674(molecular_function)	The protein encoded by this gene is a plasma glycoprotein of unknown function. The protein shows sequence similarity to the variable regions of some immunoglobulin supergene family member proteins.	GO:8150(biological_process)			alpha 1B-glycoprotein			16335952; 15489334; 15461460; 15221005; 14760718; 14702039; 12477932; 8889549; 3610142; 3458201; 2591117
A_33_P3685266	A1BG	-0.809847	P	961362	1.13248e+06		NM_130786	NM_130786	NM_130786	A1BG	chr19:058858293-058858284	GO:0003674(molecular_function)|GO:0005576(extracellular region)|GO:0008150(biological_process)	Hs.529161	ENST00000263100	Homo sapiens alpha-1-B glycoprotein (A1BG), mRNA [NM_130786]	hs|19q13.43	THC2461029	GO:0003674(molecular_function)|GO:0005576(extracellular region)|GO:0008150(biological_process)	alpha-1-B glycoprotein	TCTCTGGGGGGCTGGAGAAGCCTCCCTCATTCCTCCCAGGAATTAATAAATGTGAAGAGA	332302
A_24_P721749	A1BG-AS51	-0.815289	A	964108	1.13571e+06	FLJ23619	NR_015380	NR_015380	NR_015380	A1BG-AS51	chr19:058866199-058866308		Hs.709582		Homo sapiens A1BG antisense RNA 1 (non-protein coding) (A1BG-AS1), non-coding RNA [NR_015380]	hs|19q13.43	NP92227823		A1BG antisense RNA 1 (non-protein coding)	AGGGTGTGCACAGAACTCAGAAGTCAGACCACTGAACAGTGACAGAACCTTTCAGCCCAT	332942					FLI_CDNA; oligo capping; fis (full insert sequence)					12477982
A_23_P104274	A1CF	-0.820731	P	966854	1.13895e+06	ACF; ASP; ACF64; ACF65; MGC163391; RP11-564C4.52	NM_138933	NM_138933	NM_138933	A1CF	chr10:052570857-052570850	GO:0000166(nucleotide binding)|GO:0003676(nucleic acid binding)|GO:0003723(RNA binding)|GO:0003725(double-stranded RNA binding)|GO:0003727(single-stranded RNA binding)|GO:0003729(mRNA binding)|GO:0004131(cytosine deaminase activity)|GO:0005515(protein binding)|GO:0005622(intracellular)|GO:0005634(nucleus)|GO:0005654(nucleoplasm)|GO:0005720(nuclear heterochromatin)|GO:0005737(cytoplasm)|GO:0005783…	Hs.282795	ENST00000395489	Homo sapiens APOBEC1 complementation factor (A1CF), transcript variant 3, mRNA [NM_138933]	hs|10q11.73	NP93161648	GO:0000166(nucleotide binding)|GO:0003725(double-stranded RNA binding)|GO:0003727(single-stranded RNA binding)|GO:0005515(protein binding)|GO:0005634(nucleus)|GO:0005737(cytoplasm)|GO:0005783(endoplasmic reticulum)|GO:0006397(mRNA processing)|GO:0030895(apolipoprotein B mRNA editing enzyme complex)|GO:0050821(protein stabilization)	APOBEC1 complementation factor	GACAGCTATTCTTGTACAAAATAACTATTCCTGCTCTAGCCAGCCAGAATCCTGCAATCC	333583	GO:30895(apolipoprotein B mRNA editing enzyme complex); GO:5737(cytoplasm); GO:5634(nucleus)	GO:3725(double-stranded RNA binding); GO:3676(nucleic acid binding); GO:166(nucleotide binding); GO:5515(protein binding); GO:3727(single-stranded RNA binding)	Mammalian apolipoprotein B mRNA undergoes site-specific C to U deamination, which is mediated by a multi-component enzyme complex containing a minimal core composed of APOBEC-1 and a complementation factor encoded by this gene. The gene product has three non-identical RNA recognition motifs and belongs to the hnRNP R family of RNA-binding proteins. It has been proposed that this complementation f…	GO:6381(mRNA editing); GO:6397(mRNA processing); GO:50821(protein stabilization)			apobec-1 complementation factor isoform 53			16055734; 15164054; 15148397; 14702039; 12896982; 12881431; 12477932; 11871661; 11815617; 11752456; 11718896; 11577082; 11571303; 11352648; 11329013; 11134005; 11072063; 10833526; 10781591; 10669809
A_32_P110922	A2LD51	-0.826173	P	969600	1.14218e+06	LOC87819	NM_033110	NM_033110	NM_033110	A2LD51	chr13:101183916-101183907	GO:0003839(gamma-glutamylcyclotransferase activity)|GO:0016746(transferase activity, transferring acyl groups)|GO:0042219(cellular modified amino acid catabolic process)	Hs.350868	ENST00000455100	Homo sapiens AIG2-like domain 1 (A2LD1), transcript variant 1, mRNA [NM_033110]	hs|13q32.53	THC2610240		AIG2-like domain 51	GCTGTATATCAGAGTGCGTATAGCACCATTCTTCCTAATTTTCAGATCAAGCTTCACAGC	334223		GO:0005554(molecular function unknown)					LOC87769 protein			14702039; 12477982
A_23_P116948	A2M	-0.831614	P	972346	1.14542e+06	CPAMD5; FWP007; S863-7; alpha 2M; DKFZp779B136	NM_000014	NM_000014	NM_000014	A2M	chr12:009221418-009221409	GO:0001869(negative regulation of complement activation, lectin pathway)|GO:0002576(platelet degranulation)|GO:0004867(serine-type endopeptidase inhibitor activity)|GO:0005515(protein binding)|GO:0005576(extracellular region)|GO:0005615(extracellular space)|GO:0005829(cytosol)|GO:0007264(small GTPase mediated signal transduction)|GO:0007596(blood coagulation)|GO:0007597(blood coagulation, intrins…	Hs.212838	ENST00000540099	Homo sapiens alpha-2-macroglobulin (A2M), mRNA [NM_000014]	hs|12p13.31	NP1451802	GO:0001869(negative regulation of complement activation, lectin pathway)|GO:0004867(serine-type endopeptidase inhibitor activity)|GO:0005576(extracellular region)|GO:0005615(extracellular space)|GO:0006953(acute-phase response)|GO:0007584(response to nutrient)|GO:0010037(response to carbon dioxide)|GO:0019899(enzyme binding)|GO:0019959(interleukin-8 binding)|GO:0019966(interleukin-1 binding)|GO:0…	alpha-2-macroglobulin	CTTGTTCTTCACGGTTCTGCAAGATGTCCCAGTAAGAGATCTGAAACCAGCCATAGTGAA	334864	GO:5576(extracellular region)	GO:19899(enzyme binding); GO:19966(interleukin-1 binding); GO:19959(interleukin-8 binding); GO:8320(protein carrier activity); GO:4867(serine-type endopeptidase inhibitor activity); GO:43120(tumor necrosis factor binding); GO:17114(wide-spectrum protease inhibitor activity)	Alpha-2-macroglobulin is a protease inhibitor and cytokine transporter. It inhibits many proteases, including trypsin, thrombin and collagenase. A2M is implicated in Alzheimer disease (AD) due to its ability to mediate the clearance and degradation of A-beta, the major component of beta-amyloid deposits.	GO:6886(intracellular protein transport); GO:51260(protein homooligomerization)			alpha-2-macroglobulin precursor	Alzheimer disease, susceptibility to; Emphysema due to alpha-2-macroglobulin deficiency	KEGG pathway: Alzheimer's disease 05010; KEGG pathway: Complement and coagulation cascades 04610; Reactome Event:Hemostasis 109632	17071617; 16910174; 16784755; 16641085; 16407218; 16335952; 16297527; 16232083; 15931081; 15910735; 15908432; 15611997; 15511627; 15489334; 15023809; 14760718; 14718574; 14715656; 14678766; 14675603; 14637088; 14506912; 12966032; 12755687; 12755614; 12754519; 12631277; 12477932; 12221172; 12194978; 12175343; 12062545; 12042276; 12015318; 11916201; 11910179; 11901360; 11823454; 11811950; 11435418;…
[truncated: 30,197 more rows]
